# Supplementary material for: BF 3 ·OEt 2 -mediated transamidation of unprotected primary amides under solvent-free conditions
Source: Royal Society of Chemistry journal article supplement (doi:10.1039/d4ob00875h), 2024-01-01
Supplement: d4ob00875h1.pdf [file d4ob00875h1.pdf]

## Supporting Information for

### **BF<sub>3</sub>•OEt<sub>2</sub>-Mediated Transamidation of Unprotected Primary Amides Under Solvent-free condition**

Qing-Wen Gui,<sup>a</sup> Shengneng Ying,<sup>a</sup> Xin Liu,<sup>a</sup> Jianfang Wang,<sup>b</sup> Xuliang

Xiao,<sup>a</sup> Zhuoliang Liu\*,<sup>b</sup> Xia Wang\*,<sup>a</sup> Yanxue Shang,<sup>a</sup> and Qiang Li<sup>c</sup>

<sup>a</sup> College of Chemistry and Materials Science, Hunan Agricultural University, Changsha, 410128, PR China. E-mail: [wangxia@hunau.edu.cn](mailto:wangxia@hunau.edu.cn)

<sup>b</sup> College of Science, National University of Defense Technology, Changsha 410128, P. R. China; Email: [hemazaizai@163.com](mailto:hemazaizai@163.com)

<sup>c</sup> College of Agronomy, Hunan Agricultural University, Changsha 410128, P. R. China

#### Table of Content

|                                                                         |            |
|-------------------------------------------------------------------------|------------|
| <b>1. General Information.....</b>                                      | <b>S2</b>  |
| <b>2. Experimental Section.....</b>                                     | <b>S2</b>  |
| <b>3. Optimize Reaction Conditions.....</b>                             | <b>S4</b>  |
| <b>4. Characterization data of products.....</b>                        | <b>S7</b>  |
| <b>5. <sup>1</sup>H and <sup>13</sup>C NMR spectra of products.....</b> | <b>S24</b> |
| <b>6. References .....</b>                                              | <b>S90</b> |

## 1. General Information

All glassware was oven dried at 60 °C for 8 hours and cooled down under vacuum. Unless otherwise noted, all reagents were purchased from commercial suppliers and used without further purification. Analytical thin layer chromatography (TLC) was performed on precoated aluminum-backed silica gel 60 F<sub>254</sub> plates (EMD Millipore, 200 μm thickness). TLC plates were visualized with ultraviolet light. Flash column chromatography was performed using Tsingtao silica gel (200-300). <sup>1</sup>H, <sup>13</sup>C and <sup>19</sup>F NMR spectra were recorded on a Bruker Avance DRX - 400 spectrometers; chemical shifts (δ) are given in ppm and calibrated using the signal of residual undeuterated solvent as internal reference (CDCl<sub>3</sub>: δH = 7.26 ppm and δC = 77.16 ppm, DMSO-*d*<sub>6</sub>: δH = 2.50 ppm and δC = 39.50 ppm). Data for <sup>1</sup>H NMR, <sup>19</sup>F NMR and <sup>13</sup>C NMR are reported as follows: chemical shift (δ, ppm), multiplicity, integration, and coupling constant (Hz).

## 2. Experimental Section

### *General experimental procedures for 3a*

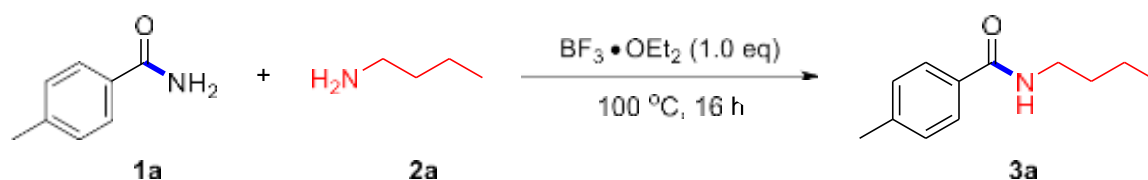

Para-toluamide **1** (1.0 eq, 0.50 mmol, 67.60 mg), n-butylamine **2** (2.0 eq, 1.00 mmol, 73.10 mg) and BF<sub>3</sub>•OEt<sub>2</sub> (1.0 eq, 0.50 mmol, 70.90 mg) were added separately to a dry reaction tube (10 mL) with magnetic stirrer, without adding additional solvent. The reaction was carried out in 100 °C oil bath for 16 h. After the reaction completed, the reaction solution was diluted with DCM, filtered by silica gel short column, and washed by DCM. The crude mixture is concentrated in vacuum, the crude mixture is concentrated in vacuum, and the obtained crude product is purified by silica gel flash chromatography. Eluted product **3a** with a mixture of ethyl acetate, petroleum ether and methylene chloride (1:16:5), and the yield was 96% (99.50 mg).

*General experimental procedures for 3d*

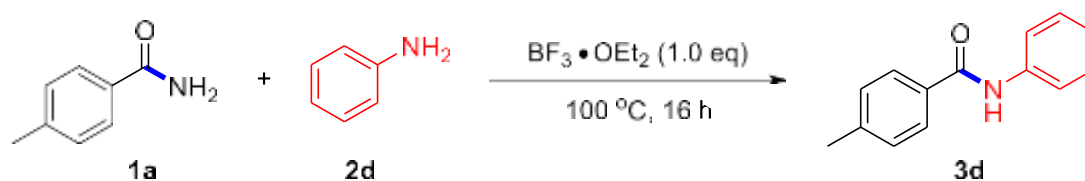

Para-toluamide **1** (1.0 eq, 0.50 mmol, 67.60 mg), aniline **2** (1.5 eq, 0.75 mmol, 69.80 mg) and  $\text{BF}_3 \cdot \text{OEt}_2$  (1.0 eq, 0.50 mmol, 70.90 mg) were added separately to a dry reaction tube (10 mL) with magnetic stirrer, without adding additional solvent. The reaction was carried out in  $100\text{ }^\circ\text{C}$  oil bath for 16 h. After the reaction completed, the reaction solution was diluted with DCM, filtered by silica gel short column, and washed by DCM. The crude mixture is concentrated in vacuum, the crude mixture is concentrated in vacuum, and the obtained crude product is purified by silica gel flash chromatography. Eluted product **3d** with a mixture of ethyl acetate, petroleum ether and methylene chloride (1:16:5), and the yield was 92% (97.20 mg).

### 3. Optimize Reaction Conditions

We started with 4-methylbenzamide **1a** and <sup>n</sup>Bu-NH<sub>2</sub> **2a** as model substrates to investigate the transamidation reaction. In order to optimize the reaction conditions, we set a series of experimental parameters, including the boron lewis acids, dosage of BF<sub>3</sub>•OEt<sub>2</sub>, solvent and reaction time.

**Table S1 Optimization of Boron Lewis acids**

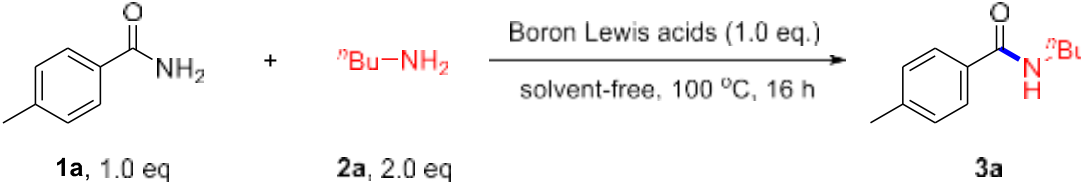

**1a**, 1.0 eq      **2a**, 2.0 eq      Boron Lewis acids (1.0 eq.)  
solvent-free, 100 °C, 16 h      **3a**

| Entry | Lewis acids                                    | Tem. (°C) | Solvent | Yield (%) <sup>b</sup> |
|-------|------------------------------------------------|-----------|---------|------------------------|
| 1     | HF <sub>3</sub> (48 wt.% in H <sub>2</sub> O)  | 100       | -       | 89                     |
| 2     | BCl <sub>3</sub> (1 M in PhMe)                 | 100       | -       | 55                     |
| 3     | BBr <sub>3</sub>                               | 100       | -       | 47                     |
| 4     | B(C <sub>6</sub> F <sub>5</sub> ) <sub>3</sub> | 100       | -       | 48                     |
| 5     | BF <sub>3</sub> •OEt <sub>2</sub>              | 100       | -       | 96                     |

**Table S2 Optimization of BF<sub>3</sub>•OEt<sub>2</sub> dosage**

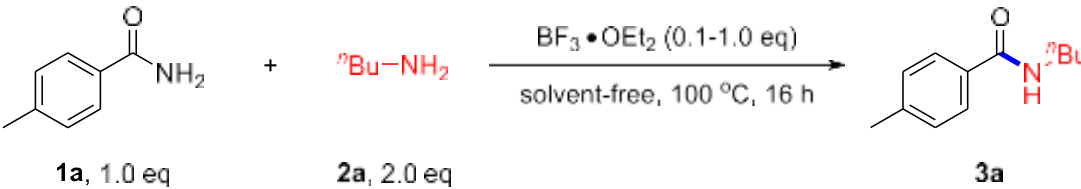

**1a**, 1.0 eq      **2a**, 2.0 eq      BF<sub>3</sub>•OEt<sub>2</sub> (0.1-1.0 eq)  
solvent-free, 100 °C, 16 h      **3a**

| Entry | Lewis acid (eq) | Tem. (°C) | Solvent | Yield (%) <sup>b</sup> |
|-------|-----------------|-----------|---------|------------------------|
| 1     | 0.1(10 mol%)    | 100       | -       | 44                     |
| 2     | 0.2             | 100       | -       | 60                     |
| 3     | 0.5             | 100       | -       | 67                     |
| 4     | 0.8             | 100       | -       | 81                     |
| 5     | 1.0             | 100       | -       | 96                     |

**Table S3 Optimization of reaction time**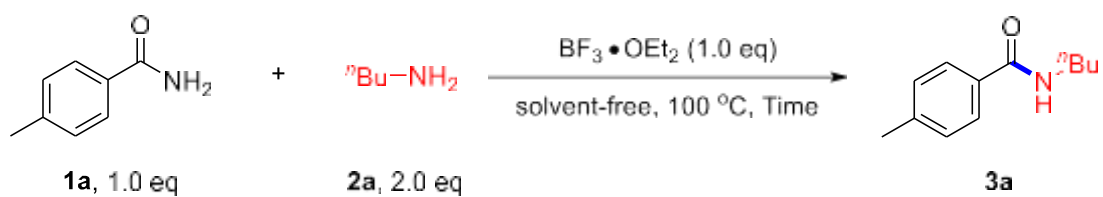

| Entry | Lewis acid                       | Tem. (°C) | Time (h) | Yield (%) <sup>b</sup> |
|-------|----------------------------------|-----------|----------|------------------------|
| 1     | $\text{BF}_3 \cdot \text{OEt}_2$ | 100       | 4        | 57                     |
| 2     | $\text{BF}_3 \cdot \text{OEt}_2$ | 100       | 8        | 73                     |
| 3     | $\text{BF}_3 \cdot \text{OEt}_2$ | 100       | 12       | 88                     |
| 4     | $\text{BF}_3 \cdot \text{OEt}_2$ | 100       | 16       | 96                     |

**Table S4 Optimization of Solvents**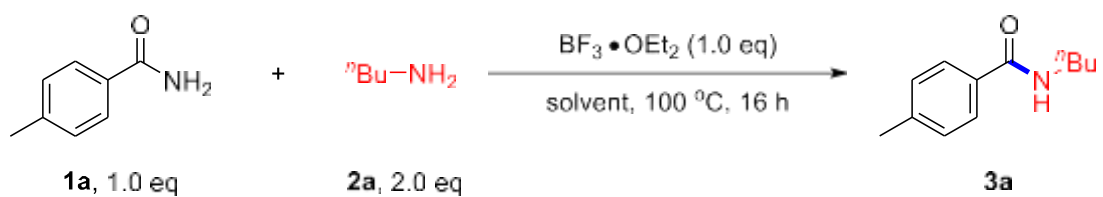

| Entry | Solvent     | Tem. (°C) | Time (h) | Yield (%) <sup>b</sup> |
|-------|-------------|-----------|----------|------------------------|
| 1     | THF         | 100       | 16       | 41                     |
| 2     | DMF         | 100       | 16       | 35                     |
| 3     | DMSO        | 100       | 16       | 31                     |
| 4     | Toluene     | 100       | 16       | 88                     |
| 5     | 2-MeTHF     | 100       | 16       | 39                     |
| 6     | 1,4-Dioxane | 100       | 16       | 47                     |
| 7     | --          | 100       | 16       | 96                     |

Figure S1 Radical Capture Experiments

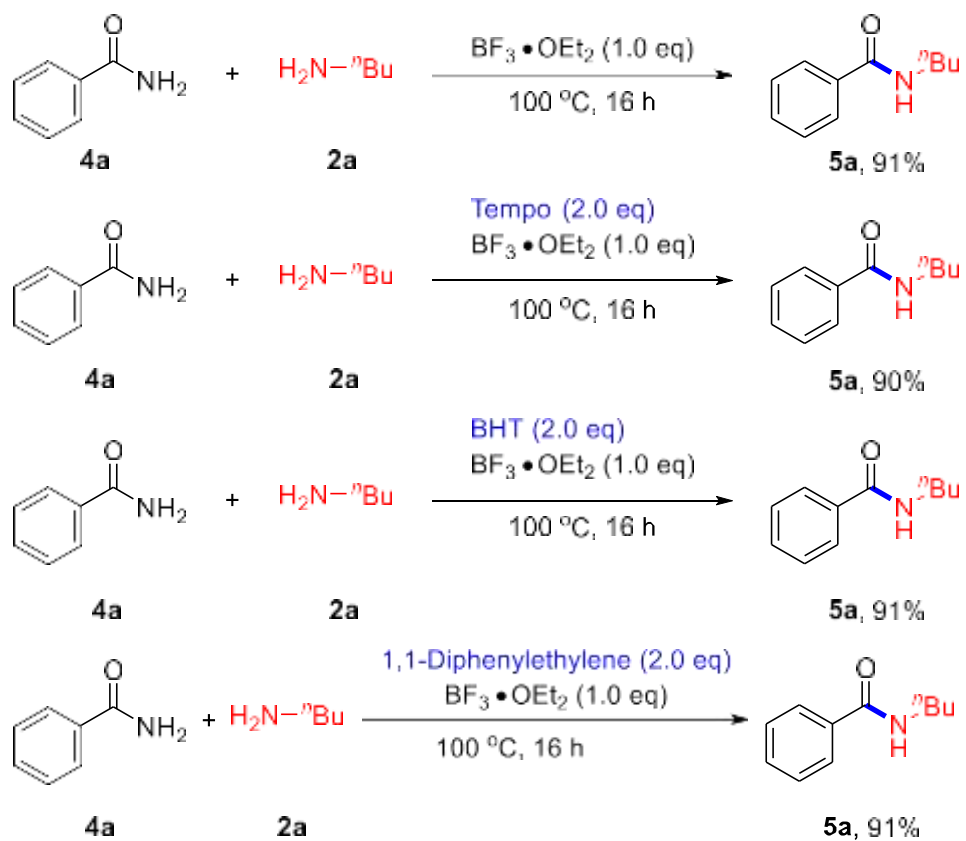

## 4. Characterization data of products

### *N*-butyl-4-methylbenzamide (**3a**)<sup>1</sup>

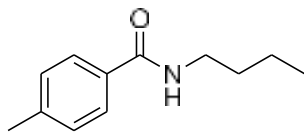

**3a** was obtained in 96% yield (99.50 mg) as a white oil;

<sup>1</sup>H NMR (400 MHz, CDCl<sub>3</sub>) δ 7.65 (d, *J* = 8.2 Hz, 2H), 7.17 (d, *J* = 8.2 Hz, 2H), 6.50 (s, 1H), 3.39 (q, *J* = 7.2, 6.8 Hz, 2H), 2.35 (s, 3H), 1.55 (t, *J* = 7.4 Hz, 2H), 1.36 (q, *J* = 7.4 Hz, 2H), 0.91 (t, *J* = 7.4 Hz, 3H).

<sup>13</sup>C NMR (100 MHz, CDCl<sub>3</sub>) δ 167.7, 141.6, 132.0, 129.1, 126.9, 39.8, 31.8, 21.4, 20.2, 13.8.

MS:m/z 207 (M<sup>+</sup>).

### *N*-cyclopentyl-4-methylbenzamide (**3b**)<sup>2</sup>

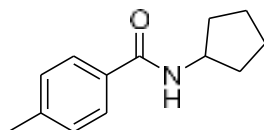

**3b** was obtained in 90% yield (91.50 mg) as a white solid;

<sup>1</sup>H NMR (400 MHz, CDCl<sub>3</sub>) δ 7.63 (d, *J* = 7.9 Hz, 2H), 7.18 (d, *J* = 7.7 Hz, 2H), 6.22 (s, 1H), 4.36 (q, *J* = 7.1 Hz, 1H), 2.36 (s, 3H), 2.12 – 1.97 (m, 2H), 1.75 – 1.55 (m, 4H), 1.54 – 1.37 (m, 2H).

<sup>13</sup>C NMR (100 MHz, CDCl<sub>3</sub>) δ 167.2, 141.6, 132.0, 129.2, 126.9, 51.7, 33.2, 23.9, 21.5.

MS:m/z 203 (M<sup>+</sup>).

### *N*-cyclohexyl-4-methylbenzamide (**3c**)<sup>3</sup>

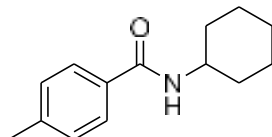

**3c** was obtained in 92% yield (99.90 mg) as a white solid;

<sup>1</sup>H NMR (400 MHz, CDCl<sub>3</sub>) δ 7.64 (d, *J* = 7.8 Hz, 2H), 7.17 (d, *J* = 7.8 Hz, 2H), 6.17 (s, 1H), 3.93 (s, 1H), 2.35 (s, 3H), 1.98 (d, *J* = 16.6 Hz, 2H), 1.71 (d, *J* = 13.9 Hz, 2H), 1.66 – 1.55 (m, 1H), 1.37 (q, *J* = 13.0, 12.6 Hz, 2H), 1.28 – 1.11 (m, 3H).

<sup>13</sup>C NMR (100 MHz, CDCl<sub>3</sub>) δ 166.7, 141.5, 132.3, 129.1, 126.9, 48.7, 33.2, 25.6, 25.0, 21.5.

MS:m/z 217 (M<sup>+</sup>).

### 4-methyl-*N*-phenylbenzamide (**3d**)<sup>4</sup>

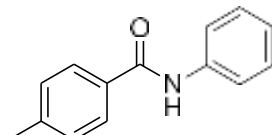

**3d** was obtained in 92% yield (97.10 mg) as a white solid;

<sup>1</sup>H NMR (400 MHz, CDCl<sub>3</sub>): δ 8.09 (s, 1H), 7.75 (d, *J* = 7.8 Hz, 2H), 7.64 (d, *J* = 8.0 Hz, 2H), 7.33 (t, *J* = 7.7 Hz, 2H), 7.22 (d, *J* = 7.8 Hz, 2H), 7.13 (t, *J* = 7.5 Hz, 1H), 2.40 (s, 3H).

<sup>13</sup>C NMR (100 MHz, CDCl<sub>3</sub>): δ 166.0, 142.4, 138.2, 132.2, 129.4, 129.1, 127.2, 124.5, 120.4, 21.6.

MS:m/z 211 (M<sup>+</sup>).

**4-methyl-N-(p-tolyl)benzamide (3e)<sup>5</sup>**

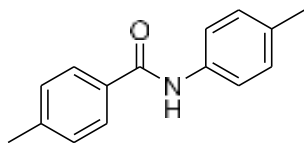

**3e** was obtained in 94% yield (105.80 mg) as a white solid;

<sup>1</sup>H NMR (400 MHz, DMSO-*d*<sub>6</sub>) δ 10.09 (s, 1H), 7.87 (d, *J* = 8.2 Hz, 2H), 7.66 (d, *J* = 8.4 Hz, 2H), 7.32 (d, *J* = 7.9 Hz, 2H), 7.14 (d, *J* = 8.2 Hz, 2H), 2.38 (s, 3H), 2.27 (s, 3H).

<sup>13</sup>C NMR (100 MHz, DMSO-*d*<sub>6</sub>) δ 165.1, 141.4, 136.7, 132.5, 132.2, 128.9, 128.9, 127.6, 120.4, 21.0, 20.5.

MS:m/z 225 (M<sup>+</sup>).

**4-methyl-N-(m-tolyl)benzamide (3f)<sup>6</sup>**

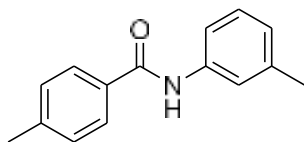

**3f** was obtained in 89% yield (100.10 mg) as a white solid;

<sup>1</sup>H NMR (400 MHz, CDCl<sub>3</sub>) δ 8.48 (s, 1H), 7.76 (d, *J* = 7.9 Hz, 2H), 7.52 (s, 1H), 7.47 (d, *J* = 8.3 Hz, 1H), 7.19 (d, *J* = 7.8 Hz, 1H), 7.15 (d, *J* = 8.1 Hz, 2H), 6.93 (d, *J* = 7.6 Hz, 1H), 2.37 (s, 3H), 2.29 (s, 3H).

<sup>13</sup>C NMR (100 MHz, CDCl<sub>3</sub>) δ 166.2, 142.0, 138.7, 138.1, 132.1, 129.2, 128.6, 127.2, 125.1, 121.2, 117.7, 21.4, 21.4.

MS:m/z 225 (M<sup>+</sup>).

**N-(3,5-dimethylphenyl)-4-methylbenzamide (3g)<sup>6</sup>**

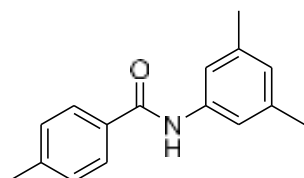

**3g** was obtained in 88% yield (105.10 mg) as a white solid;

<sup>1</sup>H NMR (400 MHz, CDCl<sub>3</sub>) δ 7.83 (s, 1H), 7.74 (d, *J* = 8.2 Hz, 2H), 7.27 (s, 2H), 7.24 (d, *J* = 8.0 Hz, 2H), 6.77 (s, 1H), 2.40 (s, 3H), 2.29 (s, 6H).

<sup>13</sup>C NMR (100 MHz, CDCl<sub>3</sub>) δ 165.7, 142.3, 138.8, 138.0, 132.4, 129.5, 127.1, 126.3, 118.1, 21.6, 21.5.

MS:m/z 239 (M<sup>+</sup>).

**N-(4-(tert-butyl)phenyl)-4-methylbenzamide (3h)<sup>7</sup>**

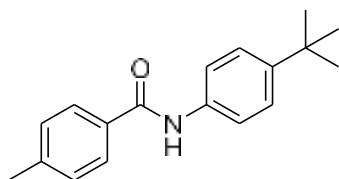

**3h** was obtained in 91% yield (121.50 mg) as a white solid;



$^1\text{H}$  NMR (400 MHz,  $\text{CDCl}_3$ )  $\delta$  7.88 (s, 1H), 7.75 (d,  $J = 7.9$  Hz, 2H), 7.55 (d,  $J = 8.6$  Hz, 2H), 7.36 (d,  $J = 8.5$  Hz, 2H), 7.24 (d,  $J = 7.7$  Hz, 2H), 2.40 (s, 3H), 1.31 (s, 9H).

$^{13}\text{C}$  NMR (100 MHz,  $\text{CDCl}_3$ )  $\delta$  165.8, 147.5, 142.3, 135.6, 132.4, 129.5, 127.2, 126.0, 120.2, 34.5, 31.5, 21.6.

MS:m/z 267 ( $\text{M}^+$ ).

*N*-(2,6-dimethylphenyl)-4-methylbenzamide (**3i**)<sup>8</sup>

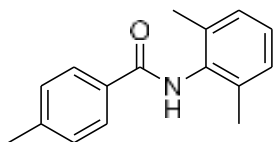

**3i** was obtained in 83% yield (99.20 mg) as a white solid;

$^1\text{H}$  NMR (400 MHz,  $\text{CDCl}_3$ )  $\delta$  7.79 (d,  $J = 7.9$  Hz, 2H), 7.51 (s, 1H), 7.25 (d,  $J = 7.6$  Hz, 2H), 7.11 (d,  $J = 5.1$  Hz, 1H), 7.09 (d,  $J = 5.3$  Hz, 2H), 2.42 (s, 3H), 2.23 (s, 6H).

$^{13}\text{C}$  NMR (100 MHz,  $\text{CDCl}_3$ )  $\delta$  165.9, 142.3, 135.7, 134.2, 131.7, 129.5, 128.3, 127.4, 127.4, 21.6, 18.6.

MS:m/z 239 ( $\text{M}^+$ ).

*N*-(2-methoxyphenyl)-4-methylbenzamide (**3j**)<sup>9</sup>

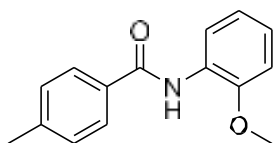

**3j** was obtained in 89% yield (107.20 mg) as a white solid;

$^1\text{H}$  NMR (400 MHz,  $\text{CDCl}_3$ )  $\delta$  8.55 (d,  $J = 7.4$  Hz, 2H), 7.80 (d,  $J = 7.9$  Hz, 2H), 7.29 (d,  $J = 7.9$  Hz, 2H), 7.11 – 6.98 (m, 2H), 6.91 (d,  $J = 8.0$  Hz, 1H), 3.91 (s, 3H), 2.42 (s, 3H).

$^{13}\text{C}$  NMR (100 MHz,  $\text{CDCl}_3$ )  $\delta$  165.3, 148.2, 142.2, 132.5, 129.5, 128.0, 127.1, 123.8, 121.2, 119.9, 110.0, 55.9, 21.6.

MS:m/z 241 ( $\text{M}^+$ ).

*N*-(4-(dimethylamino)phenyl)-4-methylbenzamide (**3k**)

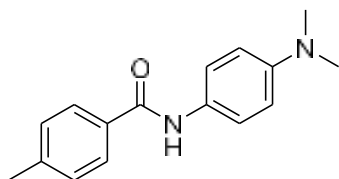

**3k** was obtained in 79% yield (100.30 mg) as a white solid;

$^1\text{H}$  NMR (400 MHz,  $\text{DMSO}-d_6$ )  $\delta$  9.91 (s, 1H), 7.89 (d,  $J = 7.9$  Hz, 2H), 7.60 (d,  $J = 8.6$  Hz, 2H), 7.31 (d,  $J = 7.8$  Hz, 2H), 6.73 (d,  $J = 8.8$  Hz, 2H), 2.87 (s, 6H), 2.38 (s, 3H).

$^{13}\text{C}$  NMR (100 MHz,  $\text{DMSO}-d_6$ )  $\delta$  164.5, 147.2, 141.0, 132.3, 128.9, 128.8, 127.5, 121.8, 112.4, 40.4, 20.9.

HRMS (ESI) m/z calcd. for  $\text{C}_{16}\text{H}_{18}\text{N}_2\text{O}$  [ $\text{M}+\text{H}$ ]<sup>+</sup>: 255.1492, found 255.1498.

*N*-(4-fluorophenyl)-4-methylbenzamide (**3l**)<sup>10</sup>

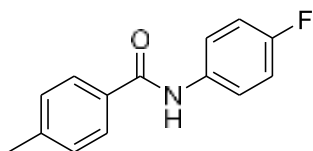

**3l** was obtained in 94% yield (107.60 mg) as a white solid;

$^1\text{H NMR}$  (400 MHz,  $\text{DMSO-}d_6$ )  $\delta$  10.22 (s, 1H), 7.87 (d,  $J = 8.0$  Hz, 2H), 7.81 (d,  $J = 5.1$  Hz, 1H), 7.79 (d,  $J = 5.1$  Hz, 1H), 7.33 (d,  $J = 7.9$  Hz, 2H), 7.18 (t,  $J = 8.9$  Hz, 2H), 2.38 (s, 3H).

$^{13}\text{C NMR}$  (100 MHz,  $\text{DMSO-}d_6$ )  $\delta$  165.3, 159.4, 157.0, 141.6, 135.6 (d,  $J = 2.5$  Hz), 131.9, 128.9, 127.7, 122.2 (d,  $J = 7.8$  Hz), 115.2, 115.0, 21.0.

$^{19}\text{F NMR}$  (376 MHz,  $\text{DMSO-}d_6$ )  $\delta$  -119.07.

MS:m/z 229 ( $\text{M}^+$ ).

*N*-(3-chlorophenyl)-4-methylbenzamide (**3m**)<sup>11</sup>

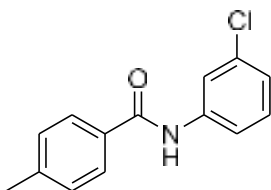

**3m** was obtained in 87% yield (106.90 mg) as a white solid;

$^1\text{H NMR}$  (400 MHz,  $\text{CDCl}_3$ )  $\delta$  8.12 (s, 1H), 7.74 (d,  $J = 6.9$  Hz, 2H), 7.71 (s, 1H), 7.48 (d,  $J = 8.3$  Hz, 1H), 7.22 (d,  $J = 8.0$  Hz, 3H), 7.08 (d,  $J = 7.9$  Hz, 1H), 2.39 (s, 3H).

$^{13}\text{C NMR}$  (100 MHz,  $\text{CDCl}_3$ )  $\delta$  166.1, 142.7, 139.4, 134.7, 131.7, 130.0, 129.5, 127.2, 124.5, 120.5, 118.4, 21.6.

MS:m/z 245 ( $\text{M}^+$ ).

4-methyl-*N*-(perfluorophenyl)benzamide (**3n**)<sup>12</sup>

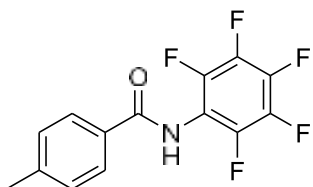

**3n** was obtained in 81% yield (122.00 mg) as a yellow solid;

$^1\text{H NMR}$  (400 MHz,  $\text{DMSO-}d_6$ )  $\delta$  10.44 (s, 1H), 7.91 (d,  $J = 8.0$  Hz, 2H), 7.37 (d,  $J = 7.9$  Hz, 2H), 2.40 (s, 3H).

$^{13}\text{C NMR}$  (100 MHz,  $\text{DMSO-}d_6$ )  $\delta$  165.3, 147.2 – 142.8 (m), 142.7, 141.7 – 136.1 (m), 129.5, 129.2, 128.0, 113.6 – 113.1 (m), 21.1

$^{19}\text{F NMR}$  (376 MHz,  $\text{DMSO-}d_6$ )  $\delta$  -140.54, -152.72, -158.68.

MS:m/z 301 ( $\text{M}^+$ ).

*N*,4-dimethyl-*N*-phenylbenzamide (**3o**)<sup>13</sup>

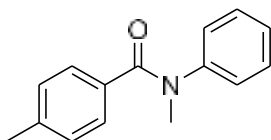

**3o** was obtained in 87% yield (98.00 mg) as a white solid;

$^1\text{H}$  NMR (400 MHz,  $\text{CDCl}_3$ )  $\delta$  7.22 – 7.13 (m, 4H), 7.12 – 7.04 (m, 1H), 7.00 (d,  $J = 7.9$  Hz, 2H), 6.91 (d,  $J = 7.8$  Hz, 2H), 3.45 (s, 3H), 2.19 (s, 3H).

$^{13}\text{C}$  NMR (100 MHz,  $\text{CDCl}_3$ )  $\delta$  170.5, 145.0, 139.7, 132.8, 129.0, 128.8, 128.3, 126.7, 126.3, 38.4, 21.3.

MS:m/z 225 ( $\text{M}^+$ ).

*N*-ethyl-4-methyl-*N*-phenylbenzamide (**3p**)<sup>14</sup>

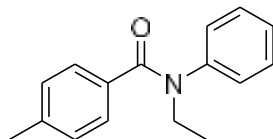

**3p** was obtained in 77% yield (92.10 mg) as a white solid;

$^1\text{H}$  NMR (400 MHz,  $\text{CDCl}_3$ )  $\delta$  7.26 – 7.15 (m, 4H), 7.17 – 7.08 (m, 1H), 7.02 (d,  $J = 7.7$  Hz, 2H), 6.93 (d,  $J = 7.9$  Hz, 2H), 3.97 (q,  $J = 7.1$  Hz, 2H), 2.22 (s, 3H), 1.21 (t,  $J = 7.1$  Hz, 3H).

$^{13}\text{C}$  NMR (100 MHz,  $\text{CDCl}_3$ )  $\delta$  170.2, 143.6, 139.6, 133.4, 129.1, 128.9, 128.4, 127.9, 126.5, 45.5, 21.4, 13.0.

MS:m/z 239 ( $\text{M}^+$ ).

(3,4-dihydroquinolin-1(2H)-yl)(*p*-tolyl)methanone (**3q**)<sup>15</sup>

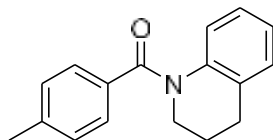

**3q** was obtained in 57% yield (71.60 mg) as a white solid;

$^1\text{H}$  NMR (400 MHz,  $\text{CDCl}_3$ )  $\delta$  7.17 (d,  $J = 7.7$  Hz, 2H), 7.04 (d,  $J = 7.5$  Hz, 1H), 6.96 (d,  $J = 7.8$  Hz, 2H), 6.88 (t,  $J = 7.5$  Hz, 1H), 6.76 (t,  $J = 7.8$  Hz, 1H), 6.63 (d,  $J = 8.1$  Hz, 1H), 3.80 (t,  $J = 6.5$  Hz, 2H), 2.73 (t,  $J = 6.6$  Hz, 2H), 2.22 (s, 3H), 1.93 (t,  $J = 6.6$  Hz, 2H).

$^{13}\text{C}$  NMR (100 MHz,  $\text{CDCl}_3$ )  $\delta$  170.3, 140.3, 139.5, 133.3, 131.5, 128.7, 128.7, 128.3, 125.7, 125.4, 124.4, 44.4, 26.9, 24.2, 21.4.

MS:m/z 251 ( $\text{M}^+$ ).

*N,N*-diethyl-4-methylbenzamide (**3r**)<sup>13</sup>

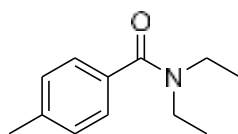

**3r** was obtained in 53% yield (50.60 mg) as a white oil;

$^1\text{H}$  NMR (400 MHz,  $\text{DMSO}-d_6$ )  $\delta$  7.22 (s, 4H), 3.40 (s, 2H), 3.18 (s, 2H), 2.32 (s, 3H), 1.24 – 0.90 (m, 6H).

$^{13}\text{C}$  NMR (100 MHz,  $\text{DMSO}-d_6$ )  $\delta$  170.2, 138.6, 134.5, 128.9, 126.2, 42.9, 38.9, 20.9, 14.1, 12.9.

MS:m/z 191 ( $\text{M}^+$ ).

*N,N*-diisopropyl-4-methylbenzamide (**3s**)<sup>16</sup>

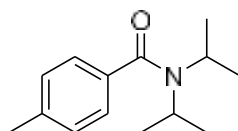

**3s** was obtained in 44% yield (48.30 mg) as a white solid;

$^1\text{H NMR}$  (400 MHz,  $\text{DMSO-}d_6$ )  $\delta$  7.21 (d,  $J = 7.8$  Hz, 2H), 7.15 (d,  $J = 8.0$  Hz, 2H), 3.62 (s, 2H), 2.31 (s, 3H), 1.26 (m, 12H).

$^{13}\text{C NMR}$  (100 MHz,  $\text{DMSO-}d_6$ )  $\delta$  170.0, 138.0, 136.2, 129.0, 125.4, 20.9, 20.4.

MS:m/z 219 ( $\text{M}^+$ ).

*N,N*-dibenzyl-4-methylbenzamide (**3t**)<sup>17</sup>

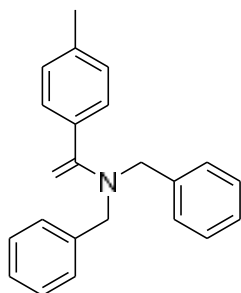

**3t** was obtained in 51% yield (80.40 mg) as a white solid;

$^1\text{H NMR}$  (400 MHz,  $\text{DMSO-}d_6$ )  $\delta$  7.41 – 7.10 (m, 14H), 4.56 (s, 2H), 4.39 (s, 2H), 2.29 (s, 3H).

$^{13}\text{C NMR}$  (100 MHz,  $\text{DMSO-}d_6$ )  $\delta$  171.5, 139.3, 136.7, 133.3, 129.1, 128.8, 127.6, 126.8, 126.6, 51.5, 46.9, 20.9.

MS:m/z 315 ( $\text{M}^+$ ).

*Morpholino*(*p*-tolyl)methanone (**3u**)<sup>18</sup>

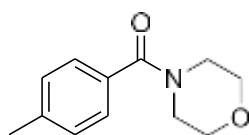

**3u** was obtained in 60% yield (61.50 mg) as a white oil;

$^1\text{H NMR}$  (400 MHz,  $\text{DMSO-}d_6$ )  $\delta$  7.30 (d,  $J = 8.2$  Hz, 2H), 7.24 (d,  $J = 7.9$  Hz, 2H), 3.57 (s, 8H), 2.32 (s, 3H).

$^{13}\text{C NMR}$  (100 MHz,  $\text{DMSO-}d_6$ )  $\delta$  169.3, 139.4, 132.7, 129.0, 127.2, 66.2, 21.0.

MS:m/z 205 ( $\text{M}^+$ ).

*N*-(*p*-tolyl)butyramide (**3v**)<sup>19</sup>

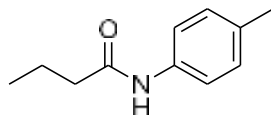

**3v** was obtained in 81% yield (71.70 mg) as a white solid

$^1\text{H NMR}$  (400 MHz,  $\text{DMSO-}d_6$ )  $\delta$  9.75 (s, 1H), 7.47 (d,  $J = 8.0$  Hz, 2H), 7.08 (d,  $J = 8.0$  Hz, 2H), 2.26 (d,  $J = 7.3$  Hz, 2H), 2.23 (s, 3H), 1.60 (q,  $J = 7.3$  Hz, 2H), 0.90 (t,  $J = 6.7$  Hz, 3H).

$^{13}\text{C NMR}$  (100 MHz,  $\text{DMSO-}d_6$ )  $\delta$  170.8, 136.8, 131.7, 129.0, 119.0, 38.3, 20.4, 18.6, 13.6.

MS:m/z 177 ( $\text{M}^+$ ).

*N*-(3,5-dimethylphenyl)butyramide (**3w**)<sup>20</sup>

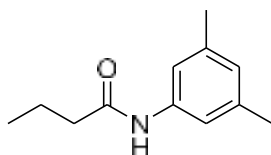

**3w** was obtained in 90% yield (86.00 mg) as a yellow oil

$^1\text{H NMR}$  (400 MHz,  $\text{CDCl}_3$ )  $\delta$  7.64 (s, 1H), 7.17 (s, 2H), 6.73 (s, 1H), 2.30 (t,  $J = 7.5$  Hz, 2H), 2.25 (s, 6H), 1.73 (q,  $J = 7.4$  Hz, 2H), 0.97 (t,  $J = 7.4$  Hz, 3H).

$^{13}\text{C NMR}$  (100 MHz,  $\text{CDCl}_3$ )  $\delta$  171.7, 138.6, 138.0, 125.9, 117.8, 39.7, 21.4, 19.2, 13.8.

MS:m/z 191 ( $\text{M}^+$ ).

*N*-(4-(*tert*-butyl)phenyl)butyramide (**3x**)<sup>21</sup>

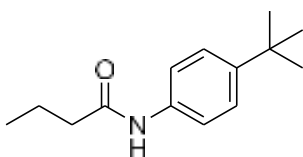

**3x** was obtained in 94% yield (110.60 mg) as a yellow oil

$^1\text{H NMR}$  (400 MHz,  $\text{DMSO-}d_6$ )  $\delta$  9.77 (s, 1H), 7.49 (d,  $J = 8.5$  Hz, 2H), 7.25 (d,  $J = 8.5$  Hz, 2H), 2.24 (t,  $J = 7.3$  Hz, 2H), 1.59 (q,  $J = 7.4$  Hz, 2H), 1.21 (s, 9H), 0.88 (t,  $J = 7.4$  Hz, 3H).

$^{13}\text{C NMR}$  (100 MHz,  $\text{DMSO-}d_6$ )  $\delta$  171.1, 145.4, 136.8, 125.2, 119.1, 38.4, 34.0, 31.3, 18.8, 13.7.

MS:m/z 235 ( $\text{M}^+$ ).

*N*-(2-methoxyphenyl)butyramide (**3y**)<sup>22</sup>

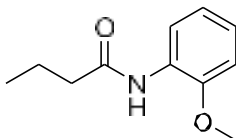

**3y** was obtained in 93% yield (89.80 mg) as a yellow oil

$^1\text{H NMR}$  (400 MHz,  $\text{CDCl}_3$ )  $\delta$  8.29 (d,  $J = 6.2$  Hz, 1H), 7.70 (s, 1H), 6.91 (d,  $J = 7.4$  Hz, 1H), 6.85 (d,  $J = 7.6$  Hz, 1H), 6.75 (d,  $J = 7.8$  Hz, 1H), 3.76 (s, 3H), 2.26 (t,  $J = 7.5$  Hz, 2H), 1.65 (q,  $J = 7.4$  Hz, 2H), 0.90 (t,  $J = 7.4$  Hz, 3H).

$^{13}\text{C NMR}$  (100 MHz,  $\text{CDCl}_3$ )  $\delta$  171.2, 147.7, 127.7, 123.5, 121.0, 119.7, 109.8, 55.6, 40.0, 19.1, 13.8.

MS:m/z 193 ( $\text{M}^+$ ).

*N*-(3-methoxyphenyl)butyramide (**3z**)<sup>23</sup>

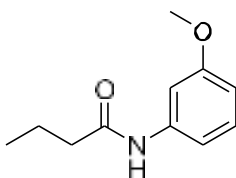

**3z** was obtained in 90% yield (86.90 mg) as a yellow oil

$^1\text{H NMR}$  (400 MHz,  $\text{CDCl}_3$ )  $\delta$  7.70 (s, 1H), 7.33 (s, 1H), 7.17 (t,  $J = 8.2$  Hz, 1H), 6.98 (d,  $J = 7.9$  Hz, 1H), 6.65 (d,  $J = 2.6$  Hz, 1H), 3.76 (s, 3H), 2.32 (t,  $J = 7.5$  Hz, 2H), 1.73 (q,  $J = 7.4$  Hz, 2H), 0.97 (t,  $J = 7.4$  Hz, 3H).

$^{13}\text{C NMR}$  (100 MHz,  $\text{CDCl}_3$ )  $\delta$  171.8, 160.1, 139.4, 129.7, 112.0, 110.1, 105.5, 55.3, 39.71, 19.1, 13.8.

MS:m/z 193 ( $\text{M}^+$ ).

*N*-(4-phenoxyphenyl)butyramide (**3aa**)<sup>24</sup>

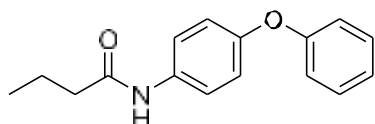

**3aa** was obtained in 77% yield (98.30 mg) as a white solid

<sup>1</sup>H NMR (400 MHz, CDCl<sub>3</sub>) δ 8.05 (s, 1H), 7.49 (d, *J* = 8.5 Hz, 2H), 7.30 (t, *J* = 7.8 Hz, 2H), 7.07 (t, *J* = 7.4 Hz, 1H), 6.95 (t, *J* = 8.2 Hz, 4H), 2.33 (t, *J* = 7.5 Hz, 2H), 1.74 (q, *J* = 7.4 Hz, 2H), 0.98 (t, *J* = 7.4 Hz, 3H).

<sup>13</sup>C NMR (100 MHz, CDCl<sub>3</sub>) δ 171.9, 157.6, 153.3, 133.7, 129.8, 123.1, 121.9, 119.6, 118.4, 39.4, 19.2, 13.8.

MS:m/z 255 (M<sup>+</sup>).

*N*-(3-(trifluoromethyl)phenyl)butyramide (**3ab**)<sup>25</sup>

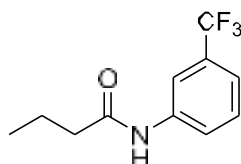

**3ab** was obtained in 83% yield (95.90 mg) as a white solid

<sup>1</sup>H NMR (400 MHz, CDCl<sub>3</sub>) δ 8.61 (s, 1H), 7.88 (s, 1H), 7.70 (d, *J* = 7.6 Hz, 1H), 7.35 (t, *J* = 7.8 Hz, 1H), 7.31 (d, *J* = 7.9 Hz, 1H), 2.36 (t, *J* = 7.5 Hz, 2H), 1.73 (q, *J* = 7.4 Hz, 2H), 0.95 (t, *J* = 7.4 Hz, 3H).

<sup>13</sup>C NMR (100 MHz, CDCl<sub>3</sub>) δ 172.8, 138.8, 131.4, 131.1, 129.4, 125.3, 123.3, 122.6, 120.8 (d, *J* = 3.7 Hz), 117.0 (d, *J* = 3.9 Hz), 39.4, 19.1, 13.7.

<sup>19</sup>F NMR (376 MHz, CDCl<sub>3</sub>) δ -62.83.

MS:m/z 231 (M<sup>+</sup>).

*N*-(3-chlorophenyl)butyramide (**3ac**)<sup>20</sup>

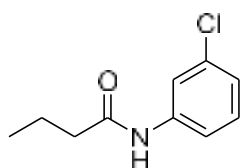

**3ac** was obtained in 83% yield (82.00 mg) as a yellow oil

<sup>1</sup>H NMR (400 MHz, CDCl<sub>3</sub>) δ 8.24 (s, 1H), 7.66 (s, 1H), 7.36 (d, *J* = 10.1 Hz, 1H), 7.17 (t, *J* = 8.1 Hz, 1H), 7.03 (d, *J* = 8.7 Hz, 1H), 2.33 (t, *J* = 7.5 Hz, 2H), 1.72 (q, *J* = 7.4 Hz, 2H), 0.96 (t, *J* = 7.4 Hz, 3H).

<sup>13</sup>C NMR (100 MHz, CDCl<sub>3</sub>) δ 172.3, 139.3, 134.5, 129.9, 124.2, 120.3, 118.2, 39.5, 19.2, 13.8.

MS:m/z 197 (M<sup>+</sup>).

*N*-(3-bromophenyl)butyramide (**3ad**)

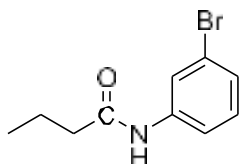

**3ad** was obtained in 90% yield (108.90 mg) as a yellow oil

$^1\text{H NMR}$  (400 MHz,  $\text{CDCl}_3$ )  $\delta$  7.90 (s, 1H), 7.79 (d,  $J = 2.6$  Hz, 1H), 7.41 (d,  $J = 8.0$  Hz, 1H), 7.20 (d,  $J = 8.0$  Hz, 1H), 7.14 (d,  $J = 8.0$  Hz, 1H), 2.33 (t,  $J = 7.4$  Hz, 2H), 1.73 (q,  $J = 7.4$  Hz, 2H), 0.96 (t,  $J = 7.4$  Hz, 3H).

$^{13}\text{C NMR}$  (100 MHz,  $\text{CDCl}_3$ )  $\delta$  172.1, 139.4, 130.3, 127.2, 123.0, 123.0, 122.6, 118.5, 118.5, 39.6, 19.1, 13.8.

HRMS (ESI)  $m/z$  calcd. for  $\text{C}_{10}\text{H}_{12}\text{BrNO}$   $[\text{M}+\text{H}]^+$ : 242.0175, found 242.0189.

*N*-(3,5-dichlorophenyl)butanamide (**3ae**)

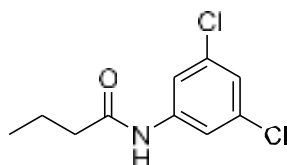

**3ae** was obtained in 81% yield (94.00 mg) as a white solid

$^1\text{H NMR}$  (400 MHz,  $\text{CDCl}_3$ )  $\delta$  7.78 (s, 1H), 7.48 (d,  $J = 1.8$  Hz, 2H), 7.06 (s, 1H), 2.34 (t,  $J = 7.4$  Hz, 2H), 1.74 (q,  $J = 7.4$  Hz, 2H), 0.98 (t,  $J = 7.4$  Hz, 3H).

$^{13}\text{C NMR}$  (100 MHz,  $\text{CDCl}_3$ )  $\delta$  172.1, 139.9, 135.3, 124.2, 118.3, 39.6, 19.1, 13.8.

HRMS (ESI)  $m/z$  calcd. for  $\text{C}_{10}\text{H}_{11}\text{Cl}_2\text{NO}$   $[\text{M}+\text{H}]^+$ : 232.0290, found 232.0295.

*N*-butylbenzamide (**5a**)<sup>26</sup>

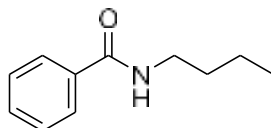

**5a** was obtained in 93% yield (82.40 mg) as a white oil;

$^1\text{H NMR}$  (400 MHz,  $\text{CDCl}_3$ )  $\delta$  7.75 (d,  $J = 7.6$  Hz, 2H), 7.45 (t,  $J = 7.3$  Hz, 1H), 7.38 (t,  $J = 7.5$  Hz, 2H), 6.45 (s, 1H), 3.42 (q,  $J = 6.7$  Hz, 2H), 1.64 – 1.47 (m, 2H), 1.38 (q,  $J = 7.5$  Hz, 2H), 0.92 (t,  $J = 7.3$  Hz, 3H).

$^{13}\text{C NMR}$  (100 MHz,  $\text{CDCl}_3$ )  $\delta$  167.7, 134.9, 131.3, 128.5, 127.0, 39.9, 31.8, 20.2, 13.9.

MS:  $m/z$  177 ( $\text{M}^+$ ).

4-(*tert*-butyl)-*N*-butylbenzamide (**5b**)<sup>27</sup>

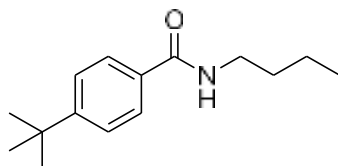

**5b** was obtained in 93% yield (108.50 mg) as a white oil;

$^1\text{H}$  NMR (400 MHz, DMSO- $d_6$ )  $\delta$  8.35 (s, 1H), 7.77 (d,  $J = 8.3$  Hz, 2H), 7.44 (d,  $J = 8.3$  Hz, 2H), 3.25 (q,  $J = 6.6$  Hz, 2H), 1.52 – 1.42 (m, 2H), 1.35 – 1.29 (m, 2H), 1.28 (s, 9H), 0.89 (t,  $J = 7.3$  Hz, 3H).  
 $^{13}\text{C}$  NMR (100 MHz, DMSO- $d_6$ )  $\delta$  165.7, 153.6, 132.0, 127.0, 124.9, 38.8, 34.5, 31.3, 30.9, 19.7, 13.7.  
MS:m/z 233 ( $\text{M}^+$ ).

***N*-butyl-4-methoxybenzamide (5c)**<sup>27</sup>

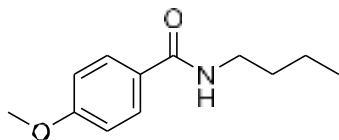

**5c** was obtained in 93% yield (96.40 mg) as a white solid;

$^1\text{H}$  NMR (400 MHz,  $\text{CDCl}_3$ )  $\delta$  7.73 (d,  $J = 8.3$  Hz, 2H), 6.95 (s, 1H), 6.79 (d,  $J = 8.4$  Hz, 2H), 3.74 (s, 3H), 3.32 (q,  $J = 6.8$  Hz, 2H), 1.50 (t,  $J = 7.6$  Hz, 2H), 1.29 (q,  $J = 7.6$  Hz, 2H), 0.84 (t,  $J = 7.4$  Hz, 3H).  
 $^{13}\text{C}$  NMR (100 MHz,  $\text{CDCl}_3$ )  $\delta$  167.3, 161.9, 128.8, 127.0, 113.5, 55.3, 39.8, 31.7, 20.1, 13.8.  
MS:m/z 207 ( $\text{M}^+$ ).

***N*-butyl-3,4,5-trimethoxybenzamide (5d)**<sup>28</sup>

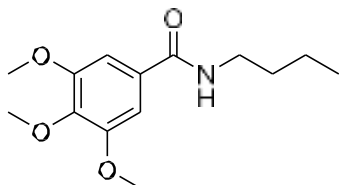

**5d** was obtained in 88% yield (117.60 mg) as a white oil;

$^1\text{H}$  NMR (400 MHz,  $\text{CDCl}_3$ )  $\delta$  7.06 (s, 2H), 6.95 (t,  $J = 5.8$  Hz, 1H), 3.84 (s, 4H), 3.81 (s, 6H), 3.37 (q,  $J = 6.7$  Hz, 2H), 1.54 (t,  $J = 7.5$  Hz, 2H), 1.34 (q,  $J = 7.5$  Hz, 2H), 0.89 (t,  $J = 7.4$  Hz, 3H).  
 $^{13}\text{C}$  NMR (100 MHz,  $\text{CDCl}_3$ )  $\delta$  167.2, 153.0, 140.5, 130.2, 104.4, 60.8, 56.1, 39.9, 31.7, 20.1, 13.7.  
MS:m/z 267 ( $\text{M}^+$ ).

***N*-butyl-4-chlorobenzamide (5e)**<sup>29</sup>

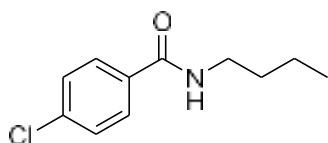

**5e** was obtained in 92% yield (97.40 mg) as a white solid;

$^1\text{H}$  NMR (400 MHz, DMSO- $d_6$ )  $\delta$  8.51 (t,  $J = 5.6$  Hz, 1H), 7.85 (d,  $J = 8.3$  Hz, 2H), 7.52 (d,  $J = 8.3$  Hz, 2H), 3.24 (q,  $J = 6.6$  Hz, 2H), 1.58 – 1.40 (m, 2H), 1.31 (q,  $J = 7.4$  Hz, 2H), 0.89 (t,  $J = 7.3$  Hz, 3H).  
 $^{13}\text{C}$  NMR (100 MHz, DMSO- $d_6$ )  $\delta$  165.0, 135.8, 133.4, 129.1, 128.3, 38.9, 31.2, 19.7, 13.7.  
MS:m/z 211 ( $\text{M}^+$ ).

***N*-butyl-4-nitrobenzamide (5f)**<sup>30</sup>

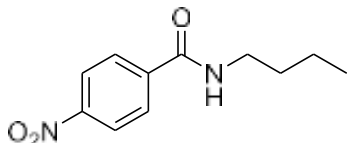

**5f** was obtained in 91% yield (101.10 mg) as a white solid;



$^1\text{H NMR}$  (400 MHz,  $\text{CDCl}_3$ )  $\delta$  8.15 (d,  $J = 8.7$  Hz, 2H), 7.90 (d,  $J = 8.7$  Hz, 2H), 7.16 (s, 1H), 3.38 (q,  $J = 6.7$  Hz, 2H), 1.60 – 1.44 (m, 2H), 1.33 (q,  $J = 7.6$  Hz, 2H), 0.87 (t,  $J = 7.3$  Hz, 3H).

$^{13}\text{C NMR}$  (100 MHz,  $\text{CDCl}_3$ )  $\delta$  165.8, 149.3, 140.5, 128.3, 123.6, 40.2, 31.5, 20.1, 13.7.

MS:m/z 222 ( $\text{M}^+$ ).

***N*-butyl-3-(trifluoromethyl)benzamide (5g)**<sup>31</sup>

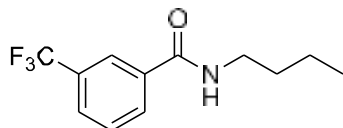

**5g** was obtained in 89% yield (109.10 mg) as a white oil;

$^1\text{H NMR}$  (400 MHz,  $\text{CDCl}_3$ )  $\delta$  8.02 (s, 1H), 7.93 (d,  $J = 7.8$  Hz, 1H), 7.68 (d,  $J = 7.7$  Hz, 1H), 7.48 (t,  $J = 7.9$  Hz, 1H), 6.90 (s, 1H), 3.41 (q,  $J = 7.0, 6.3$  Hz, 2H), 1.57 (t,  $J = 7.6$  Hz, 2H), 1.42 – 1.24 (m, 2H), 0.99 – 0.75 (m, 3H).

$^{13}\text{C NMR}$  (100 MHz,  $\text{CDCl}_3$ )  $\delta$  166.5, 135.7, 132.8 – 131.9 (m), 131.0 (d,  $J = 32.7$  Hz), 129.7 (d,  $J = 124.8$  Hz), 124.4 (t,  $J = 54.5$  Hz), 40.13, 31.65, 20.21, 13.77).

$^{19}\text{F NMR}$  (376 MHz,  $\text{CDCl}_3$ )  $\delta$  -62.80.

MS:m/z 245 ( $\text{M}^+$ ).

***N*-butyl-4-cyanobenzamide (5h)**<sup>32</sup>

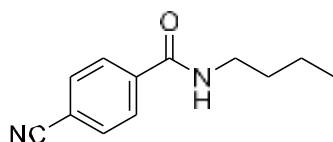

**5h** was obtained in 92% yield (93.00 mg) as a white oil;

$^1\text{H NMR}$  (400 MHz,  $\text{CDCl}_3$ )  $\delta$  7.85 (d,  $J = 8.4$  Hz, 2H), 7.62 (d,  $J = 8.4$  Hz, 2H), 7.15 (s, 1H), 3.34 (q,  $J = 6.8$  Hz, 2H), 1.58 – 1.43 (m, 2H), 1.31 (q,  $J = 7.6$  Hz, 2H), 0.86 (t,  $J = 7.2$  Hz, 3H).

$^{13}\text{C NMR}$  (100 MHz,  $\text{CDCl}_3$ )  $\delta$  165.9, 138.8, 132.2, 127.8, 118.1, 114.5, 40.0, 31.4, 20.1, 13.7.

MS:m/z 202 ( $\text{M}^+$ ).

***4*-amino-*N*-butylbenzamide (5i)**<sup>33</sup>

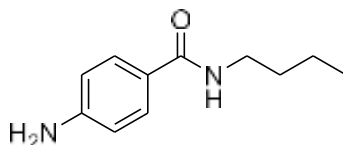

**5i** was obtained in 91% yield (87.40 mg) as a white solid;

$^1\text{H NMR}$  (400 MHz,  $\text{CDCl}_3$ )  $\delta$  7.58 (d,  $J = 8.5$  Hz, 2H), 6.64 (d,  $J = 8.1$  Hz, 2H), 6.08 (s, 1H), 4.00 (s, 2H), 3.40 (q,  $J = 6.7$  Hz, 2H), 1.63 – 1.48 (m, 2H), 1.38 (q,  $J = 7.5$  Hz, 2H), 0.93 (t,  $J = 7.3$  Hz, 3H).

$^{13}\text{C NMR}$  (100 MHz,  $\text{CDCl}_3$ )  $\delta$  167.4, 149.6, 128.6, 124.4, 114.2, 39.8, 32.0, 20.3, 14.0.

MS:m/z 192 ( $\text{M}^+$ ).

***N*-butyl-2-naphthamide (5j)**<sup>34</sup>

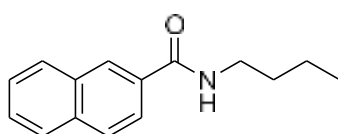

**5j** was obtained in 92% yield (104.60 mg) as a white solid;

$^1\text{H}$  NMR (400 MHz, DMSO- $d_6$ )  $\delta$  8.62 (s, 1H), 8.45 (s, 1H), 8.07 – 8.00 (m, 1H), 7.99 – 7.91 (m, 3H), 7.68 – 7.47 (m, 2H), 3.36 – 3.25 (m, 2H), 1.55 (t,  $J = 7.0$  Hz, 2H), 1.39 – 1.31 (m, 2H), 0.91 (t,  $J = 7.3$  Hz, 3H).

$^{13}\text{C}$  NMR (100 MHz, DMSO- $d_6$ )  $\delta$  166.1, 134.0, 132.2, 132.1, 128.8, 127.8, 127.6, 127.4, 127.2, 126.6, 124.2, 39.0, 31.3, 19.7, 13.7.

MS:m/z 227 ( $\text{M}^+$ ).

*N*-butylpicolinamide (**5k**)<sup>35</sup>

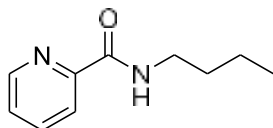

**5k** was obtained in 91% yield (81.10 mg) as a white oil;

$^1\text{H}$  NMR (400 MHz, DMSO- $d_6$ )  $\delta$  8.73 (s, 1H), 8.61 (d,  $J = 4.7$  Hz, 1H), 8.02 (d,  $J = 7.7$  Hz, 1H), 7.96 (t,  $J = 7.8$  Hz, 1H), 7.56 (t,  $J = 6.1$  Hz, 1H), 3.29 (q,  $J = 6.8$  Hz, 2H), 1.52 – 1.46 (m, 2H), 1.28 (q,  $J = 7.5$  Hz, 2H), 0.86 (t,  $J = 7.3$  Hz, 3H).

$^{13}\text{C}$  NMR (100 MHz, DMSO- $d_6$ )  $\delta$  163.7, 150.0, 148.3, 137.7, 126.3, 121.7, 38.4, 31.2, 19.5, 13.6.

MS:m/z 178 ( $\text{M}^+$ ).

*N*-butylthiophene-2-carboxamide (**5l**)<sup>36</sup>

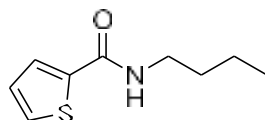

**5l** was obtained in 90% yield (82.50 mg) as a yellow oil;

$^1\text{H}$  NMR (400 MHz,  $\text{CDCl}_3$ )  $\delta$  7.58 (d,  $J = 3.7$  Hz, 1H), 7.41 (d,  $J = 4.9$  Hz, 1H), 7.01 (d,  $J = 4.3$  Hz, 1H), 6.78 (s, 1H), 3.37 (q,  $J = 6.8$  Hz, 2H), 1.54 (t,  $J = 7.6$  Hz, 2H), 1.33 (q,  $J = 7.4$  Hz, 2H), 0.88 (t,  $J = 7.3$  Hz, 3H).

$^{13}\text{C}$  NMR (100 MHz,  $\text{CDCl}_3$ )  $\delta$  162.2, 139.4, 129.8, 127.9, 127.6, 39.8, 31.7, 20.2, 13.8.

MS:m/z 183 ( $\text{M}^+$ ).

*N*-butyl-1*H*-indole-3-carboxamide (**5m**)<sup>37</sup>

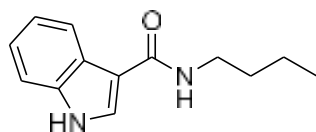

**5m** was obtained in 78% yield (84.40 mg) as a white solid;

$^1\text{H}$  NMR (400 MHz,  $\text{CDCl}_3$ )  $\delta$  10.12 (s, 1H), 7.91 (d,  $J = 6.4$  Hz, 1H), 7.60 (d,  $J = 4.0$  Hz, 1H), 7.40 (d,  $J = 3.8$  Hz, 1H), 7.25 – 7.14 (m, 2H), 6.15 (s, 1H), 3.50 (q,  $J = 6.6$  Hz, 2H), 1.68 – 1.56 (m, 2H), 1.42 (q,  $J = 7.4$  Hz, 2H), 0.95 (t,  $J = 7.0$  Hz, 3H).

$^{13}\text{C}$  NMR (100 MHz,  $\text{CDCl}_3$ )  $\delta$  166.2, 136.7, 128.5, 124.6, 122.8, 121.5, 119.6, 112.5, 112.0, 39.5, 32.1, 20.4, 14.0.

MS:m/z 216 ( $\text{M}^+$ ).

*N1,N3*-dibutylisophthalamide (**5n**)<sup>38</sup>

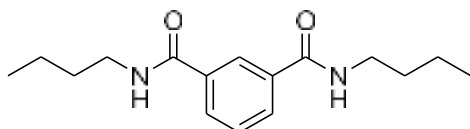

**5n** was obtained in 92% yield (127.10 mg) as a white solid;

<sup>1</sup>H NMR (400 MHz, DMSO-*d*<sub>6</sub>) δ 8.54 (t, *J* = 5.7 Hz, 2H), 8.28 (s, 1H), 7.94 (d, *J* = 8.7 Hz, 2H), 7.53 (t, *J* = 7.7 Hz, 1H), 3.27 (q, *J* = 6.6 Hz, 4H), 1.55 – 1.45 (m, 4H), 1.33 (q, *J* = 7.5 Hz, 4H), 0.90 (t, *J* = 7.3 Hz, 6H).

<sup>13</sup>C NMR (100 MHz, DMSO-*d*<sub>6</sub>) δ 165.8, 134.9, 129.5, 128.2, 126.1, 38.9, 31.2, 19.7, 13.7.

MS:m/z 276 (M<sup>+</sup>).

**N-butyl-2-phenylacetamide (5o)**<sup>39</sup>

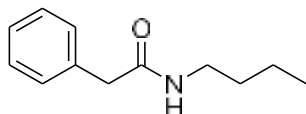

**5o** was obtained in 90% yield (86.10 mg) as a white oil;

<sup>1</sup>H NMR (400 MHz, DMSO-*d*<sub>6</sub>) δ 8.07 (s, 1H), 7.30 – 7.24 (m, 4H), 7.24 – 7.16 (m, 1H), 3.40 (s, 2H), 3.05 (q, *J* = 6.8 Hz, 2H), 1.42 – 1.32 (m, 2H), 1.30 – 1.20 (m, 2H), 0.84 (t, *J* = 7.3 Hz, 3H).

<sup>13</sup>C NMR (100 MHz, DMSO-*d*<sub>6</sub>) δ 170.4, 136.7, 129.1, 128.3, 126.5, 42.7, 38.6, 31.4, 19.7, 13.8.

MS:m/z 191 (M<sup>+</sup>).

**N-phenylacetamide (5p)**<sup>40</sup>

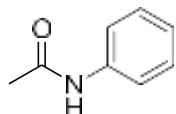

**5p** was obtained in 89% yield (60.20 mg) as a white solid;

<sup>1</sup>H NMR (400 MHz, CDCl<sub>3</sub>) δ 8.41 (s, 1H), 7.41 (d, *J* = 8.0 Hz, 2H), 7.16 (t, *J* = 7.8 Hz, 2H), 6.97 (t, *J* = 7.4 Hz, 1H), 2.01 (s, 3H).

<sup>13</sup>C NMR (100 MHz, CDCl<sub>3</sub>) δ 169.3, 138.2, 128.9, 124.3, 120.3, 24.3.

MS:m/z 135 (M<sup>+</sup>).

**N-phenylbutyramide (5q)**<sup>41</sup>

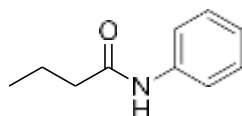

**5q** was obtained in 94% yield (76.70 mg) as a white solid;

<sup>1</sup>H NMR (400 MHz, CDCl<sub>3</sub>) δ 7.99 (s, 1H), 7.50 (d, *J* = 7.9 Hz, 2H), 7.24 (t, *J* = 7.8 Hz, 2H), 7.04 (t, *J* = 7.4 Hz, 1H), 2.28 (t, *J* = 7.5 Hz, 2H), 1.69 (q, *J* = 7.5 Hz, 2H), 0.93 (t, *J* = 7.3 Hz, 3H).

<sup>13</sup>C NMR (100 MHz, CDCl<sub>3</sub>) δ 172.0, 138.2, 128.9, 124.2, 120.1, 39.6, 19.2, 13.8.

MS:m/z 163 (M<sup>+</sup>).

**N-phenylisobutyramide (5r)**<sup>41</sup>

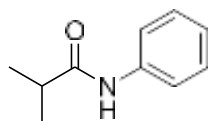

**5r** was obtained in 91% yield (74.30 mg) as a white solid;

$^1\text{H NMR}$  (400 MHz,  $\text{CDCl}_3$ )  $\delta$  8.07 (s, 1H), 7.47 (d,  $J = 8.0$  Hz, 2H), 7.17 (t,  $J = 7.7$  Hz, 2H), 6.98 (t,  $J = 7.4$  Hz, 1H), 2.57 – 2.37 (m, 1H), 1.11 (d,  $J = 7.0$  Hz, 6H).

$^{13}\text{C NMR}$  (100 MHz,  $\text{CDCl}_3$ )  $\delta$  176.1, 138.3, 128.8, 124.1, 120.2, 36.4, 19.6.

MS:m/z 163 ( $\text{M}^+$ ).

***N*-phenylcyclohexanecarboxamide (5s)**<sup>42</sup>

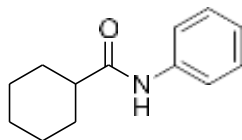

**5s** was obtained in 93% yield (94.50 mg) as a white solid;

$^1\text{H NMR}$  (400 MHz, Chloroform-*d*)  $\delta$  7.56 (s, 1H), 7.45 (d,  $J = 8.0$  Hz, 2H), 7.18 (t,  $J = 7.9$  Hz, 2H), 6.97 (t,  $J = 7.4$  Hz, 1H), 2.21 – 2.08 (m, 1H), 1.87 – 1.78 (m, 2H), 1.75 – 1.64 (m, 2H), 1.62 – 1.52 (m, 1H), 1.51 – 1.36 (m, 2H), 1.23 – 1.08 (m, 4H).

$^{13}\text{C NMR}$  (100 MHz,  $\text{CDCl}_3$ )  $\delta$  174.8, 138.3, 129.0, 124.1, 120.0, 46.5, 29.7, 25.8, 25.7.

MS:m/z 203 ( $\text{M}^+$ ).

***N*-phenylpivalamide (5t)**<sup>43</sup>

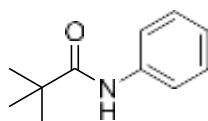

**5t** was obtained in 90% yield (79.80 mg) as a white solid;

$^1\text{H NMR}$  (400 MHz,  $\text{CDCl}_3$ )  $\delta$  7.55 (d,  $J = 8.7$  Hz, 2H), 7.50 (s, 1H), 7.32 (t,  $J = 7.8$  Hz, 2H), 7.13 – 7.07 (m, 1H), 1.33 (s, 9H).

$^{13}\text{C NMR}$  (100 MHz,  $\text{CDCl}_3$ )  $\delta$  176.7, 138.1, 128.9, 124.2, 120.2, 39.6, 27.7.

MS:m/z 177 ( $\text{M}^+$ ).

**(3*r*,5*r*,7*r*)-*N*-phenyladamantane-1-carboxamide (5u)**<sup>44</sup>

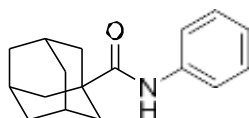

**5u** was obtained in 75% yield (95.80 mg) as a white solid;

$^1\text{H NMR}$  (400 MHz,  $\text{CDCl}_3$ )  $\delta$  7.54 (d,  $J = 8.0$  Hz, 2H), 7.31 (t,  $J = 7.7$  Hz, 3H), 7.09 (t,  $J = 7.4$  Hz, 1H), 2.06 (br, 3H), 1.99 – 1.92 (m, 6H), 1.82 – 1.68 (m, 6H).

$^{13}\text{C NMR}$  (100 MHz,  $\text{CDCl}_3$ )  $\delta$  176.1, 138.2, 129.0, 124.2, 120.1, 41.6, 39.4, 36.6, 28.3.

MS:m/z 255 ( $\text{M}^+$ ).

***N*-phenylbenzamide (5v)**<sup>26</sup>

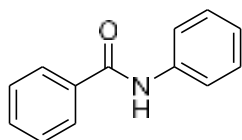

**5v** was obtained in 90% yield (88.70 mg) as a white solid;

$^1\text{H}$  NMR (400 MHz, DMSO- $d_6$ )  $\delta$  10.28 (s, 1H), 7.97 (d,  $J = 7.3$  Hz, 2H), 7.81 (d,  $J = 8.0$  Hz, 2H), 7.61 – 7.51 (m, 3H), 7.36 (t,  $J = 7.8$  Hz, 2H), 7.11 (t,  $J = 7.4$  Hz, 1H).

$^{13}\text{C}$  NMR (100 MHz, DMSO- $d_6$ )  $\delta$  165.6, 139.2, 135.0, 131.5, 128.6, 128.4, 127.7, 123.7, 120.4.

MS:m/z 197 ( $\text{M}^+$ ).

***N*-phenyl-3-(trifluoromethyl)benzamide (5w)**<sup>45</sup>

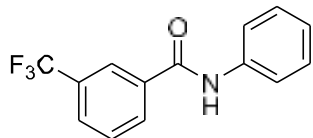

**5w** was obtained in 84% yield (111.40 mg) as a white solid;

$^1\text{H}$  NMR (400 MHz, DMSO- $d_6$ )  $\delta$  10.47 (s, 1H), 8.34 – 8.21 (m, 2H), 7.95 (d,  $J = 7.8$  Hz, 1H), 7.79 (d,  $J = 8.0$  Hz, 3H), 7.38 (t,  $J = 7.8$  Hz, 2H), 7.13 (t,  $J = 7.4$  Hz, 1H).

$^{13}\text{C}$  NMR (100 MHz, DMSO- $d_6$ )  $\delta$  164.0, 138.8, 135.8, 131.8, 129.6, 129.3, 129.2 – 128.5 (m), 128.0 (d,  $J = 3.7$  Hz), 125.3, 124.6 – 123.9 (m), 122.6, 120.5.

$^{19}\text{F}$  NMR (376 MHz, DMSO- $d_6$ )  $\delta$  -61.15.

MS:m/z 265 ( $\text{M}^+$ ).

***3,4,5*-trimethoxy-*N*-phenylbenzamide (5x)**<sup>46</sup>

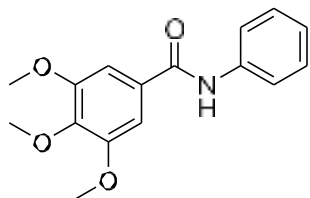

**5x** was obtained in 87% (124.90 mg) as a white solid;

$^1\text{H}$  NMR (400 MHz,  $\text{CDCl}_3$ )  $\delta$  8.39 (s, 1H), 7.62 (d,  $J = 8.6$  Hz, 2H), 7.30 (t,  $J = 7.8$  Hz, 2H), 7.17 – 7.07 (m, 1H), 7.04 (s, 2H), 3.85 (s, 3H), 3.78 (s, 6H).

$^{13}\text{C}$  NMR (100 MHz,  $\text{CDCl}_3$ )  $\delta$  166.0, 153.2, 141.0, 138.1, 130.4, 129.0, 124.6, 120.6, 104.6, 60.9, 56.2.

MS:m/z 287 ( $\text{M}^+$ ).

***N*-butylbenzothioamide (5y)**<sup>47</sup>

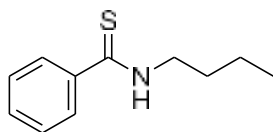

**5y** was obtained in 92% yield (88.90 mg) as a yellow oil;

$^1\text{H}$  NMR (400 MHz, DMSO- $d_6$ )  $\delta$  10.25 (s, 1H), 7.72 (d,  $J = 7.9$  Hz, 2H), 7.46 (d,  $J = 7.1$  Hz, 1H), 7.41 (t,  $J = 7.4$  Hz, 2H), 3.69 (q,  $J = 6.7$  Hz, 2H), 1.73 – 1.59 (m, 2H), 1.37 (q,  $J = 7.5$  Hz, 2H), 0.92 (t,  $J = 7.3$  Hz, 3H).

$^{13}\text{C}$  NMR (100 MHz, DMSO- $d_6$ )  $\delta$  197.0, 141.5, 130.4, 127.9, 127.2, 45.9, 29.3, 19.8, 13.8.

MS:m/z 193 ( $\text{M}^+$ ).

***N*-butylthiophene-2-carbothioamide (5z)**

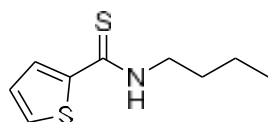

**5z** was obtained in 88% yield (87.70 mg) as a yellow oil;

$^1\text{H NMR}$  (400 MHz,  $\text{CDCl}_3$ )  $\delta$  7.56 (s, 1H), 7.45 (d,  $J = 4.6$  Hz, 1H), 7.42 (d,  $J = 3.7$  Hz, 1H), 7.06 – 6.99 (m, 1H), 3.83 – 3.70 (m, 2H), 1.71 (t,  $J = 7.5$  Hz, 2H), 1.43 (q,  $J = 7.5$  Hz, 2H), 0.96 (t,  $J = 7.4$  Hz, 3H).

$^{13}\text{C NMR}$  (100 MHz,  $\text{CDCl}_3$ )  $\delta$  188.6, 146.8, 132.0, 127.8, 124.5, 46.3, 30.4, 20.4, 13.9.

HRMS (ESI)  $m/z$  calcd. for  $\text{C}_9\text{H}_{13}\text{NS}_2$   $[\text{M}+\text{H}]^+$ : 200.0562, found 200.0571.

*N*-butylpyridine-2-carbothioamide (**5aa**)<sup>48</sup>

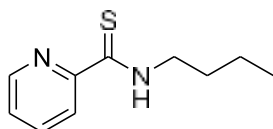

**5aa** was obtained in 91% yield (88.40 mg) as a yellow oil;

$^1\text{H NMR}$  (400 MHz,  $\text{CDCl}_3$ )  $\delta$  10.12 (s, 1H), 8.63 (d,  $J = 6.9$  Hz, 1H), 8.41 (d,  $J = 3.4$  Hz, 1H), 7.74 (t,  $J = 7.7$  Hz, 1H), 7.42 – 7.29 (m, 1H), 3.80 (q,  $J = 6.6$  Hz, 2H), 1.75 – 1.61 (m, 2H), 1.41 (q,  $J = 7.5$  Hz, 2H), 0.92 (t,  $J = 7.4$  Hz, 3H).

$^{13}\text{C NMR}$  (100 MHz,  $\text{CDCl}_3$ )  $\delta$  190.3, 151.0, 146.8, 137.1, 125.8, 124.6, 45.4, 30.0, 20.3, 13.7.

MS:  $m/z$  194 ( $\text{M}^+$ ).

*N*-benzylethanethioamide (**5ab**)<sup>49</sup>

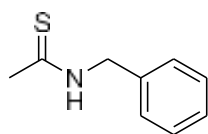

**5ab** was obtained in 90% yield (74.40mg) as a yellow solid;

$^1\text{H NMR}$  (400 MHz,  $\text{CDCl}_3$ )  $\delta$  7.85 (s, 1H), 7.35 (d,  $J = 7.0$  Hz, 5H), 4.80 (d,  $J = 5.4$  Hz, 2H), 2.55 (s, 3H).

$^{13}\text{C NMR}$  (100 MHz,  $\text{CDCl}_3$ )  $\delta$  200.9, 136.0, 128.9, 128.3, 128.1, 50.4, 33.9.

MS:  $m/z$  165 ( $\text{M}^+$ ).

*N*-benzylcyclopropanecarbothioamide (**5ac**)<sup>50</sup>

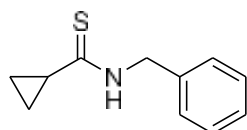

**5ac** was obtained in 90% yield (86.10 mg) as a yellow solid;

$^1\text{H NMR}$  (400 MHz,  $\text{CDCl}_3$ )  $\delta$  7.65 (s, 1H), 7.13 (d,  $J = 7.5$  Hz, 5H), 4.62 (d,  $J = 5.3$  Hz, 2H), 1.65 (s, 1H), 1.13 – 1.06 (m, 2H), 0.72 (m, 2H).

$^{13}\text{C NMR}$  (100 MHz,  $\text{CDCl}_3$ )  $\delta$  207.1, 136.2, 128.8, 128.2, 127.9, 50.1, 24.3, 12.1.

MS:  $m/z$  191 ( $\text{M}^+$ ).

*Manefix*<sup>51</sup>

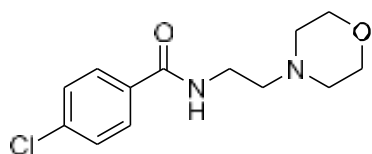

**Manefix** was obtained in 87% yield (116.90 mg) as a white solid;

$^1\text{H NMR}$  (400 MHz,  $\text{CDCl}_3$ )  $\delta$  7.69 (d,  $J = 8.2$  Hz, 2H), 7.37 (d,  $J = 8.3$  Hz, 2H), 6.90 (s, 1H), 3.70 (t,  $J = 4.6$  Hz, 4H), 3.52 (q,  $J = 5.6$  Hz, 2H), 2.61 (t,  $J = 6.0$  Hz, 2H), 2.51 (t,  $J = 4.6$  Hz, 4H).

$^{13}\text{C NMR}$  (100 MHz,  $\text{CDCl}_3$ )  $\delta$  166.3, 137.2, 132.7, 128.5, 128.3, 66.7, 56.8, 53.2, 36.2.

MS:m/z 268 ( $\text{M}^+$ ).

**Fasentin**<sup>52</sup>

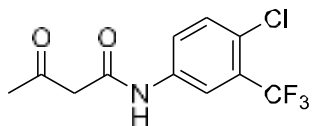

**Fasentin** was obtained in 82% yield (114.60 mg) as a white oil;

$^1\text{H NMR}$  (400 MHz,  $\text{CDCl}_3$ )  $\delta$  7.23 (d,  $J = 8.8$  Hz, 1H), 6.84 (s, 1H), 6.62 (d,  $J = 7.9$  Hz, 1H), 3.78 (s, 1H), 3.14 (q,  $J = 7.1$  Hz, 2H), 1.26 (t,  $J = 7.2$  Hz, 3H).

$^{13}\text{C NMR}$  (100 MHz,  $\text{CDCl}_3$ )  $\delta$  146.9, 132.0, 118.6, 116.2, 112.8 - 111.0 (m), 38.5, 14.6 .

$^{19}\text{F NMR}$  (376 MHz,  $\text{CDCl}_3$ )  $\delta$  -62.73.

MS:m/z 279 ( $\text{M}^+$ ).

**Tubulin inhibitor**<sup>53</sup>

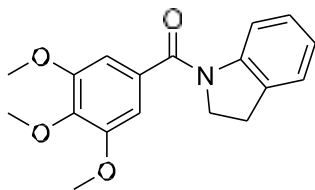

**Tubulin inhibitor** was obtained in 71% yield (111.30 mg) as a white solid;

$^1\text{H NMR}$  (400 MHz,  $\text{CDCl}_3$ )  $\delta$  7.91 (1H),  $\delta$  7.20 (d,  $J = 7.4$  Hz, 1H), 7.11 (s, 1H), 7.00 (t,  $J = 7.3$  Hz, 1H), 6.77 (s, 2H), 4.17 - 4.05 (m, 2H), 3.88 (s, 5H), 3.84 (s, 6H), 3.11 (t,  $J = 8.3$  Hz, 2H).

$^{13}\text{C NMR}$  (100 MHz,  $\text{CDCl}_3$ )  $\delta$  168.6, 153.4, 142.5, 139.7, 132.5, 132.2, 127.3, 125.0, 124.0, 116.7, 104.5, 61.0, 56.3, 50.6, 28.1.

MS:m/z 313 ( $\text{M}^+$ ).

## 5. $^1\text{H}$ , $^{13}\text{C}$ and $^{19}\text{F}$ NMR spectra of products

### $^1\text{H}$ NMR spectra for **3a**

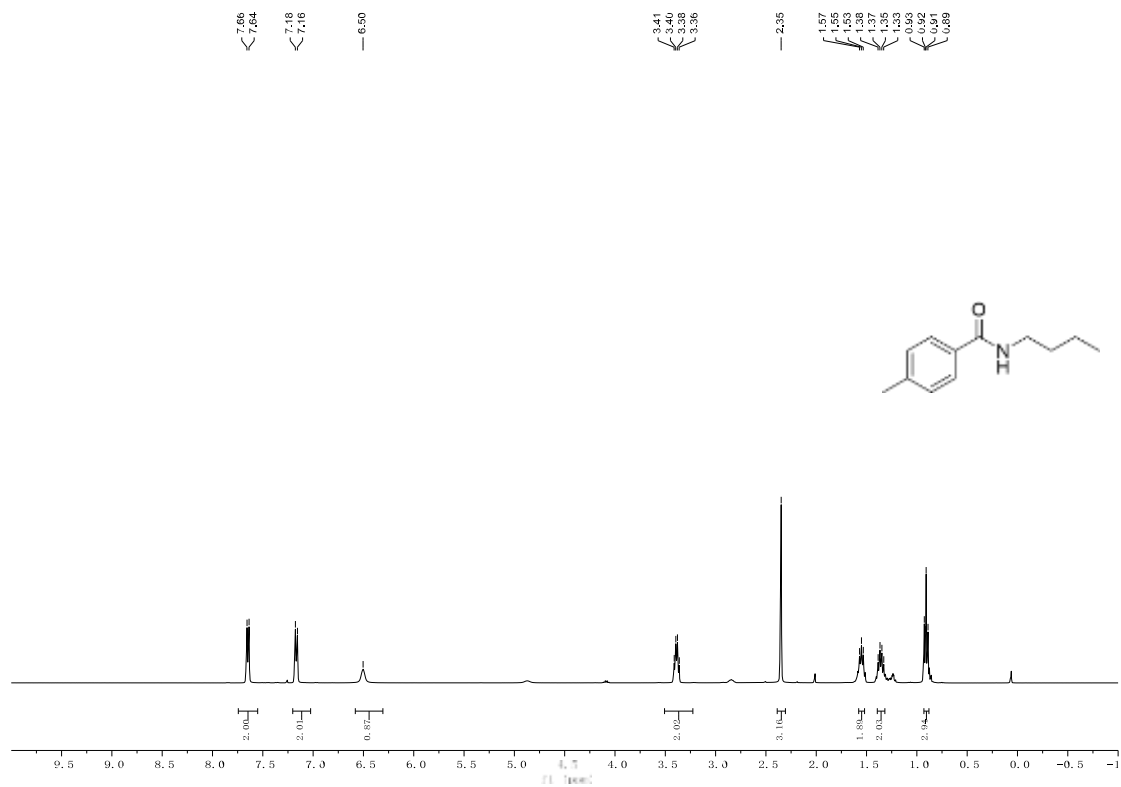

### $^{13}\text{C}$ NMR spectra for **3a**

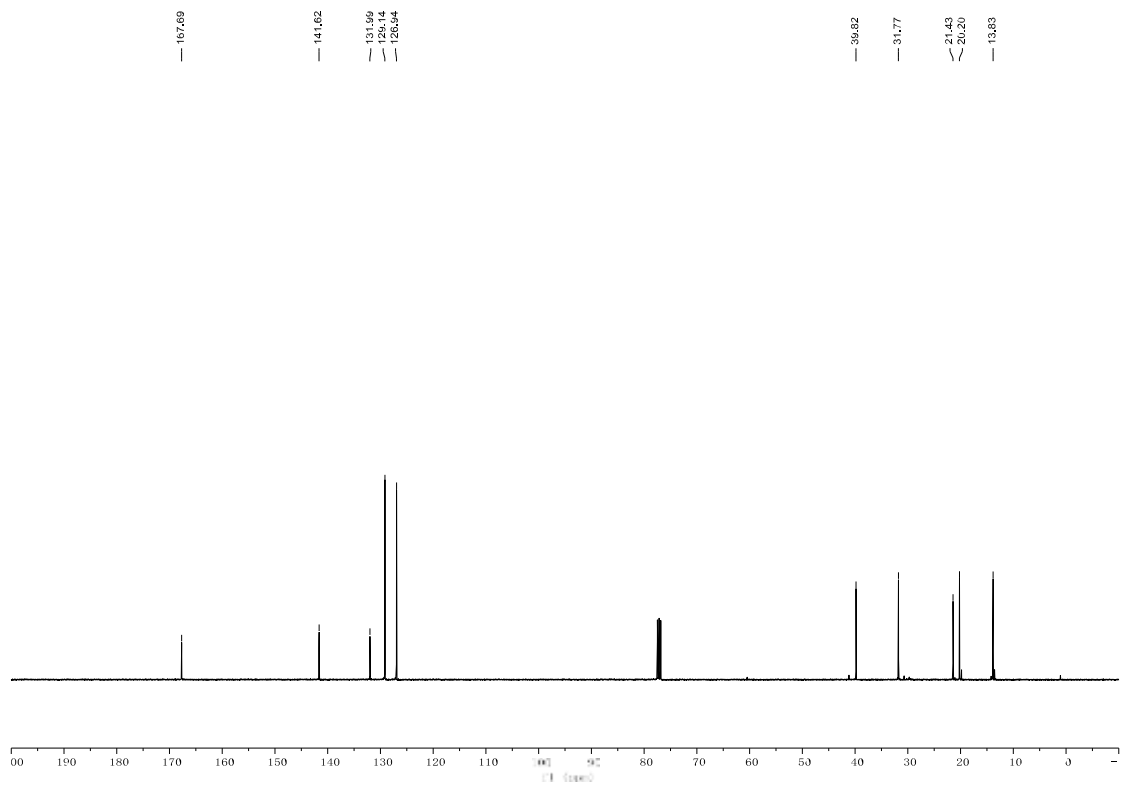



### $^1\text{H}$ NMR spectra for **3b**

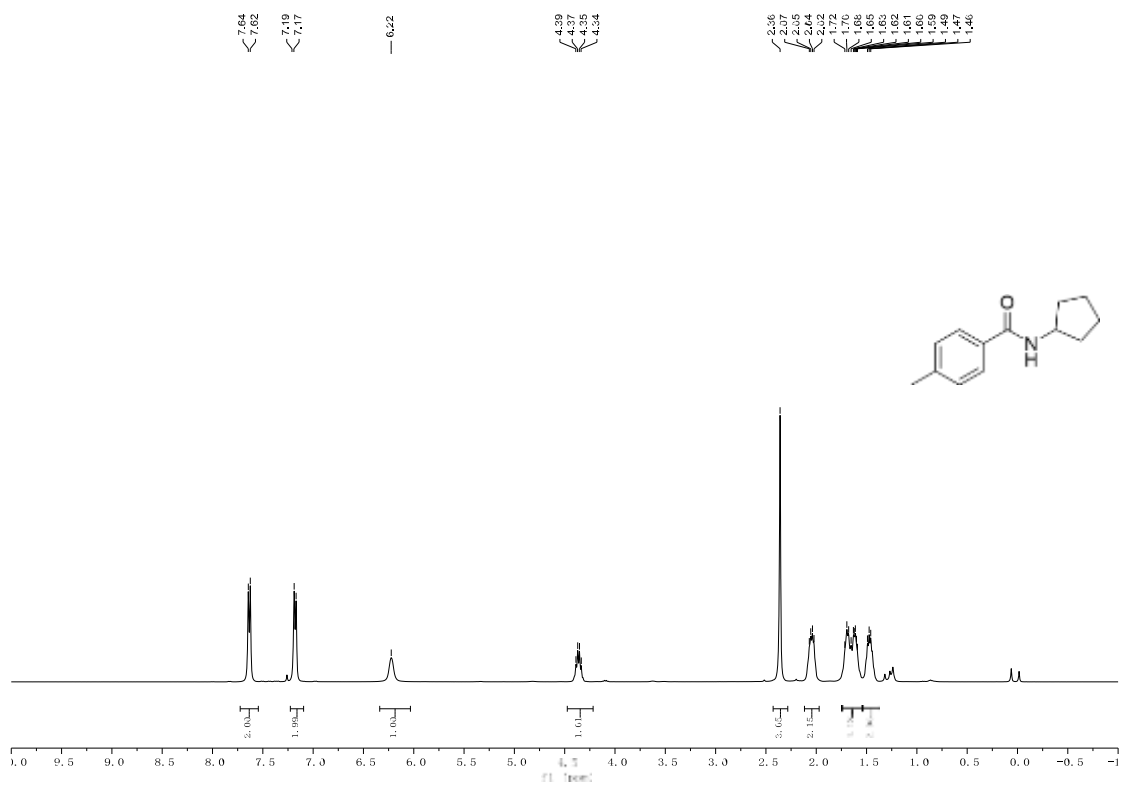

### $^{13}\text{C}$ NMR spectra for **3b**

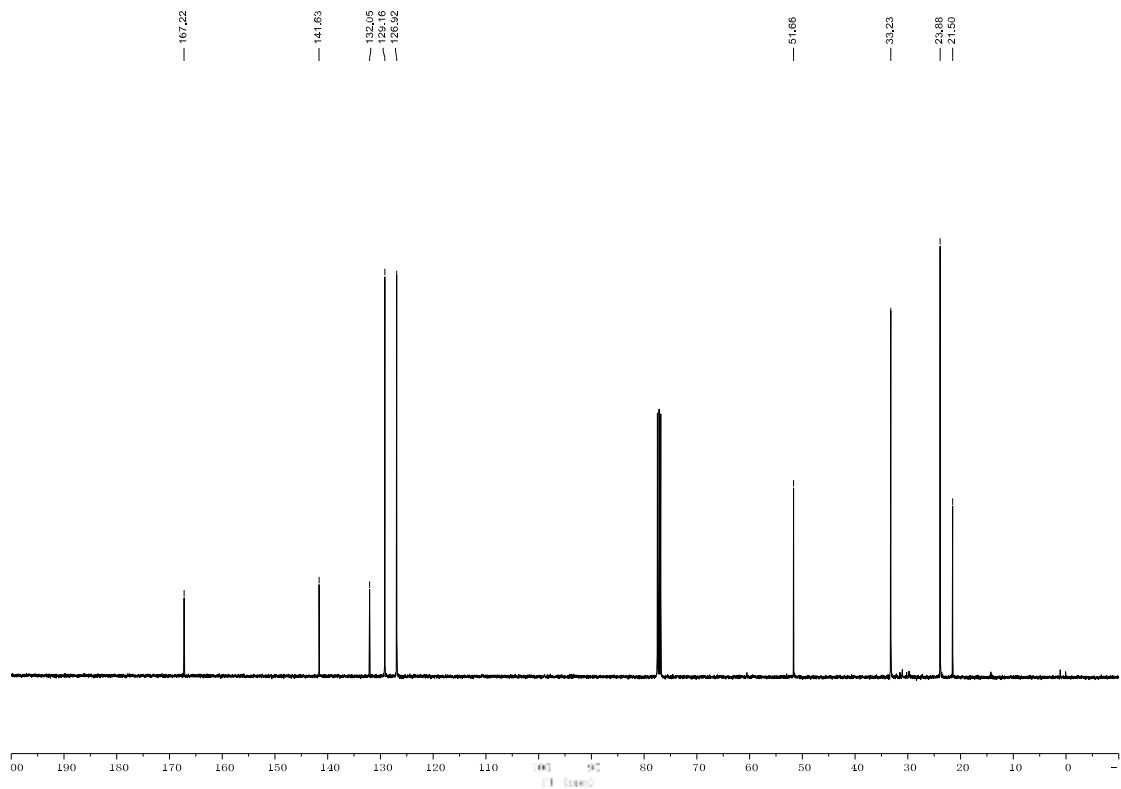

### $^1\text{H}$ NMR spectra for **3c**

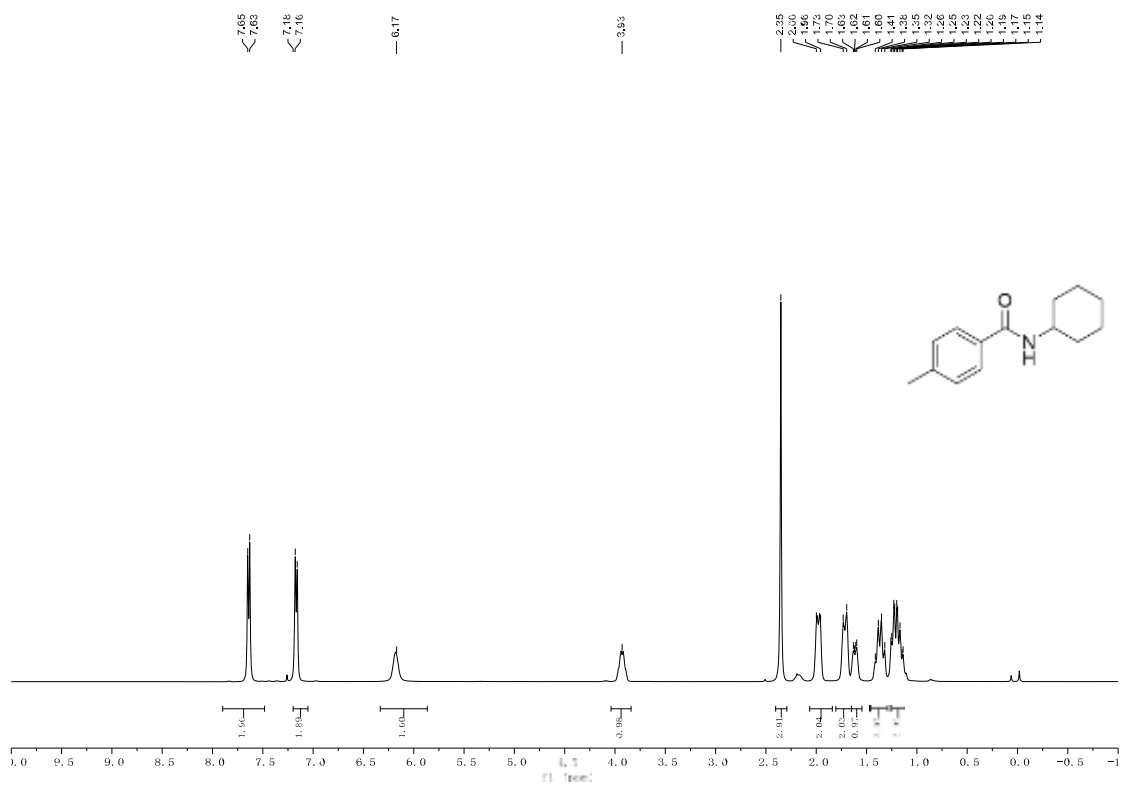

### $^{13}\text{C}$ NMR spectra for **3c**

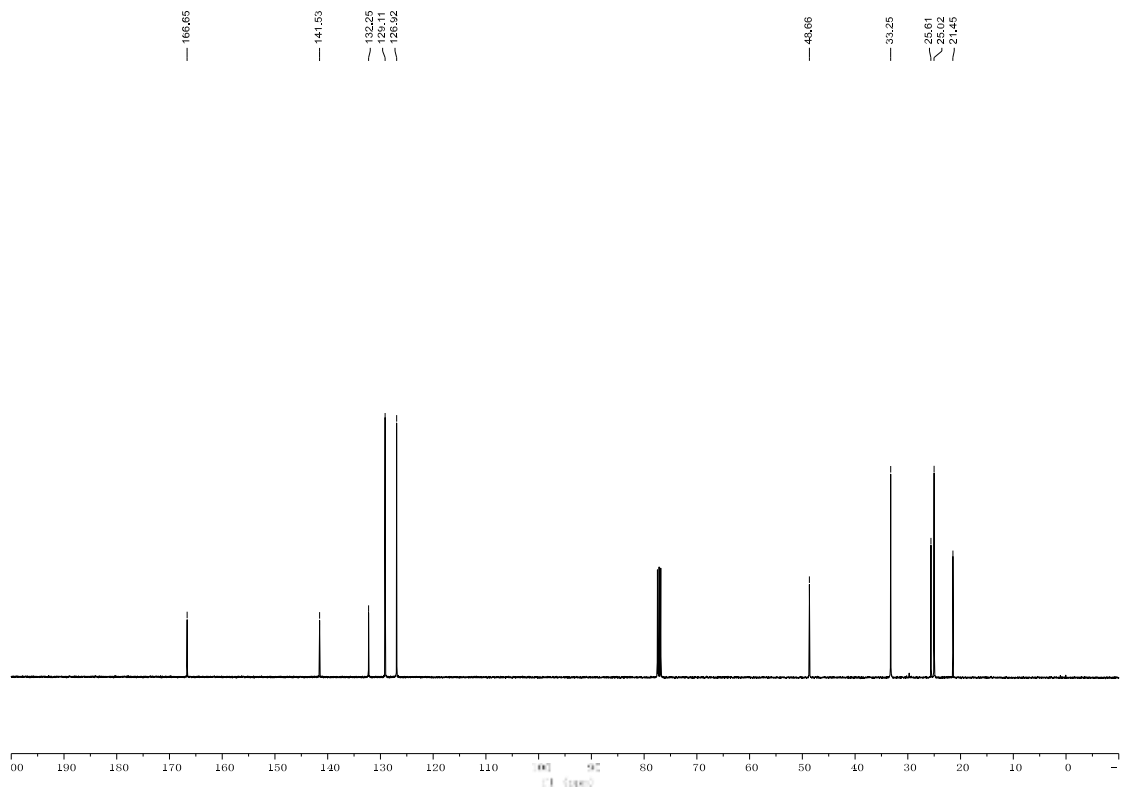

### <sup>1</sup>H NMR spectra for **3d**

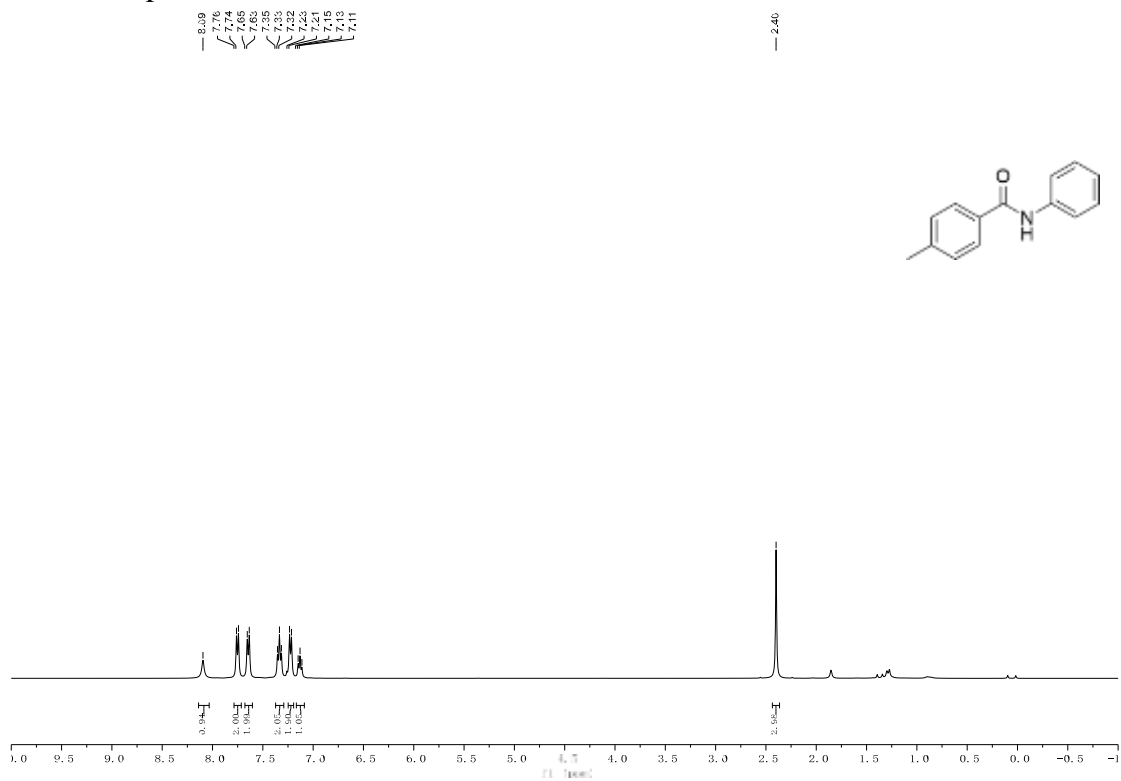

### <sup>13</sup>C NMR spectra for **3d**

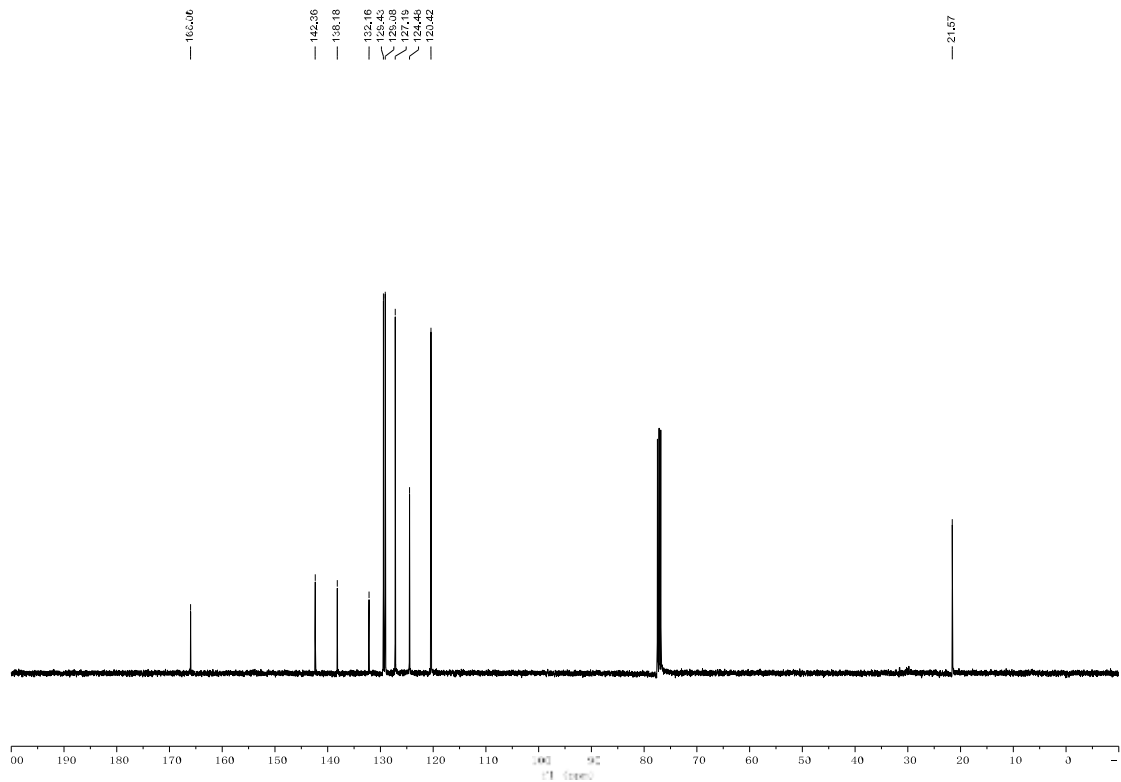

### $^1\text{H}$ NMR spectra for **3e**

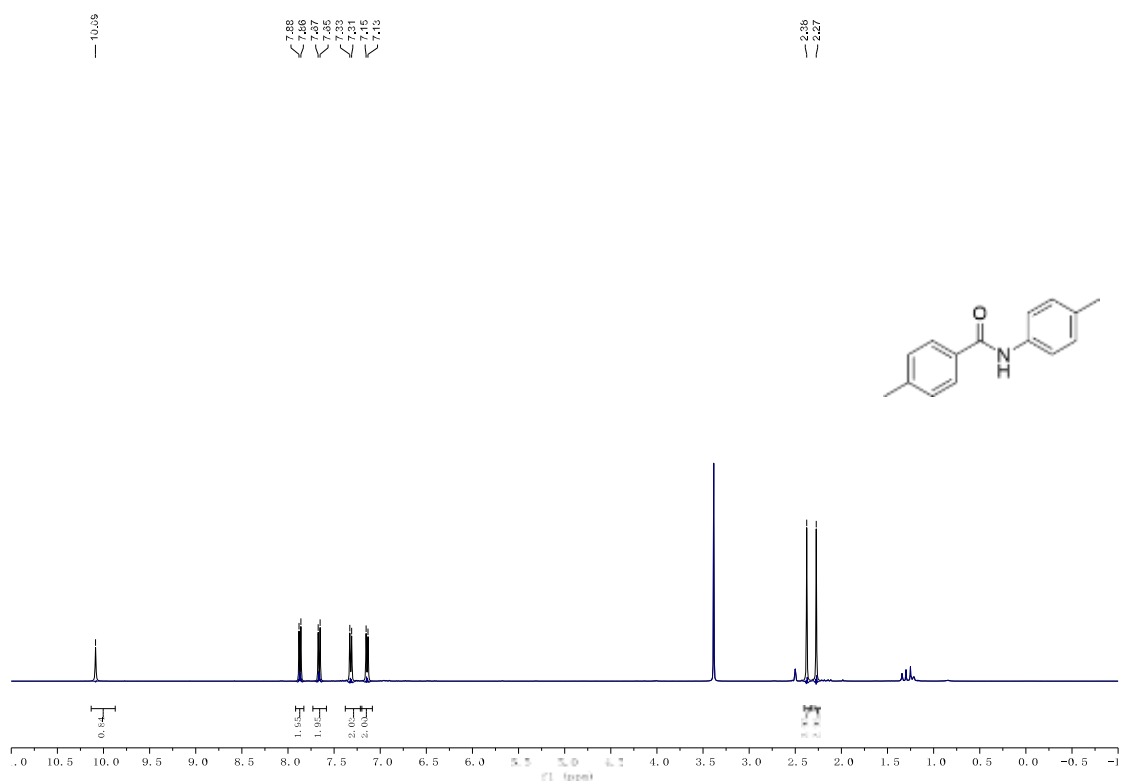

### $^{13}\text{C}$ NMR spectra for **3e**

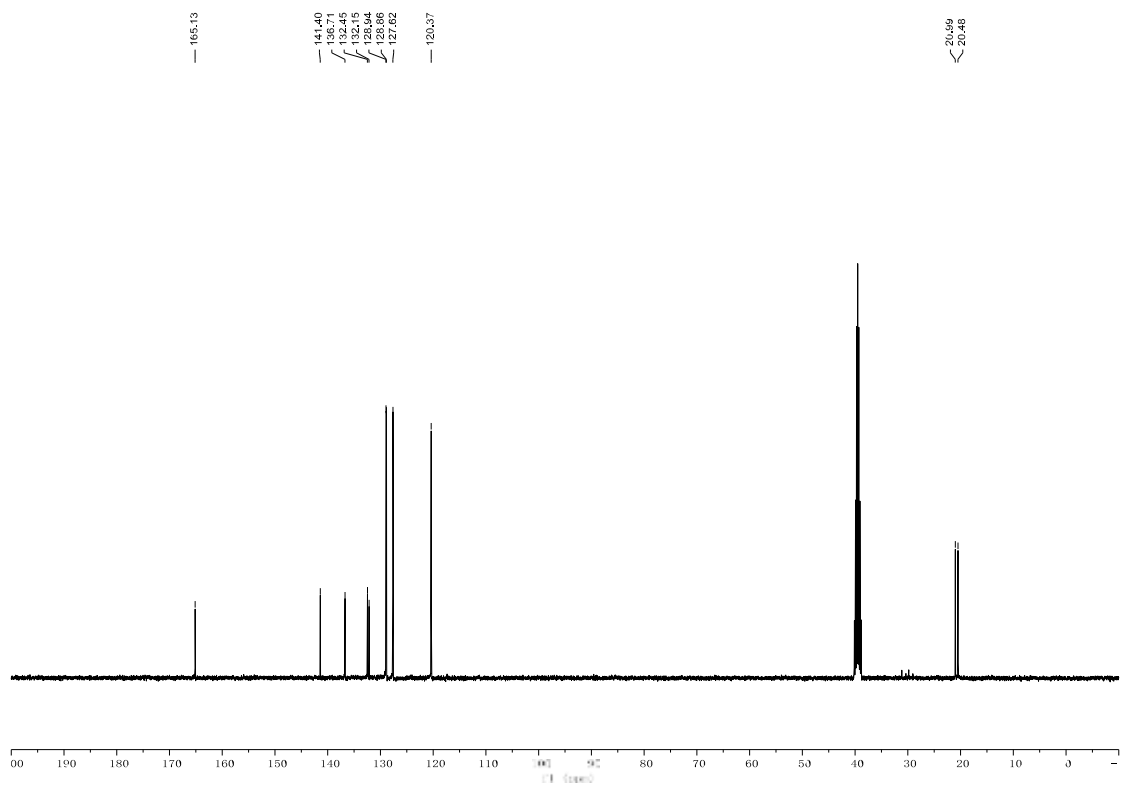

### $^1\text{H}$ NMR spectra for **3f**

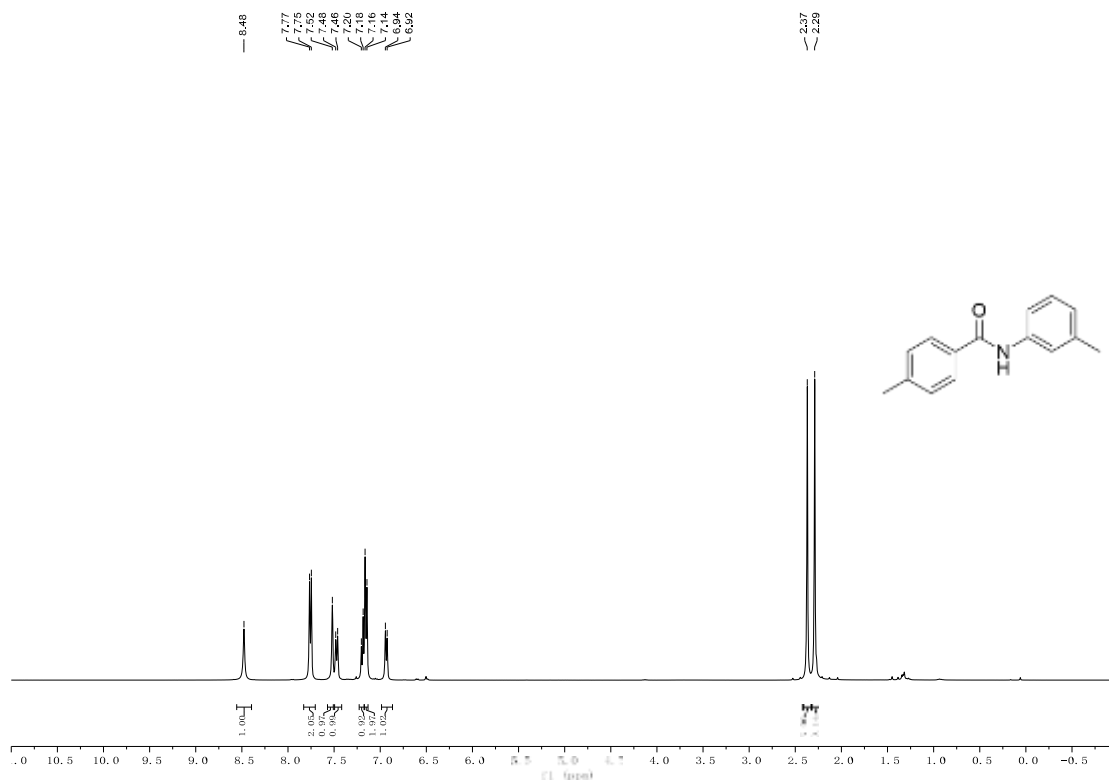

### $^{13}\text{C}$ NMR spectra for **3f**

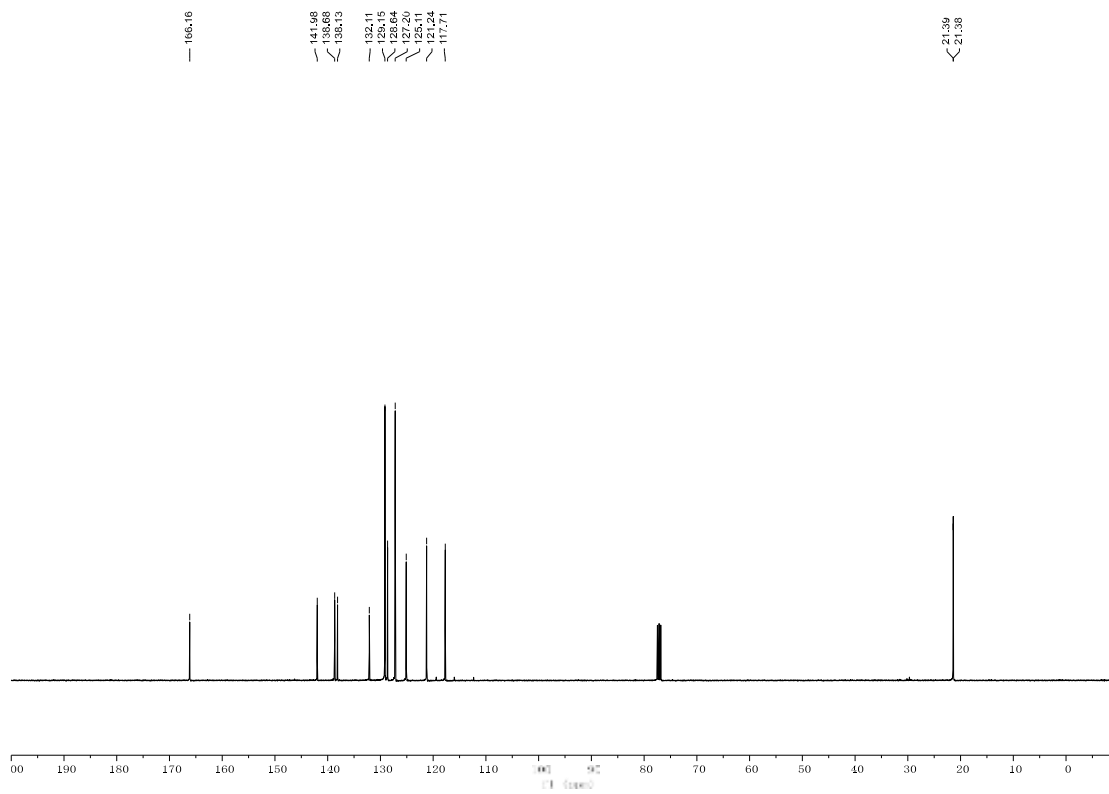

### $^1\text{H}$ NMR spectra for **3g**

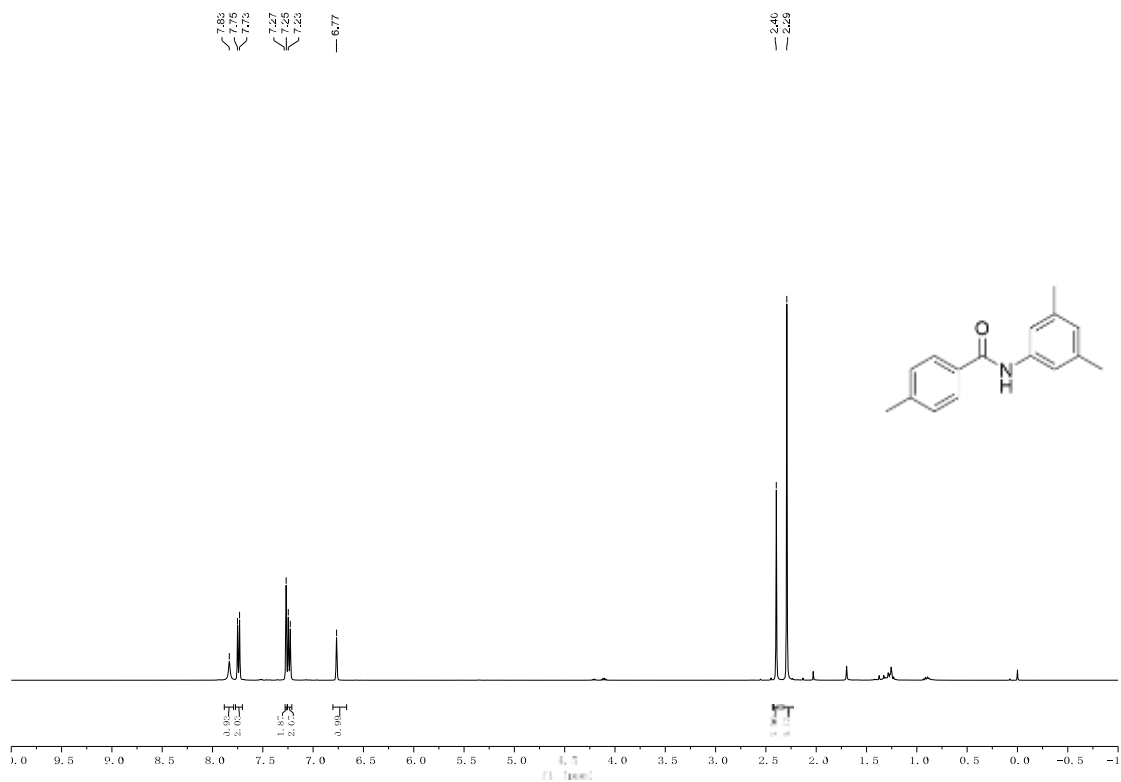

### $^{13}\text{C}$ NMR spectra for **3g**

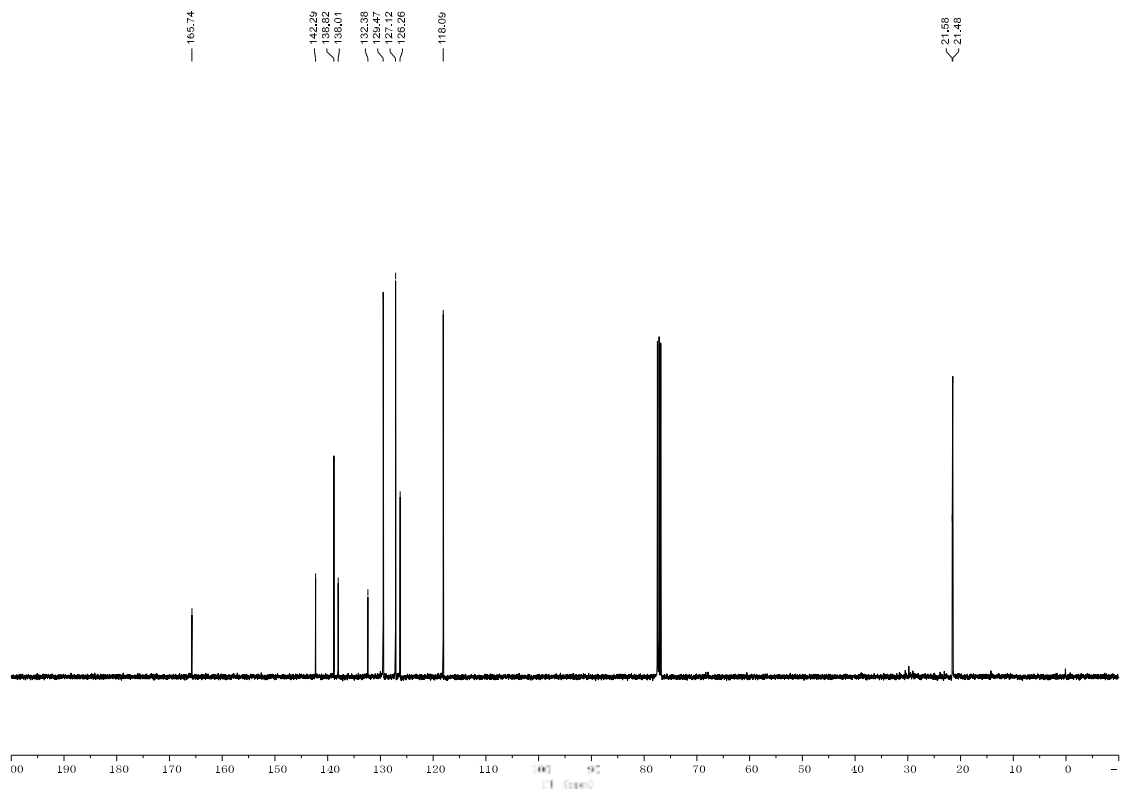

### <sup>1</sup>H NMR spectra for **3h**

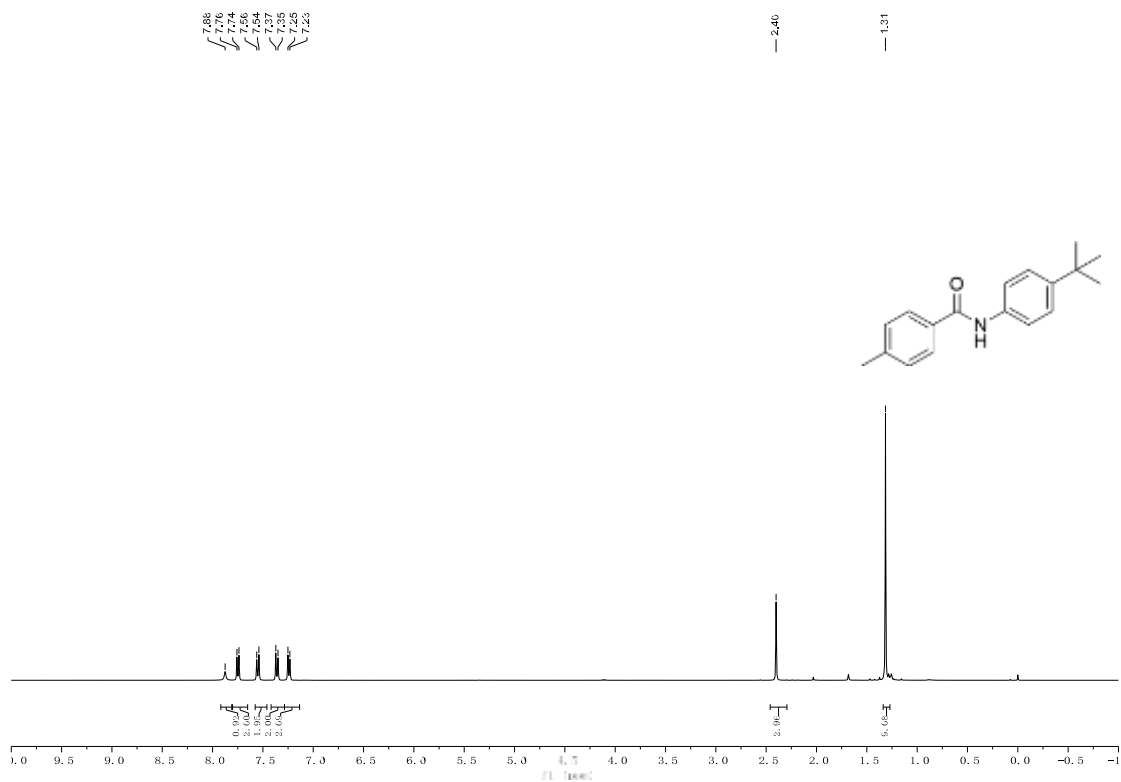

### <sup>13</sup>C NMR spectra for **3h**

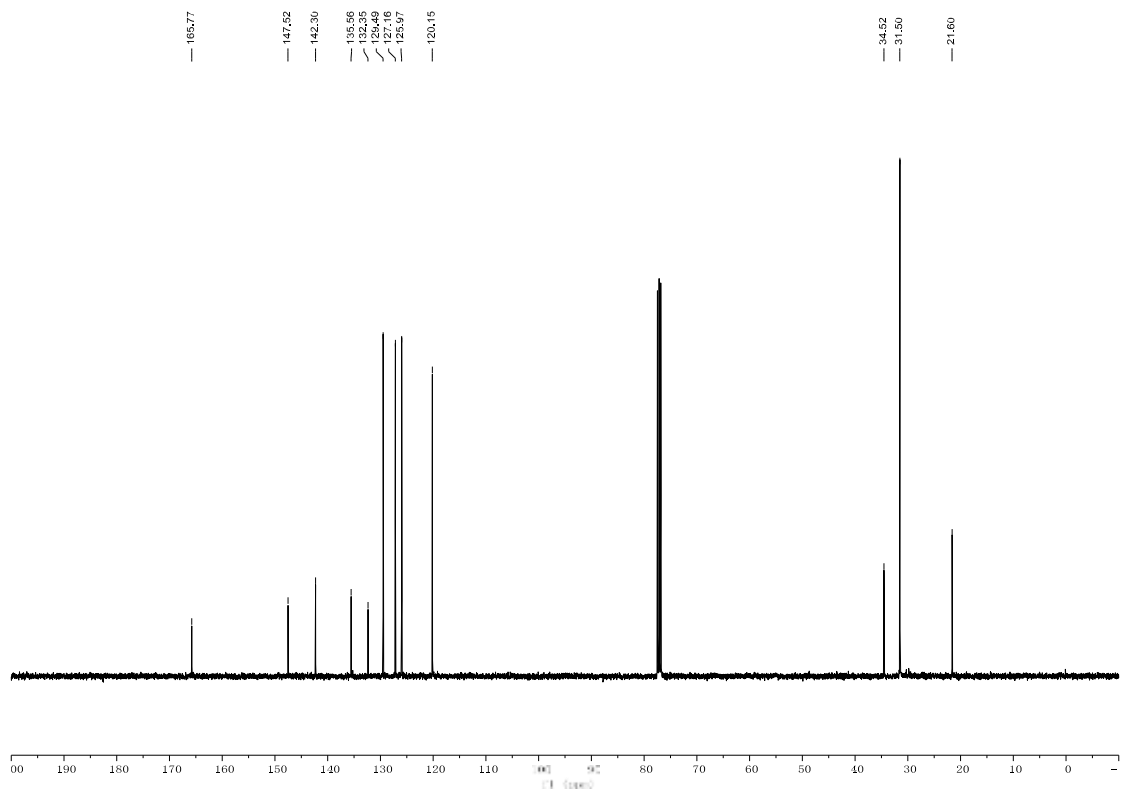

<sup>1</sup>H NMR spectra for **3i**

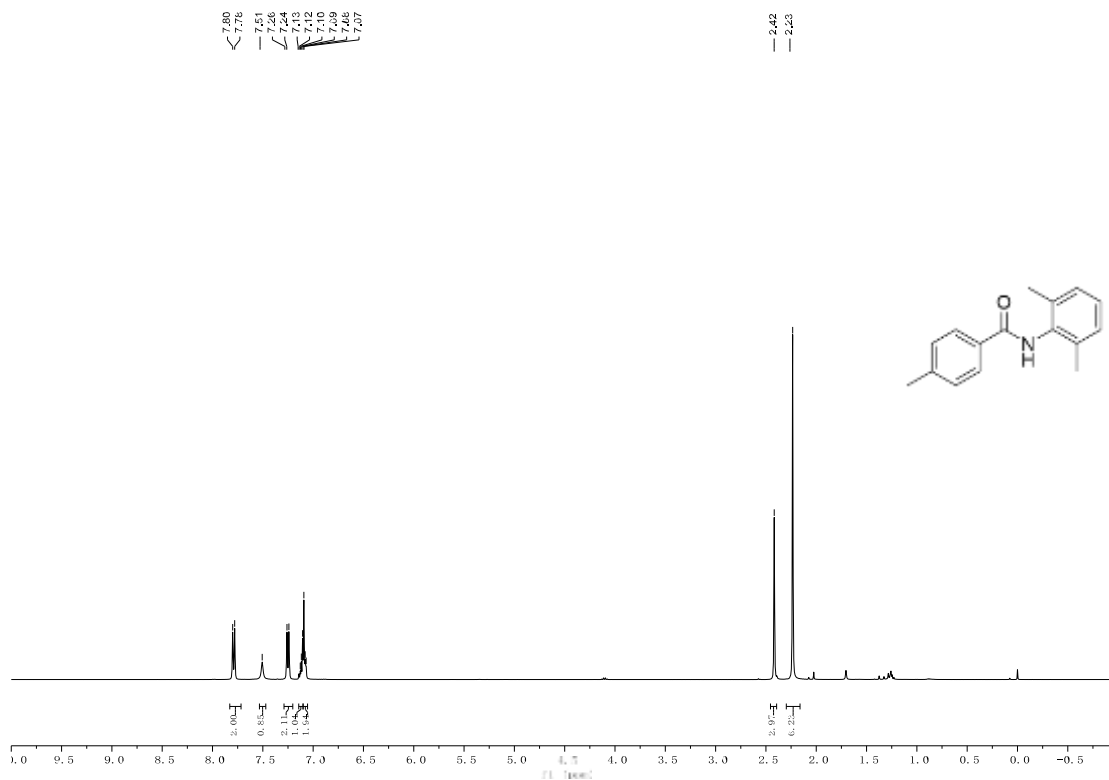

<sup>13</sup>C NMR spectra for **3i**

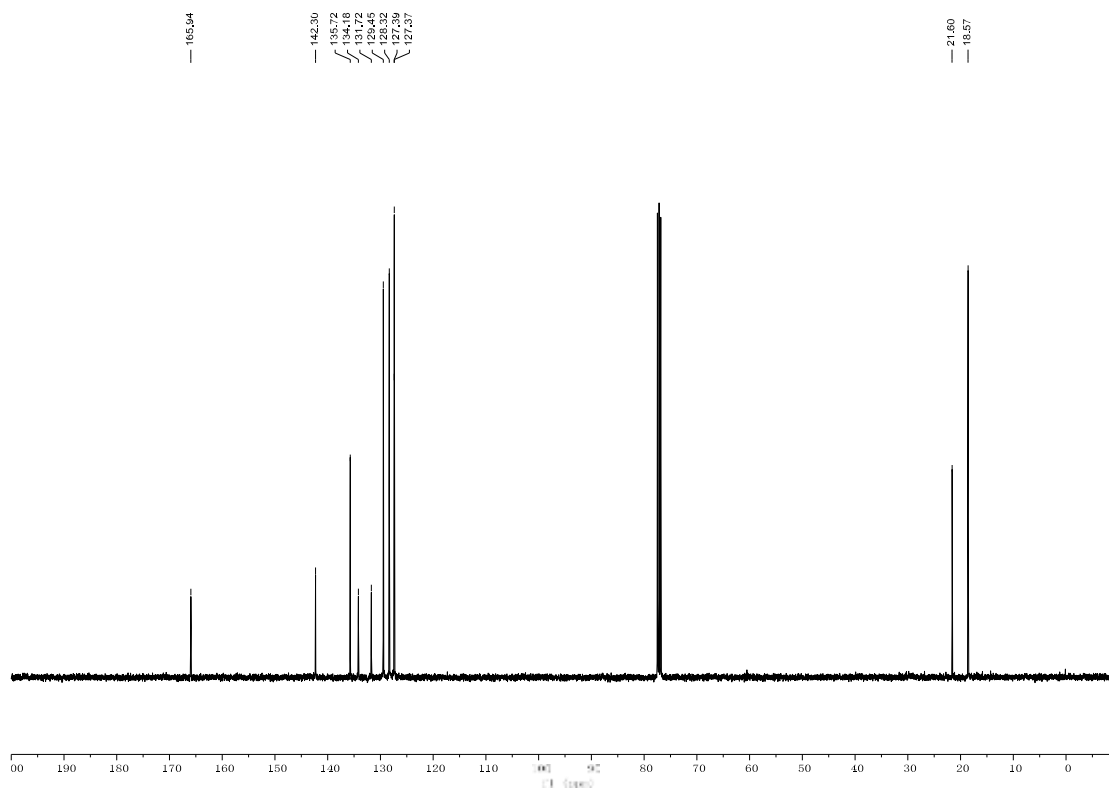





### $^1\text{H}$ NMR spectra for **3k**

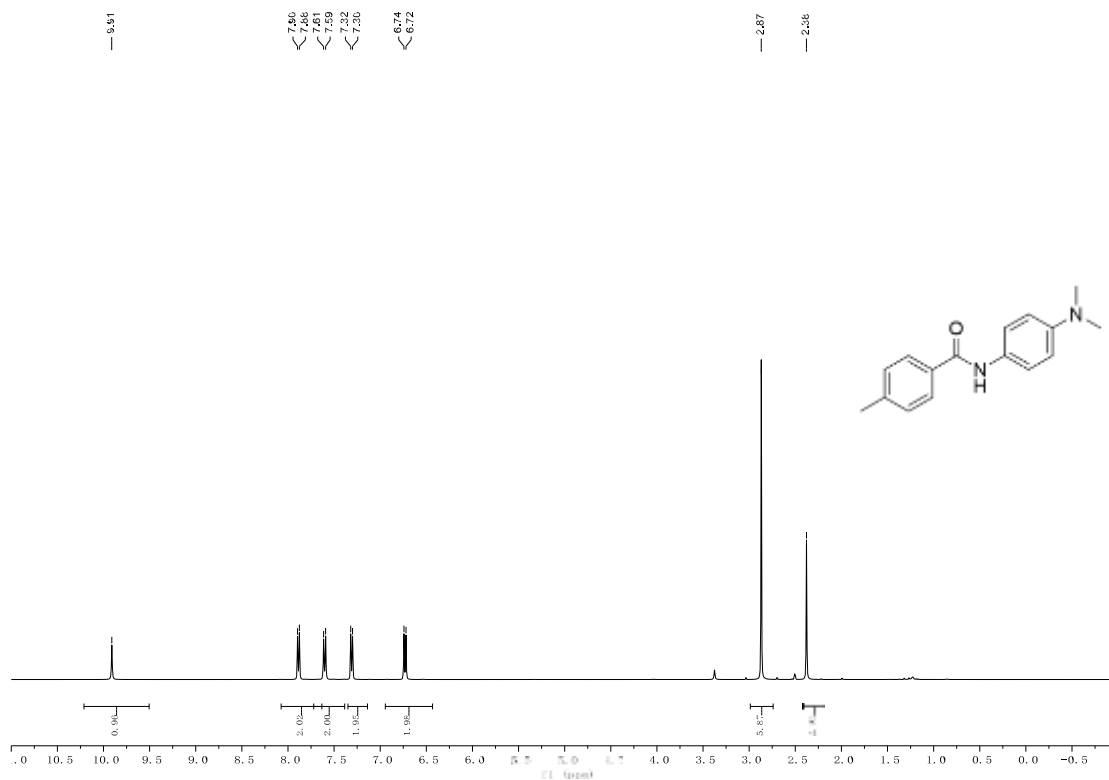

### $^{13}\text{C}$ NMR spectra for **3k**

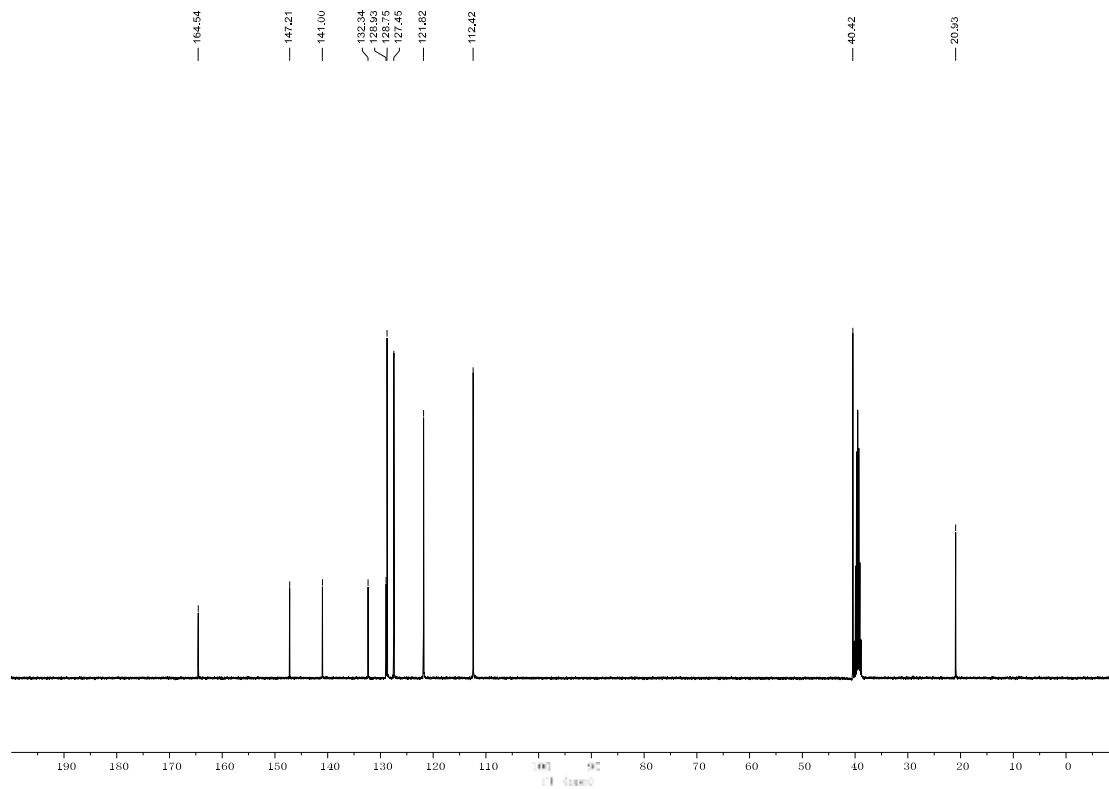

<sup>1</sup>H NMR spectra for **31**

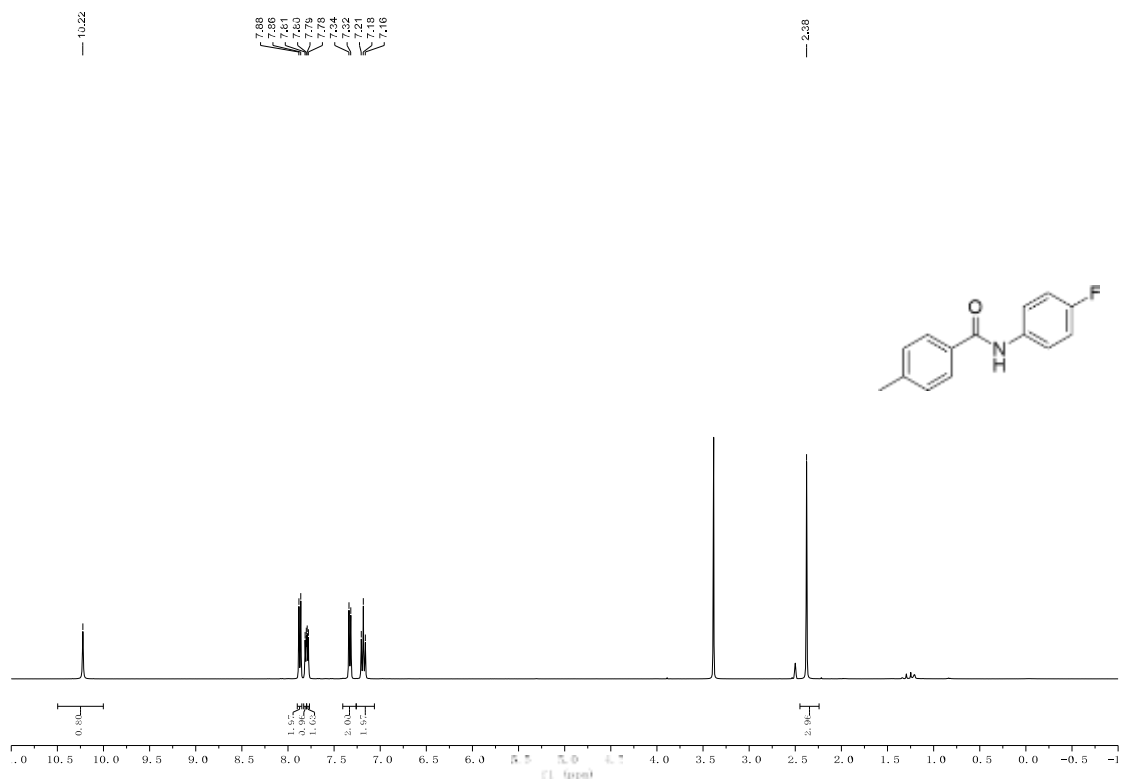

<sup>13</sup>C NMR spectra for **31**

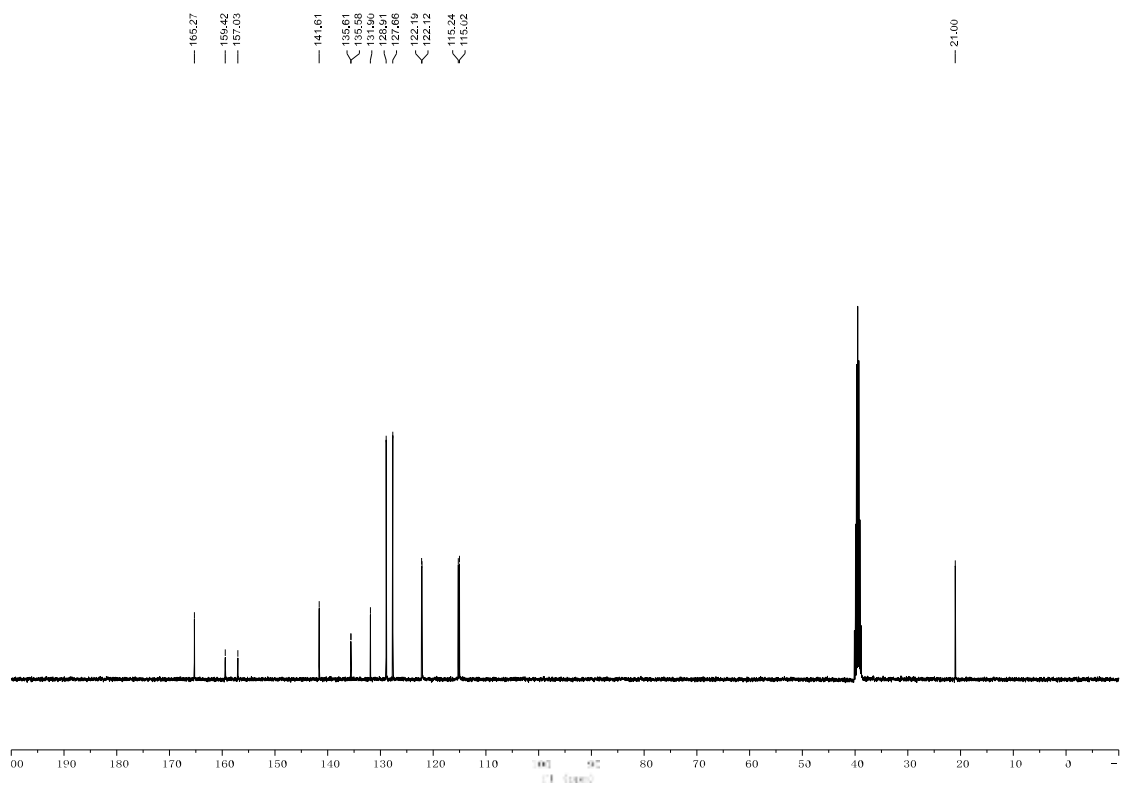

$^{19}\text{F}$  NMR spectra for **3l**

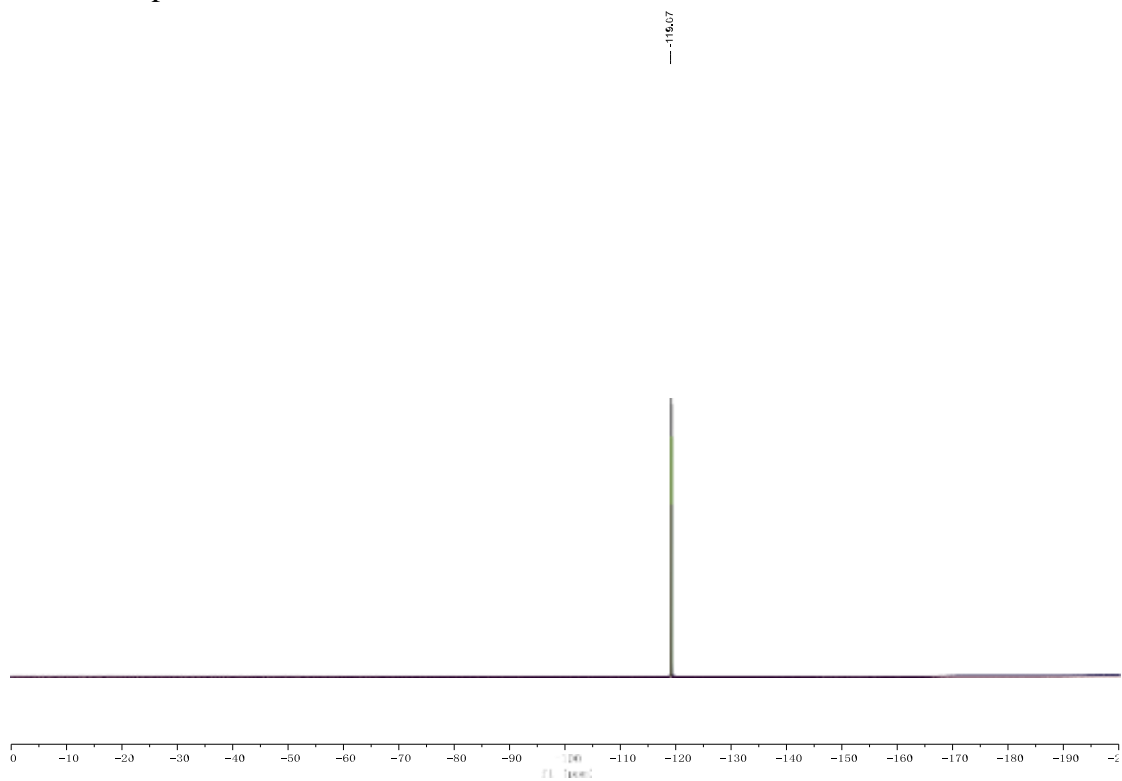

$^1\text{H}$  NMR spectra for **3m**

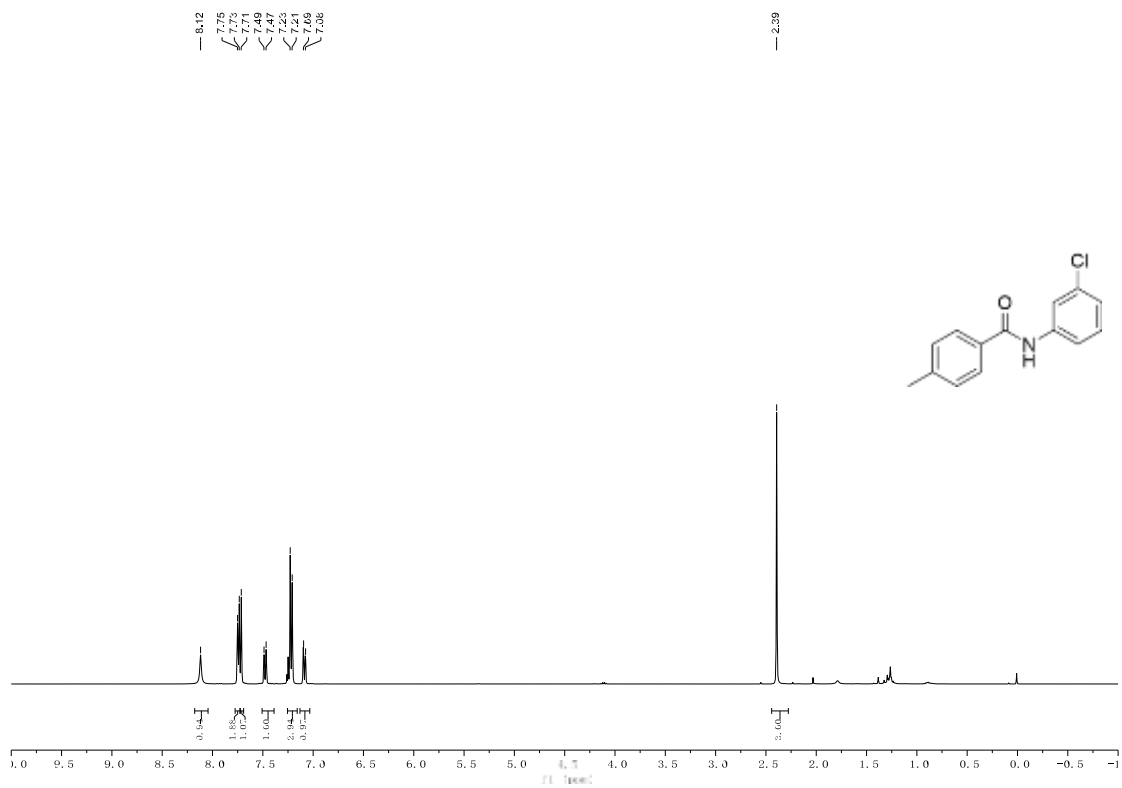

### <sup>13</sup>C NMR spectra for **3m**

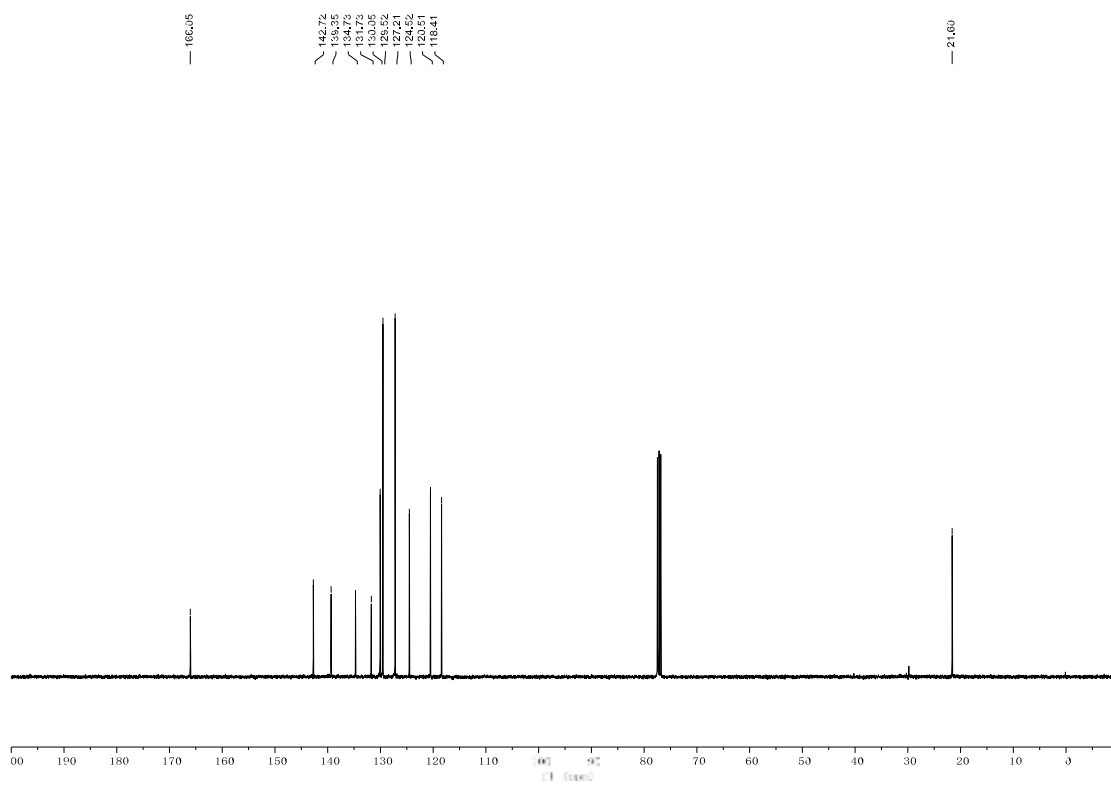

### <sup>1</sup>H NMR spectra for **3m**

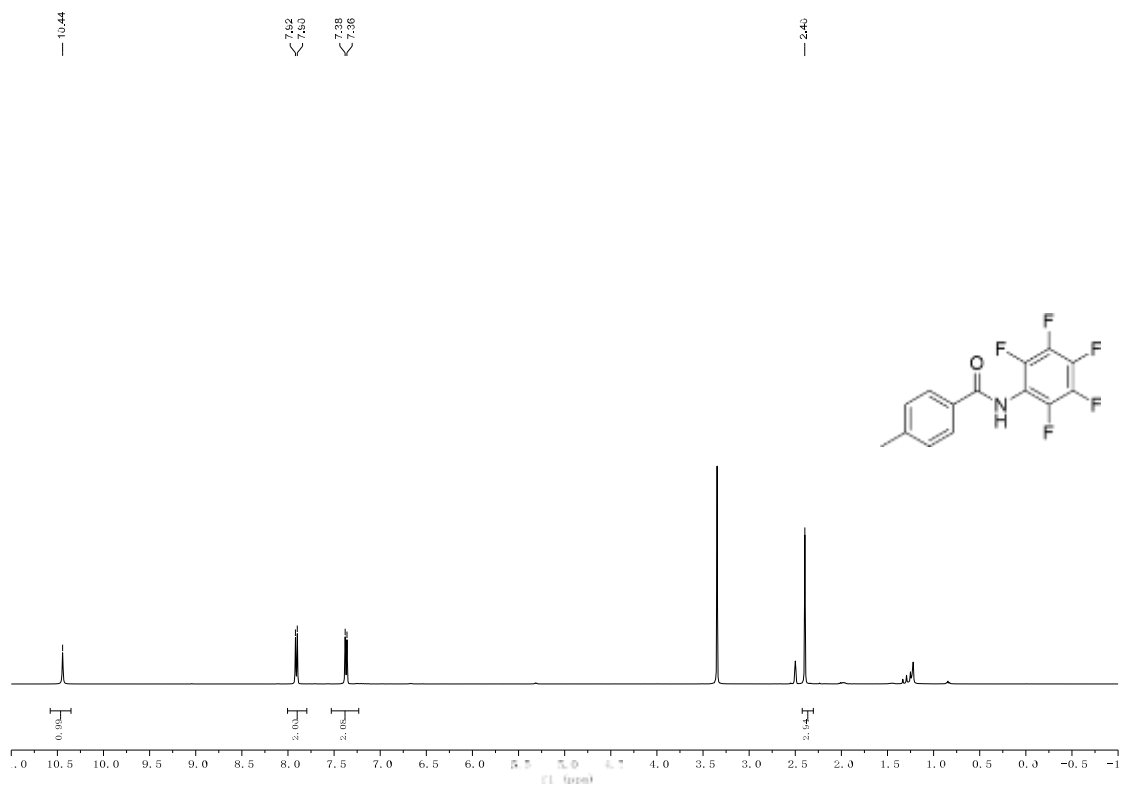

<sup>13</sup>C NMR spectra for **3n**

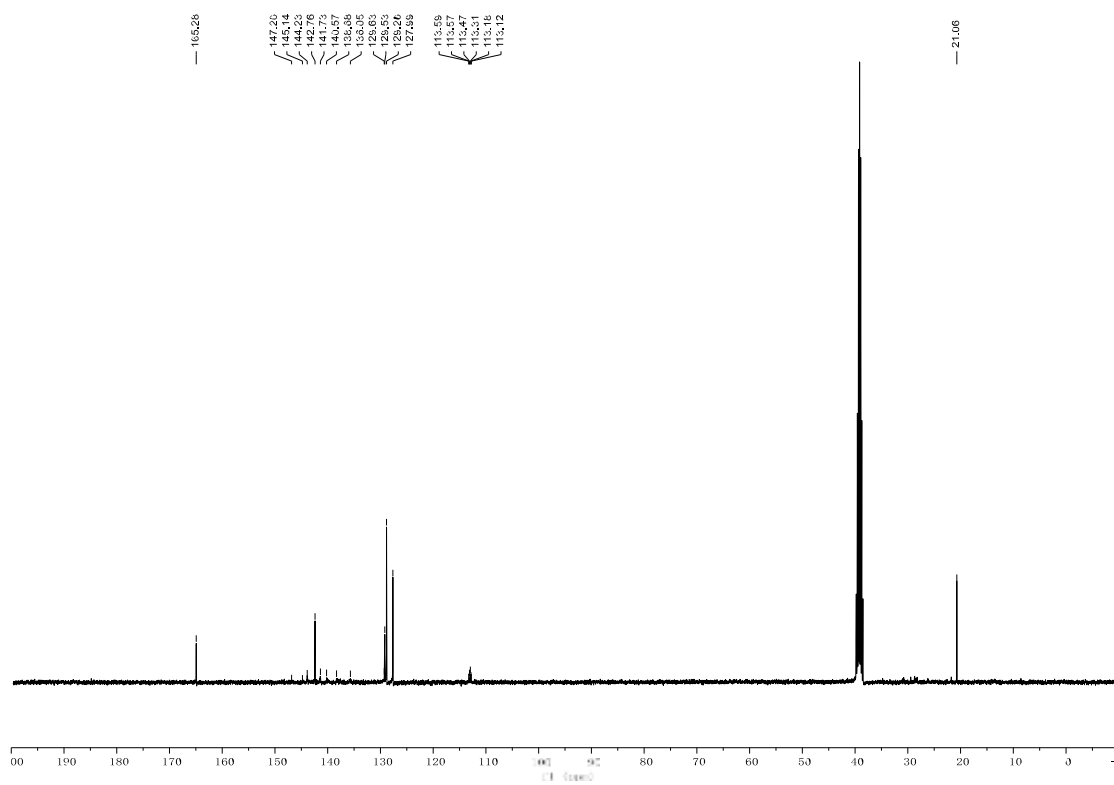

<sup>19</sup>F NMR spectra for **3n**

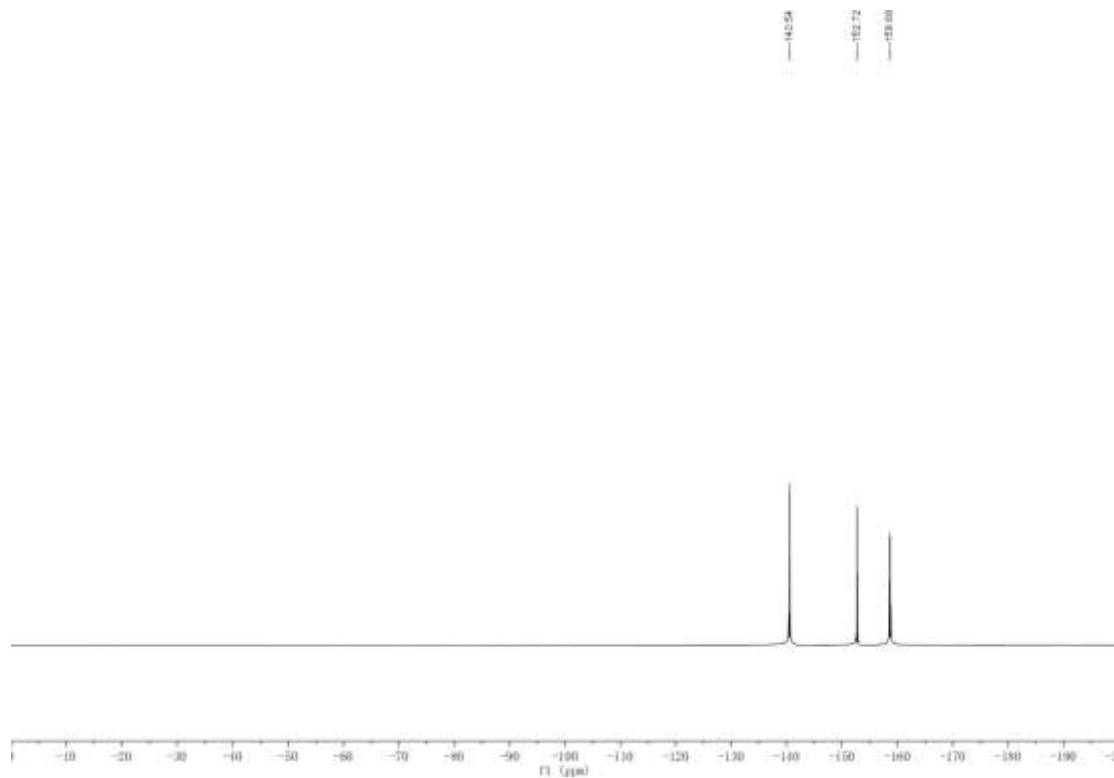

### $^1\text{H}$ NMR spectra for **30**

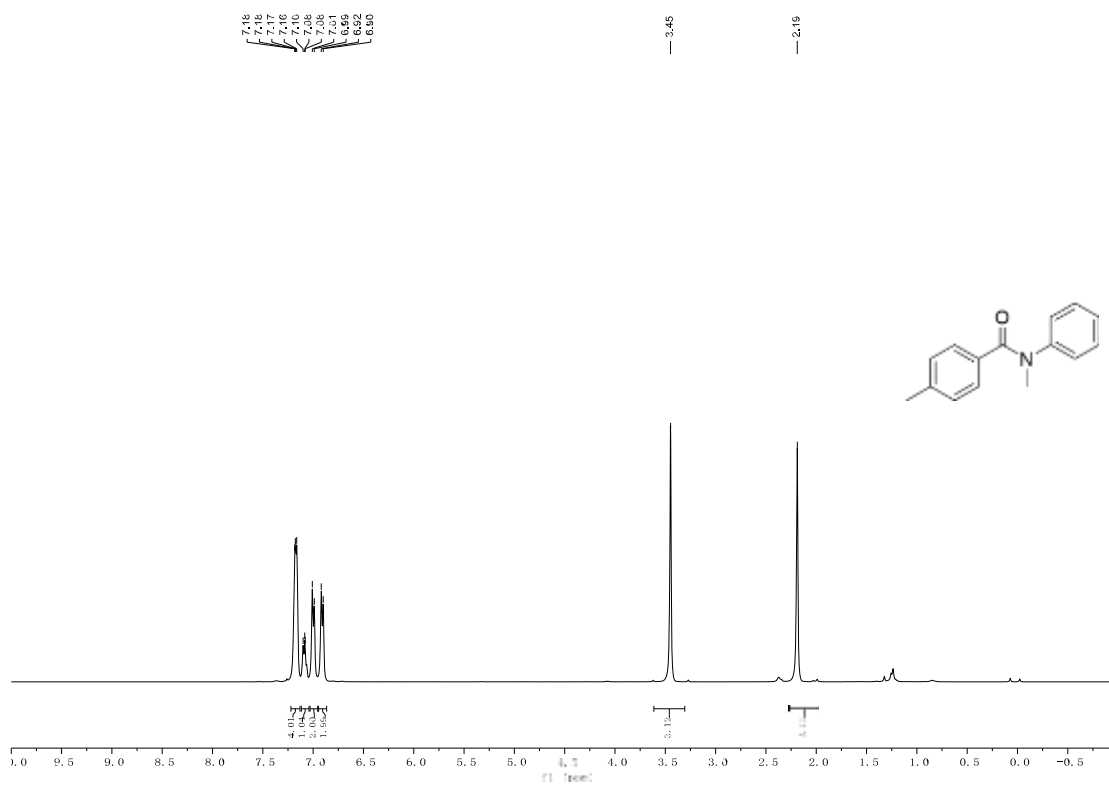

### $^{13}\text{C}$ NMR spectra for **30**

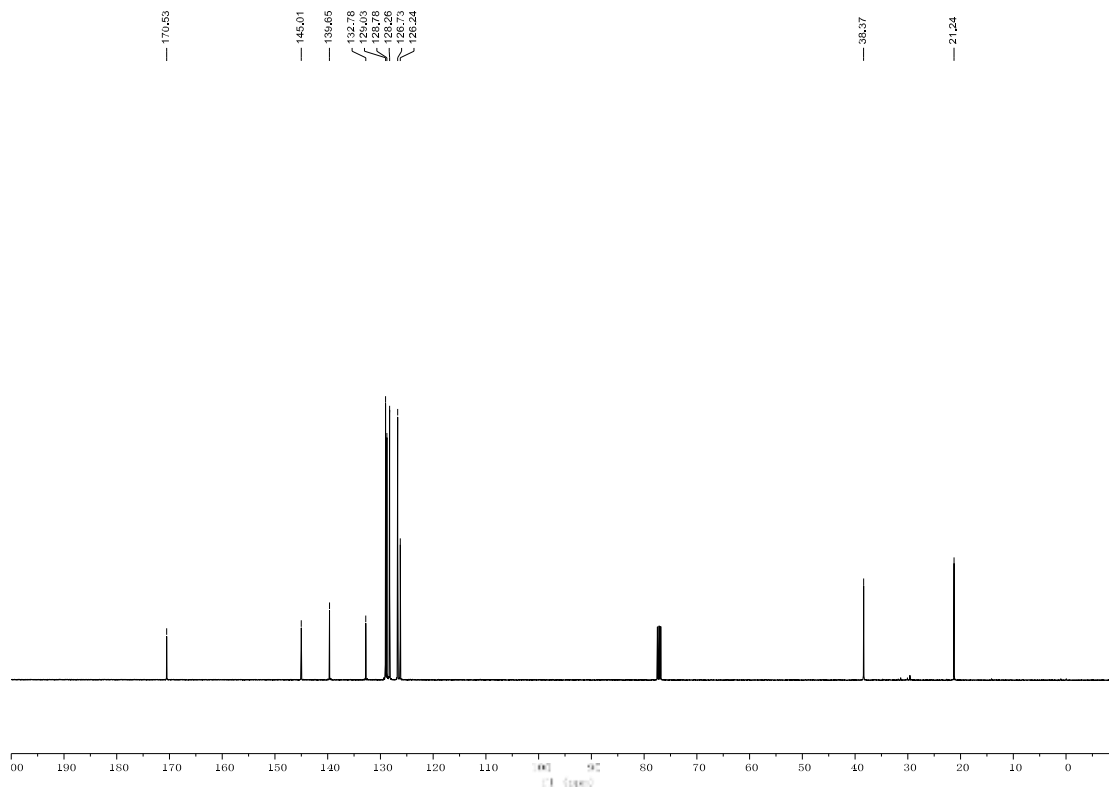

$^1\text{H}$  NMR spectra for **3p**

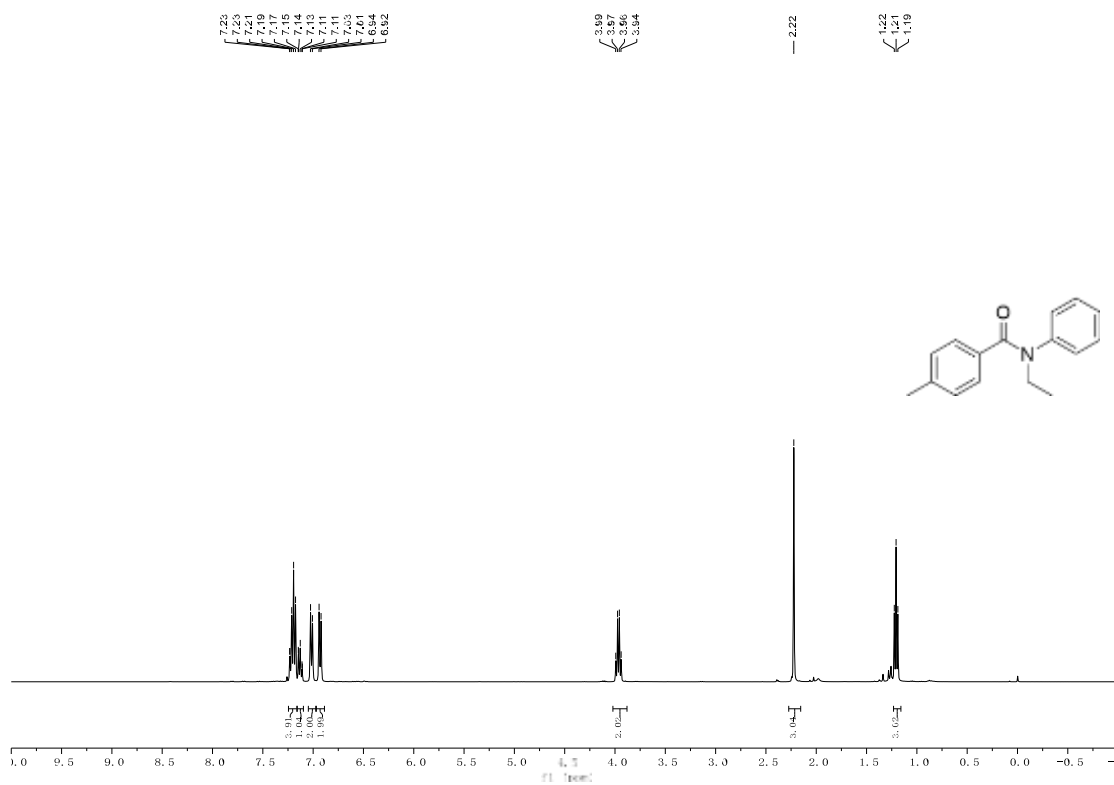

$^{13}\text{C}$  NMR spectra for **3p**

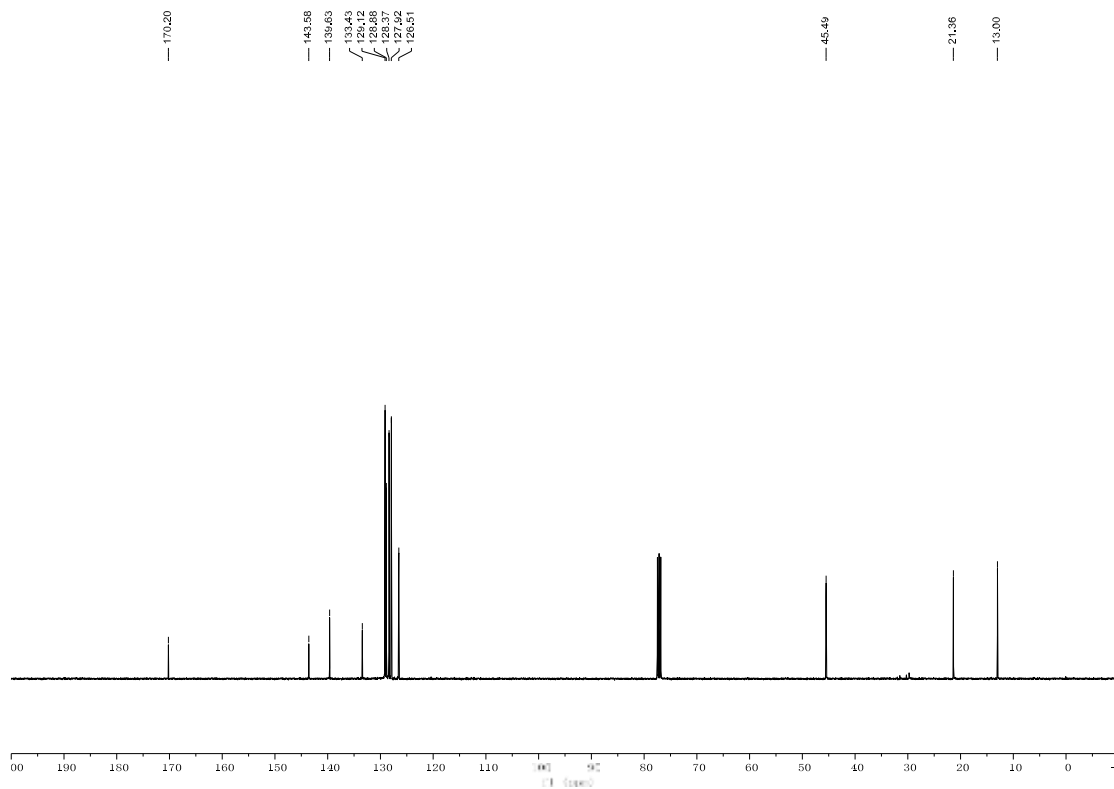



### $^1\text{H}$ NMR spectra for **3q**

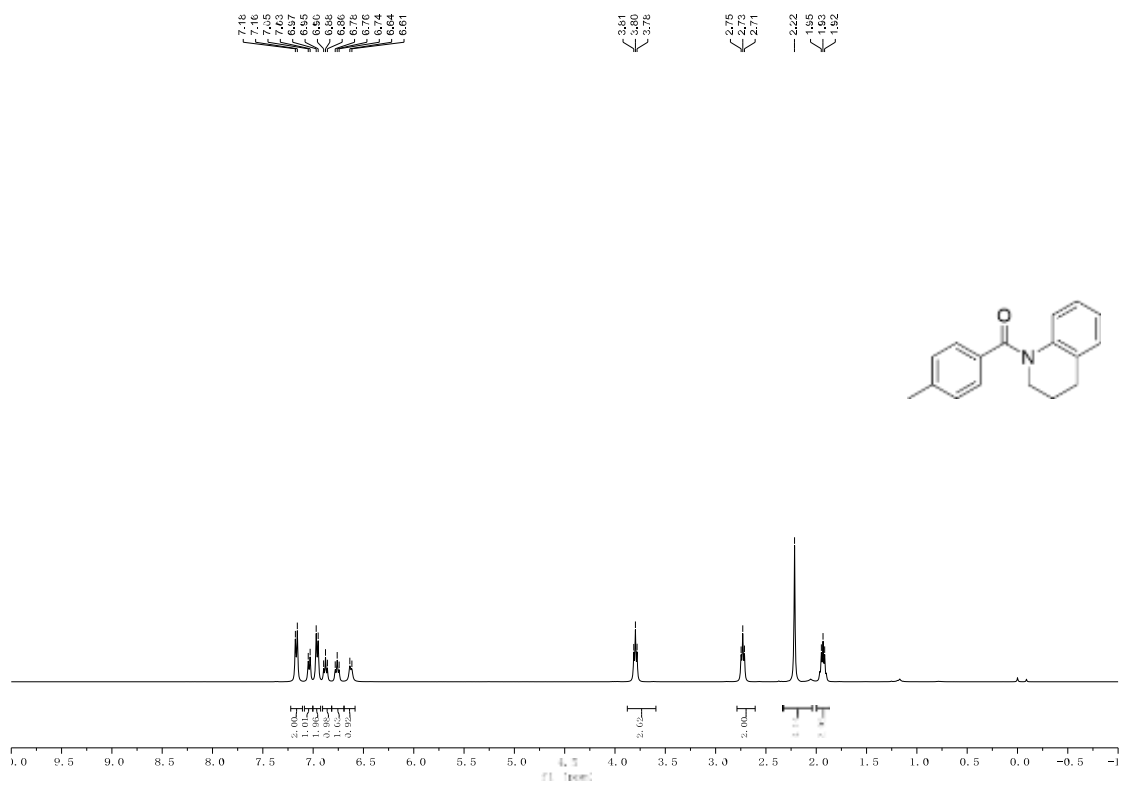

### $^{13}\text{C}$ NMR spectra for **3q**

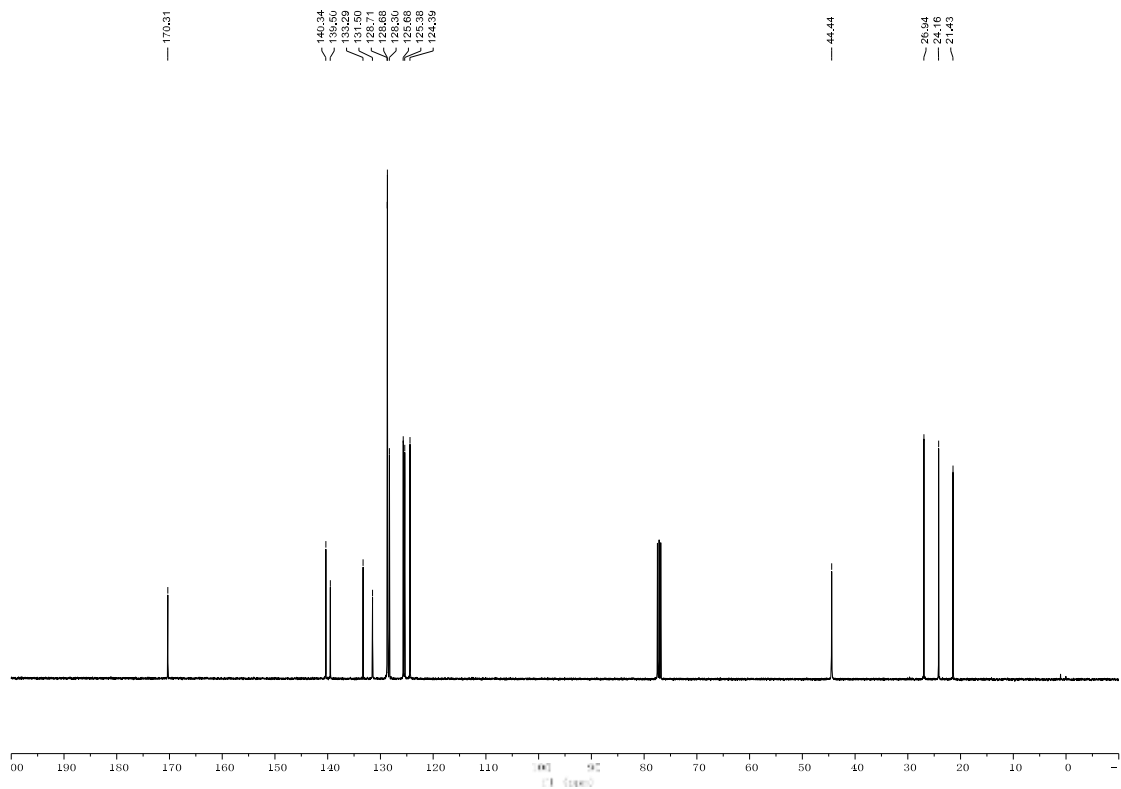

$^1\text{H}$  NMR spectra for **3r**

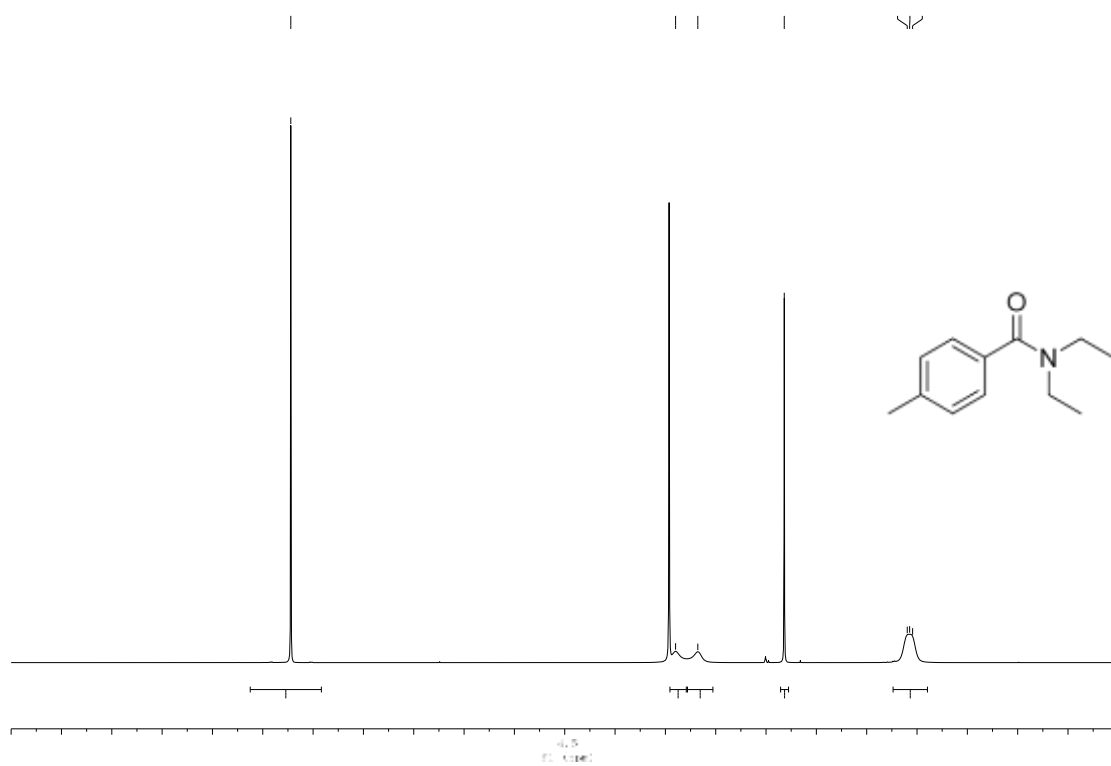

$^{13}\text{C}$  NMR spectra for **3r**

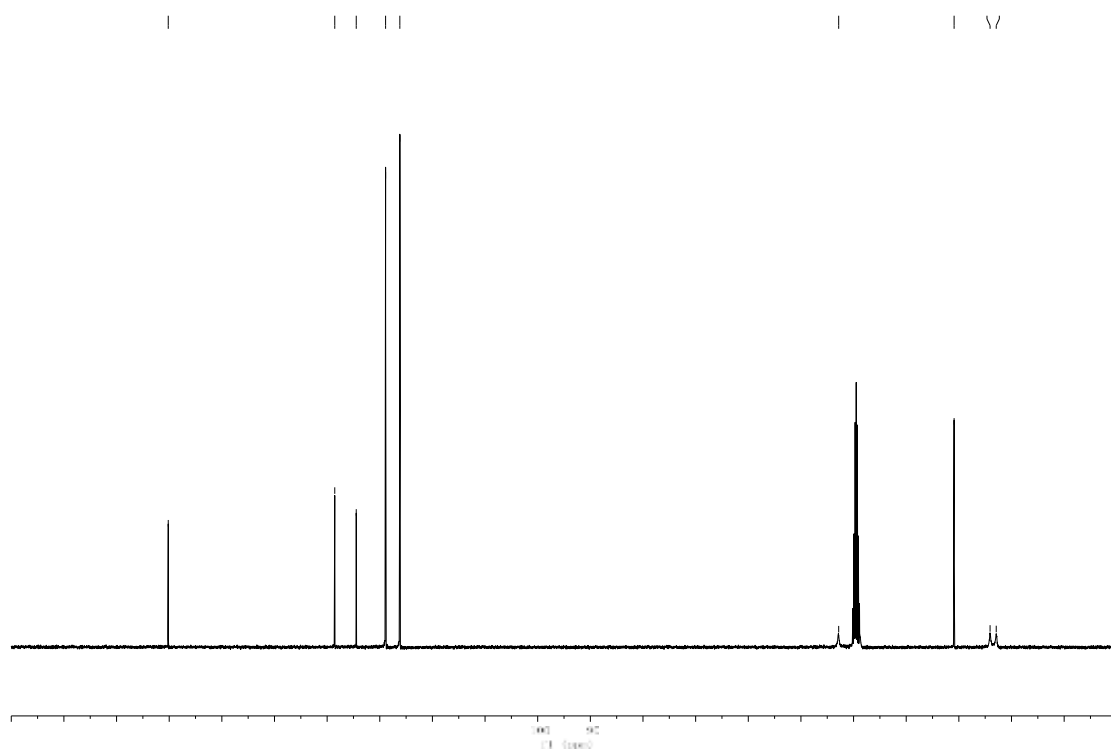

$^1\text{H}$  NMR spectra for **3s**

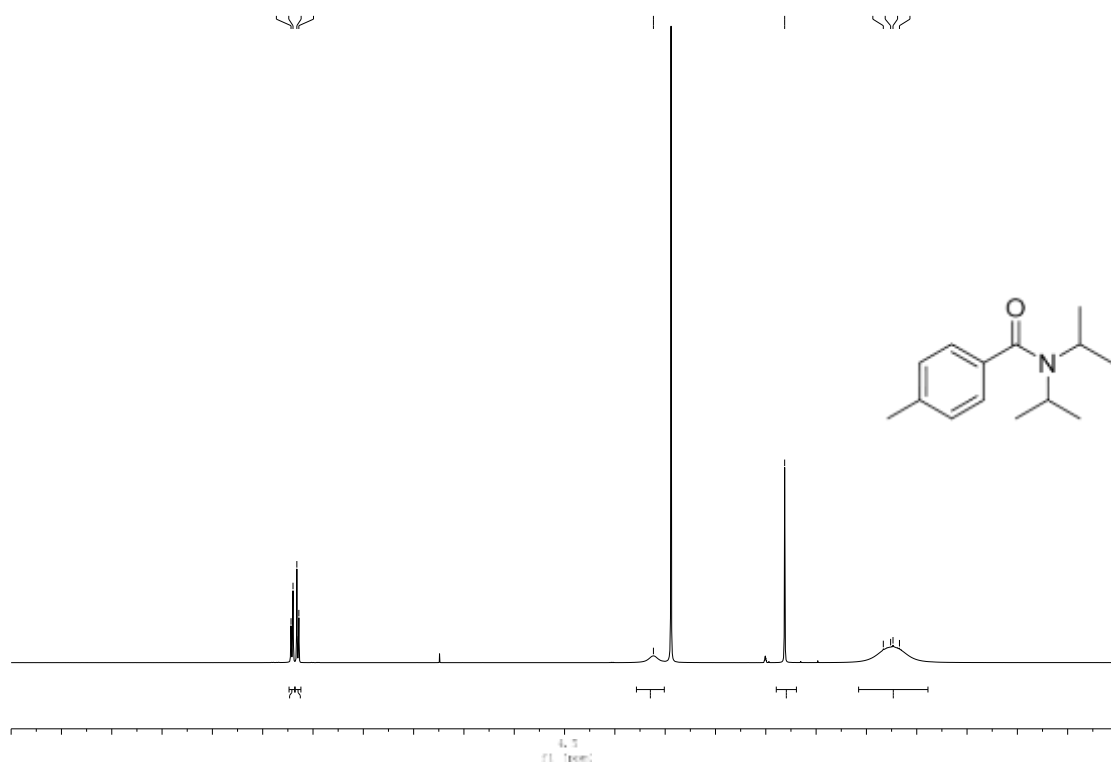

$^{13}\text{C}$  NMR spectra for **3s**

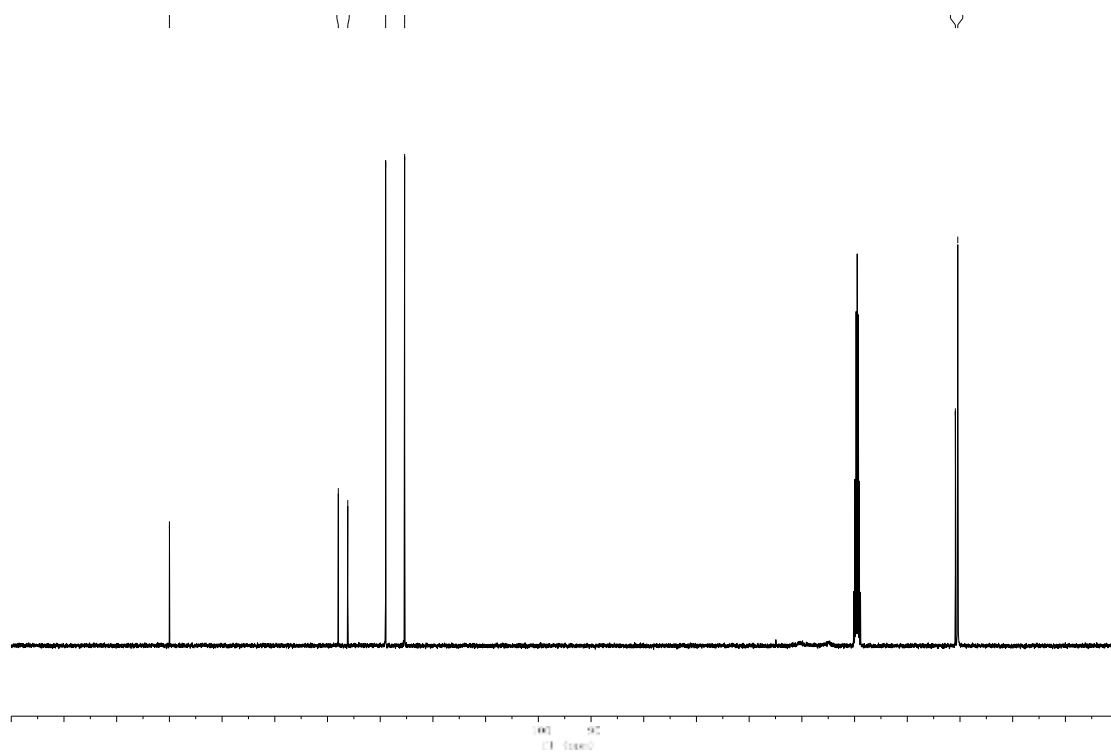

$^1\text{H}$  NMR spectra for **3t**

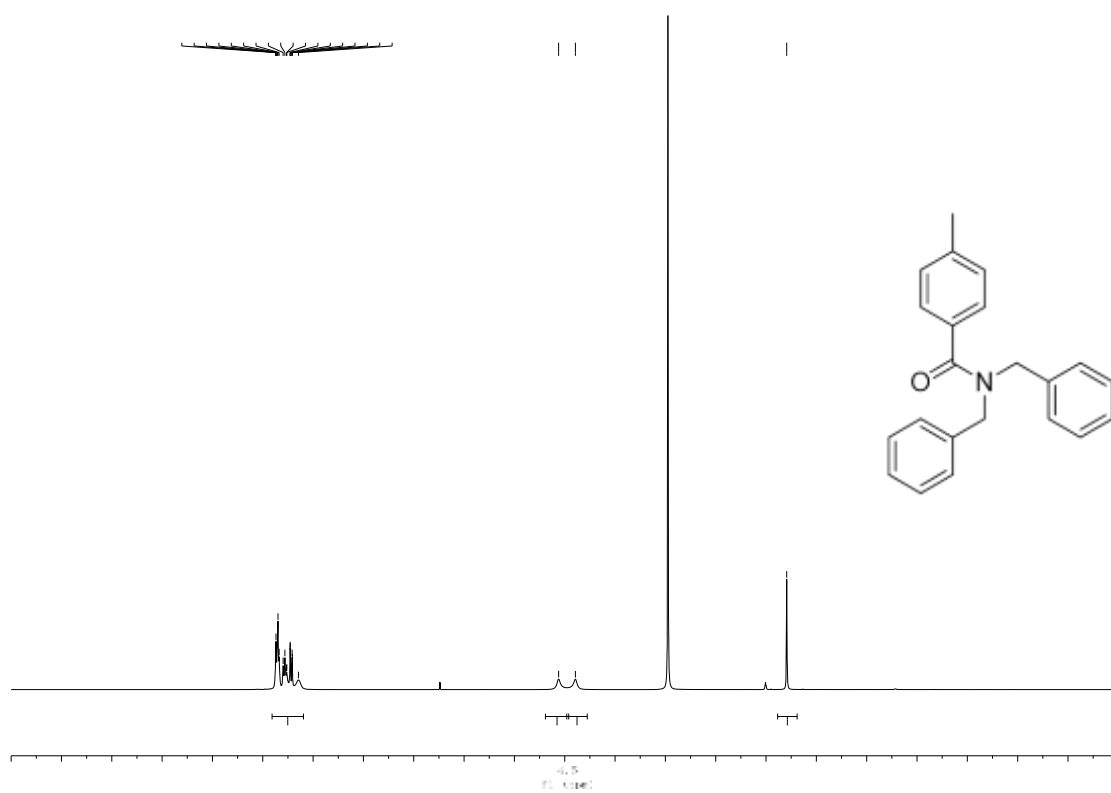

$^{13}\text{C}$  NMR spectra for **3t**

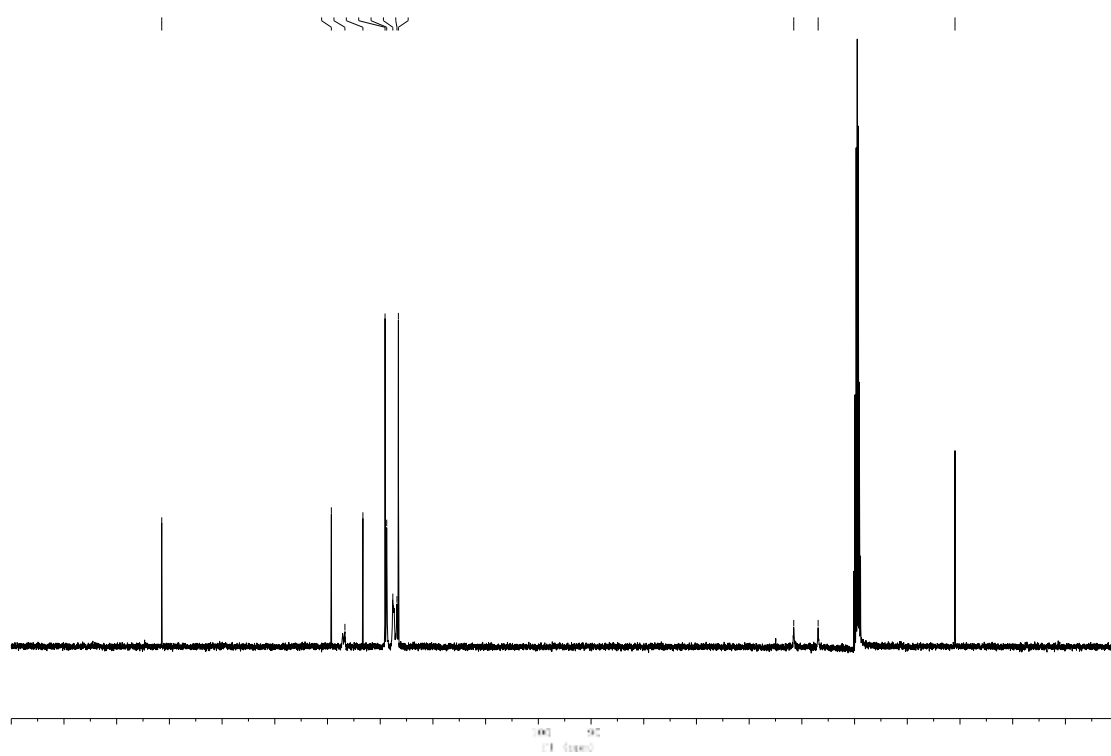



### $^1\text{H}$ NMR spectra for **3v**

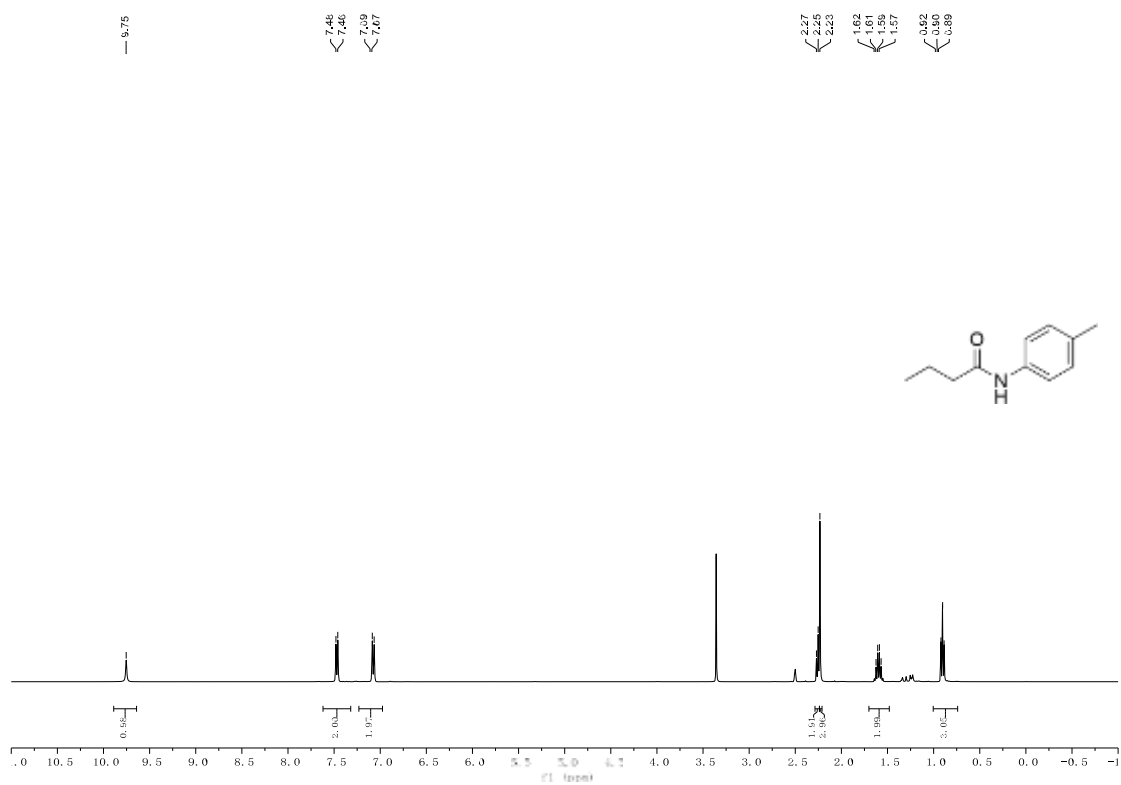

### $^{13}\text{C}$ NMR spectra for **3v**

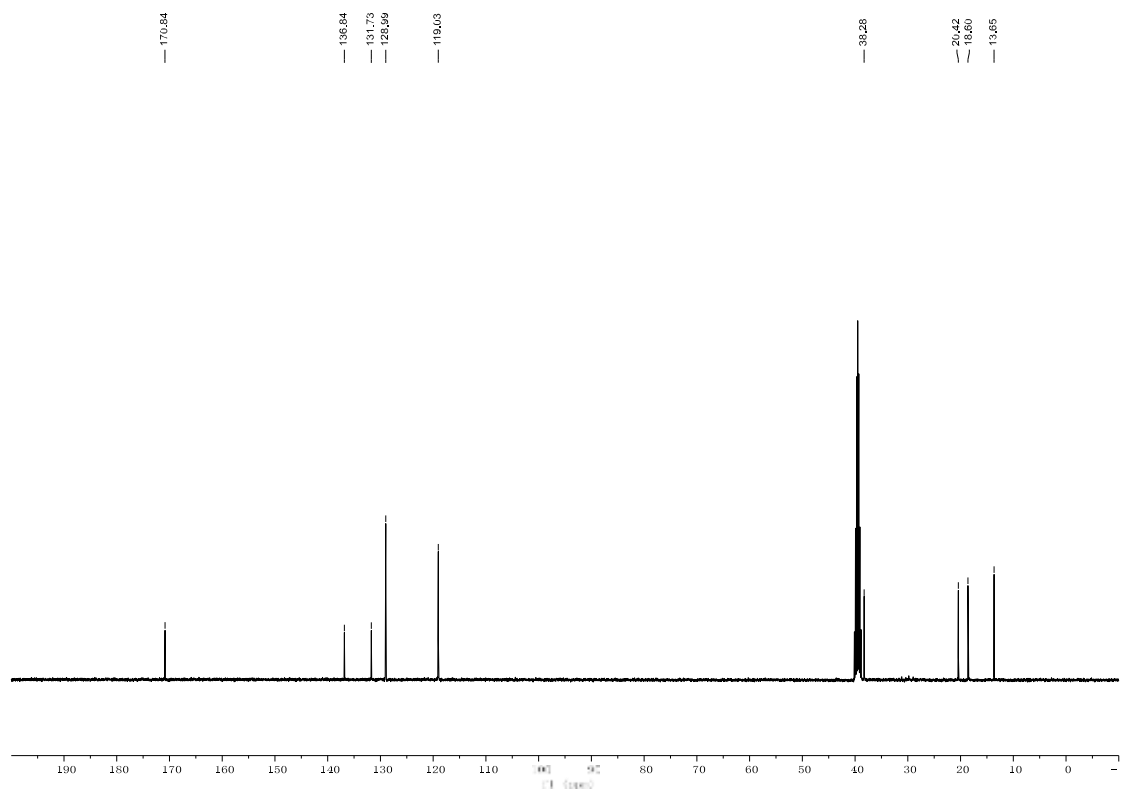

$^1\text{H}$  NMR spectra for **3w**

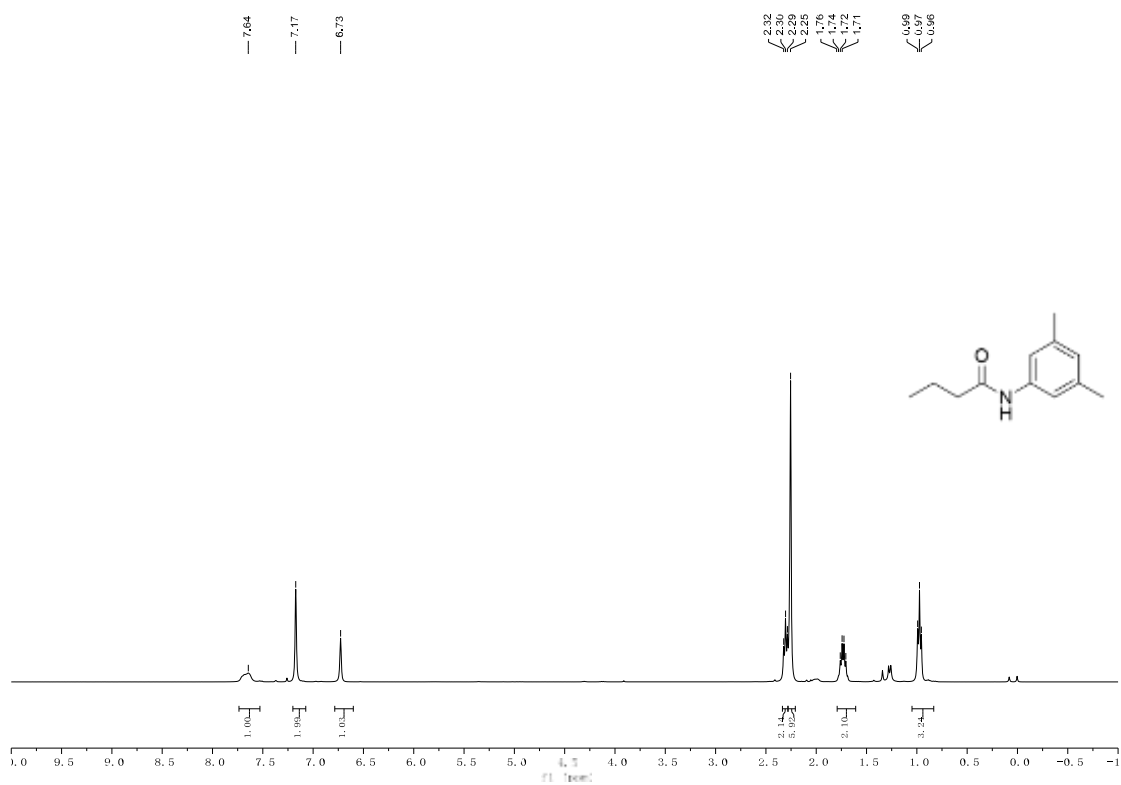

$^{13}\text{C}$  NMR spectra for **3w**

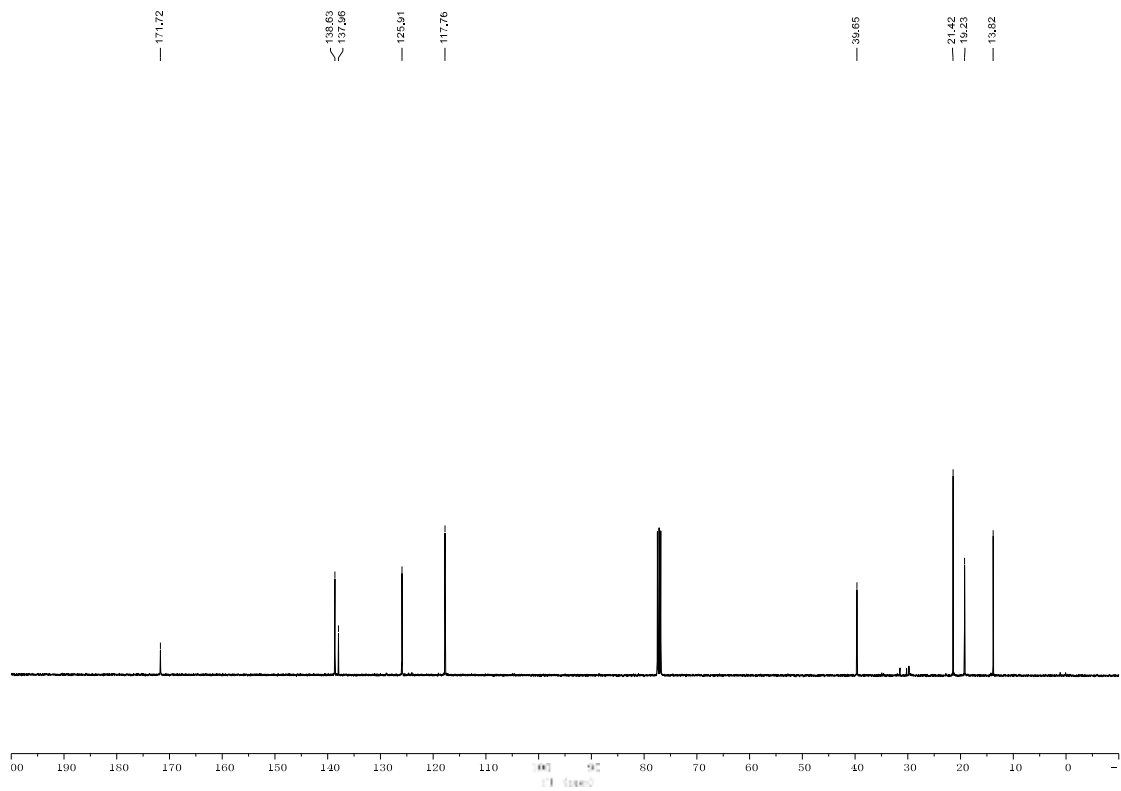

### $^1\text{H}$ NMR spectra for **3x**

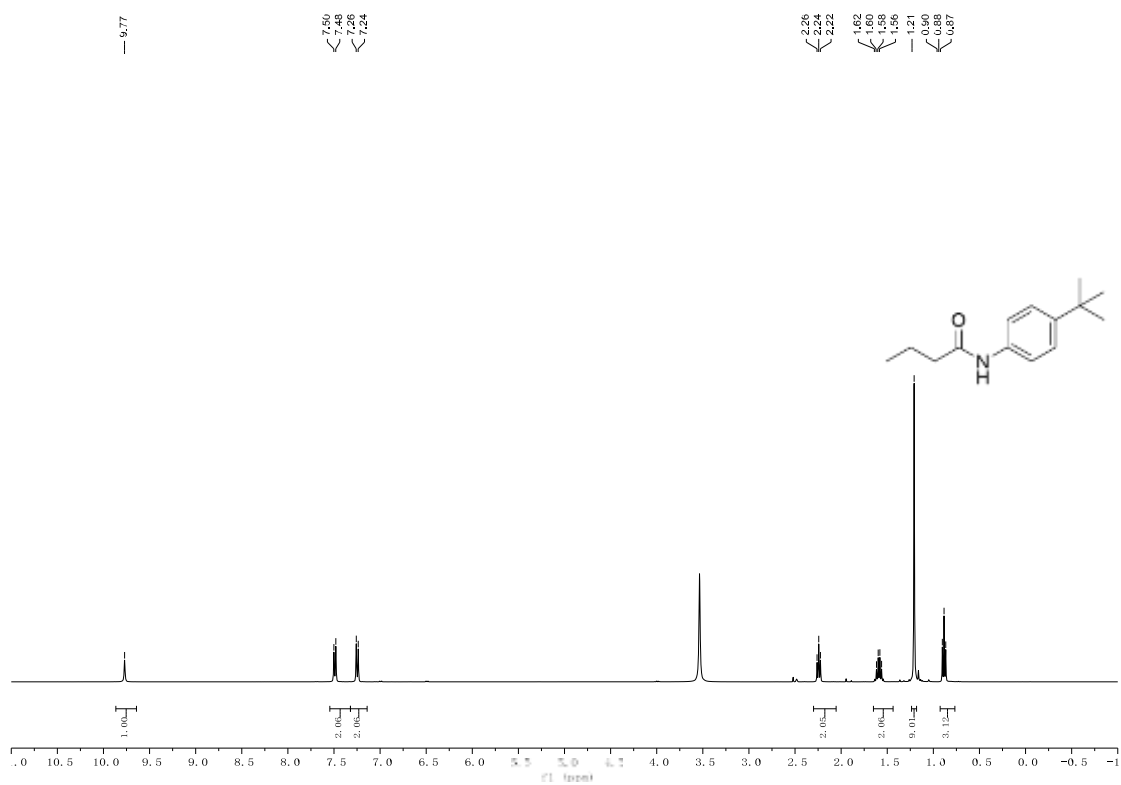

### $^{13}\text{C}$ NMR spectra for **3x**

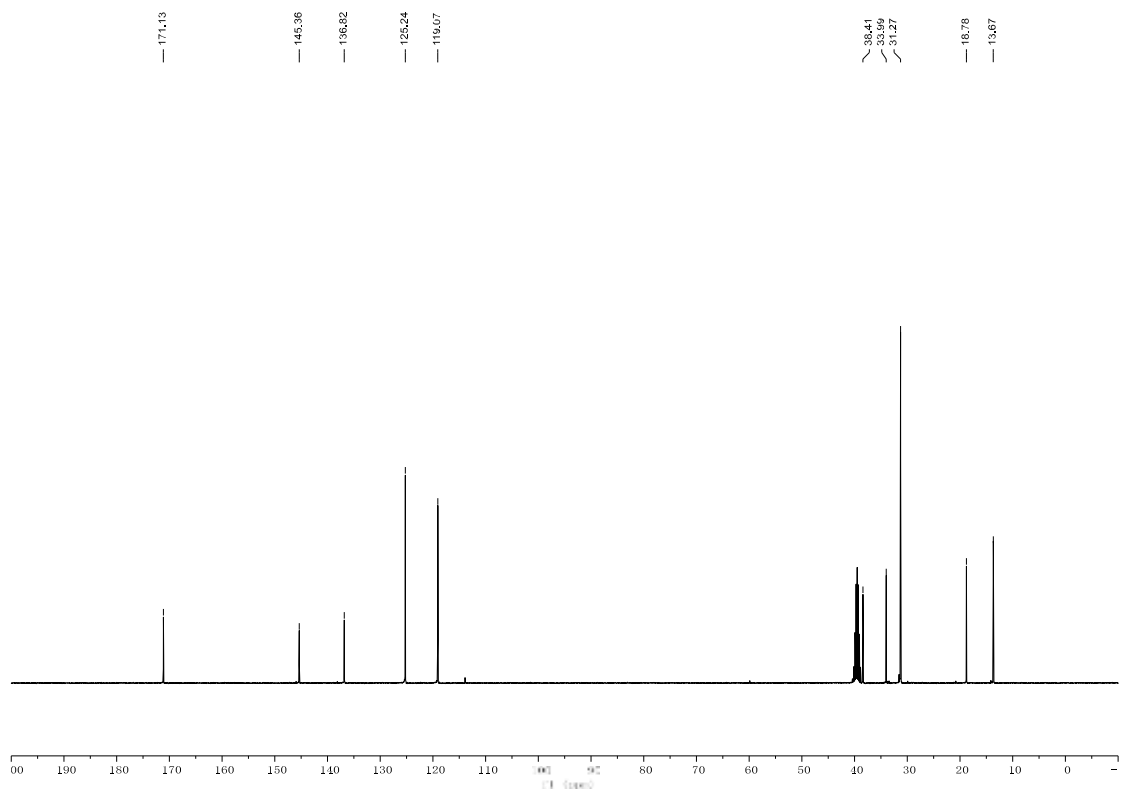



### $^1\text{H}$ NMR spectra for **3y**

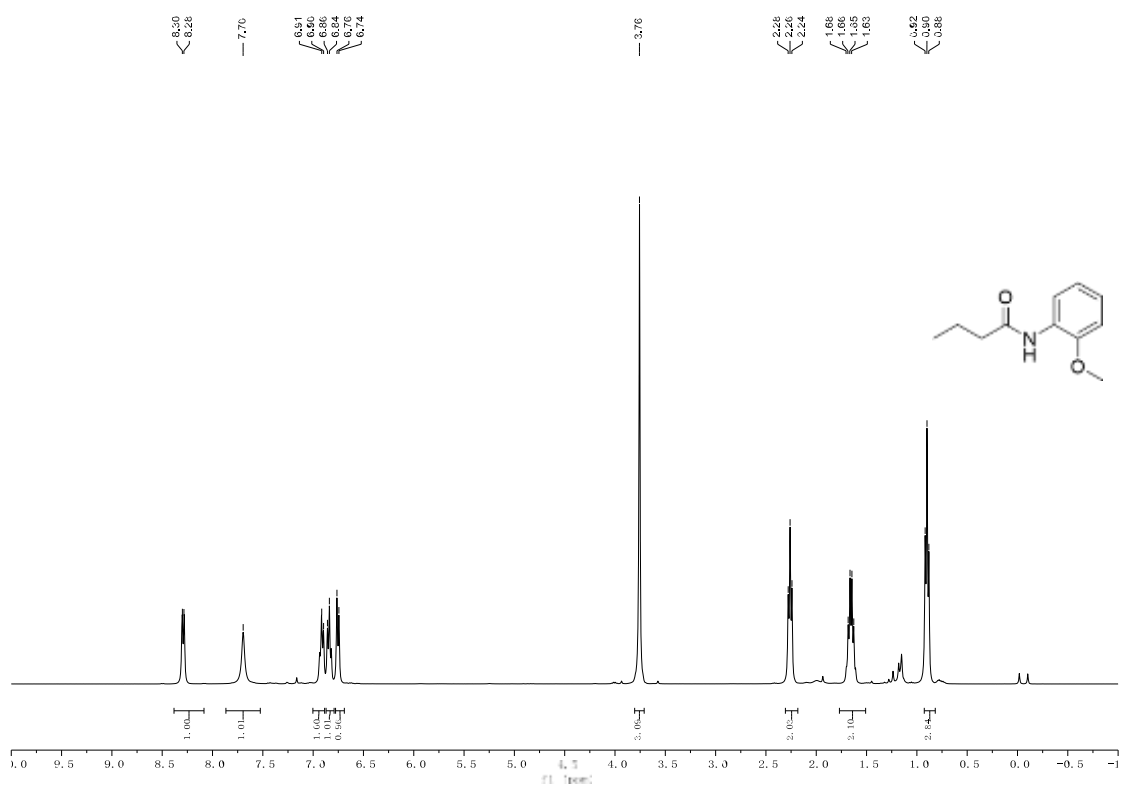

### $^{13}\text{C}$ NMR spectra for **3y**

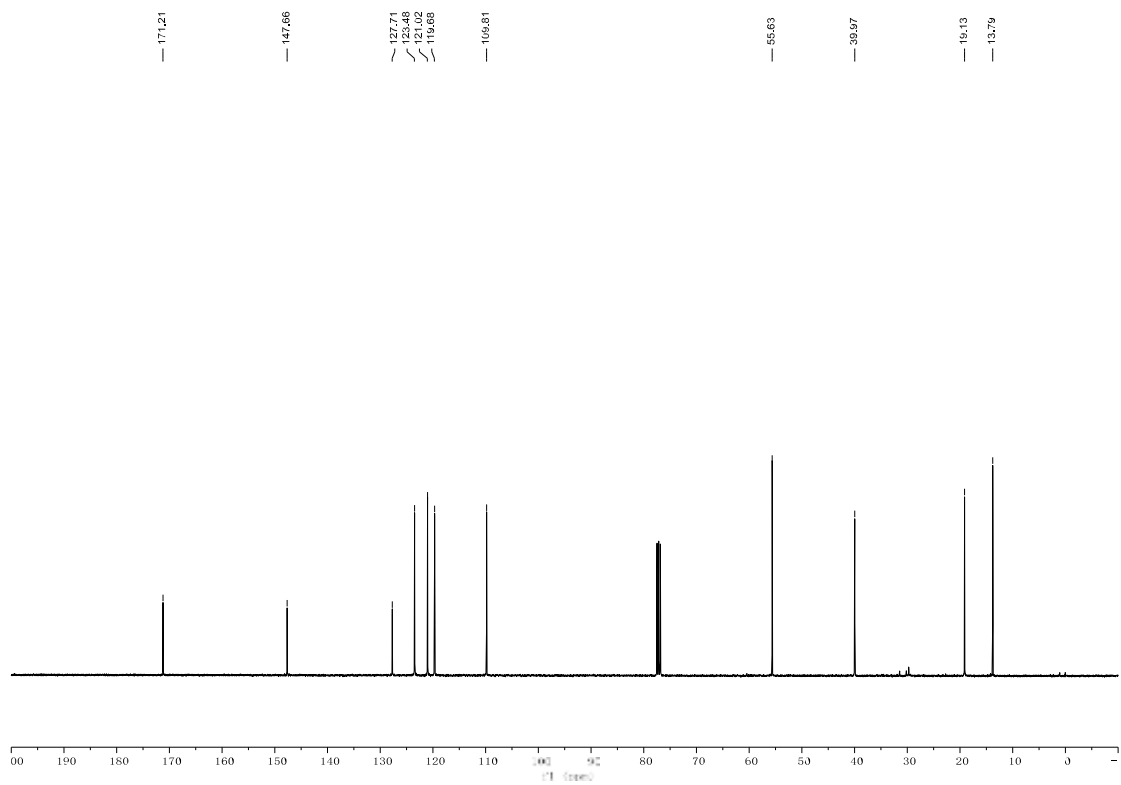

$^1\text{H}$  NMR spectra for **3z**

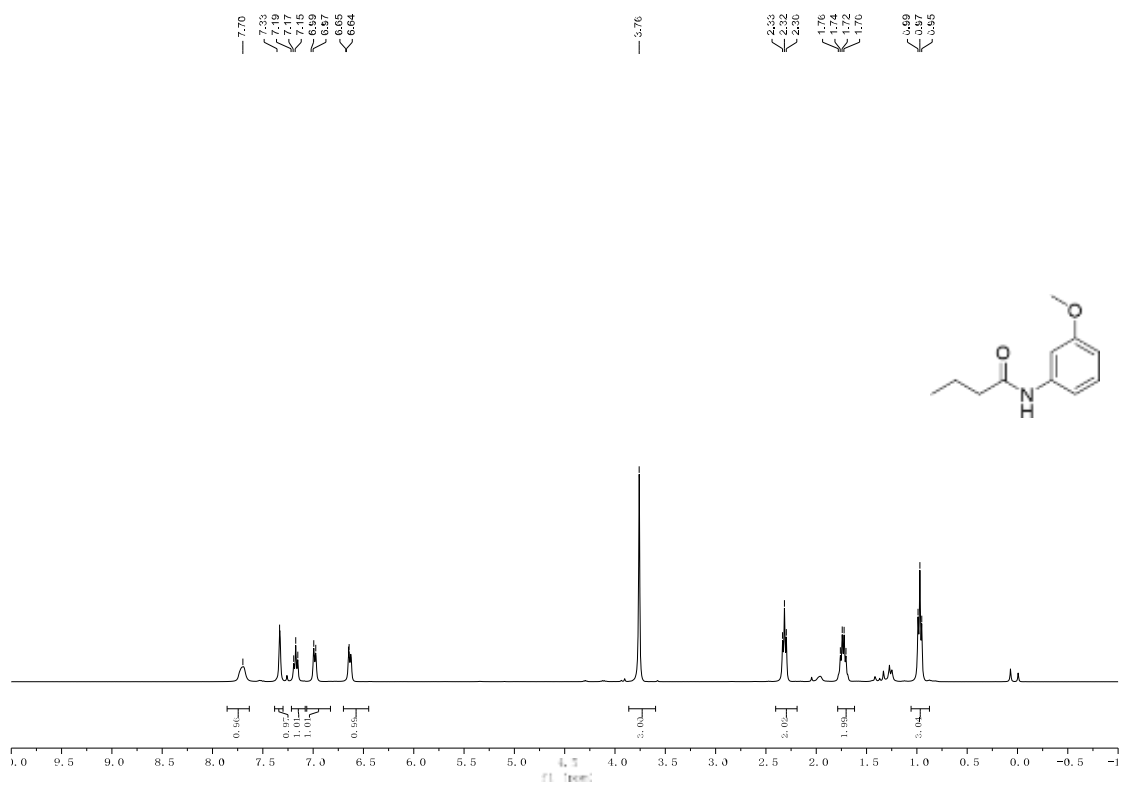

$^{13}\text{C}$  NMR spectra for **3z**

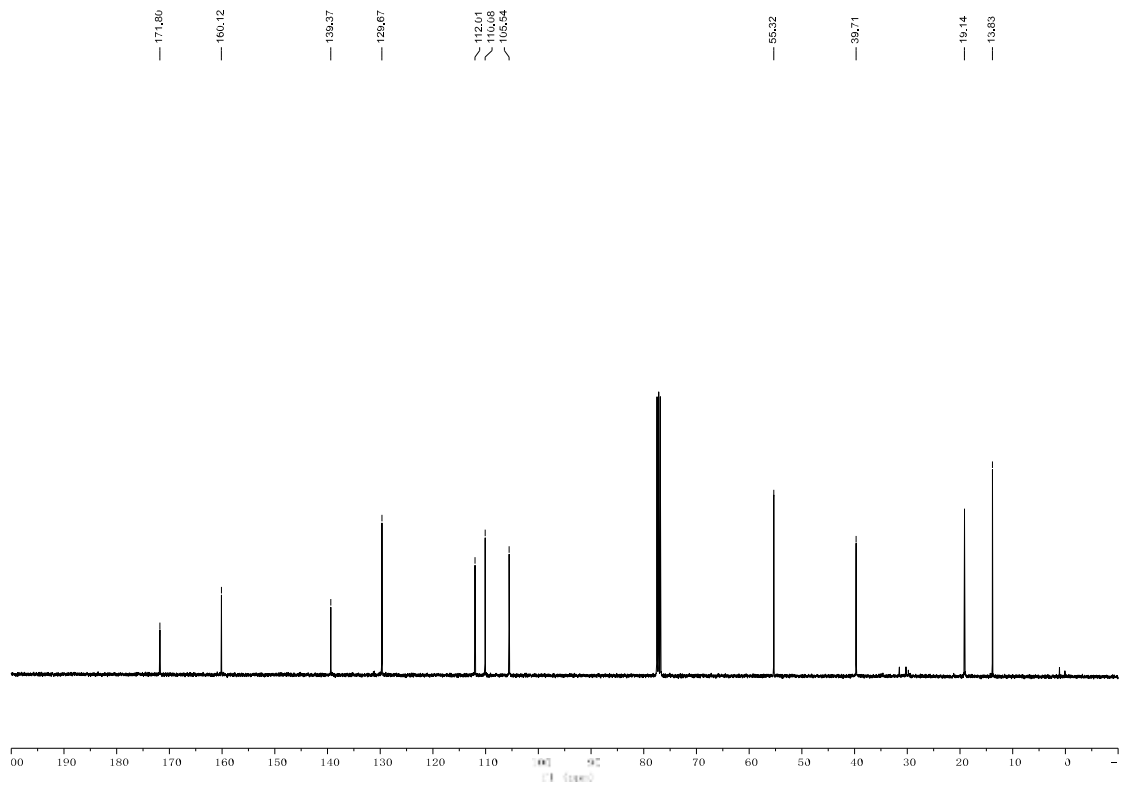

# <sup>1</sup>H NMR spectra for **3aa**

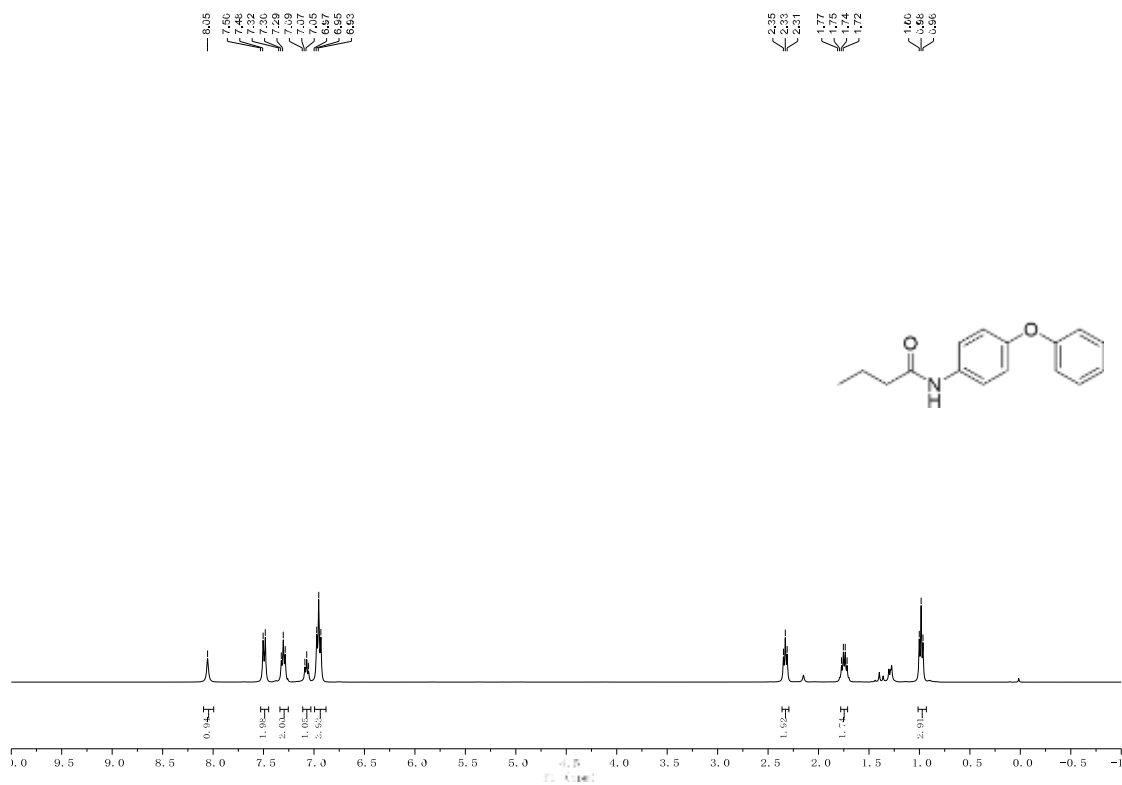

# <sup>13</sup>C NMR spectra for **3aa**

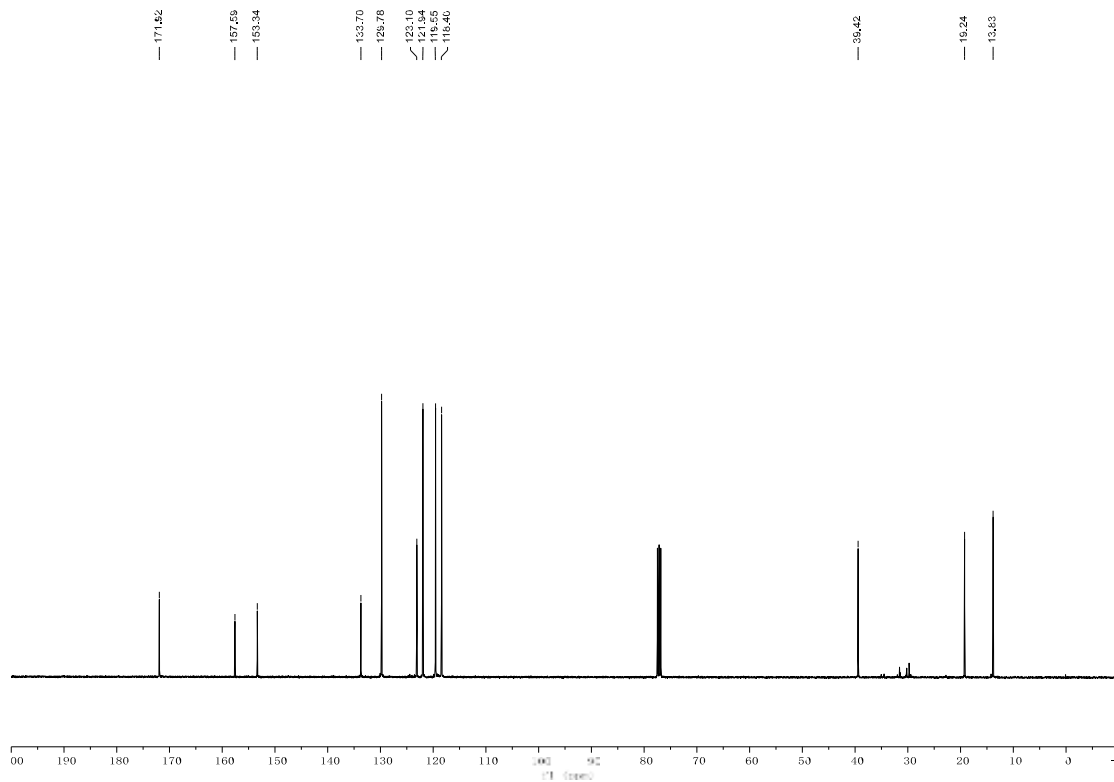

<sup>1</sup>H NMR spectra for **3ab**

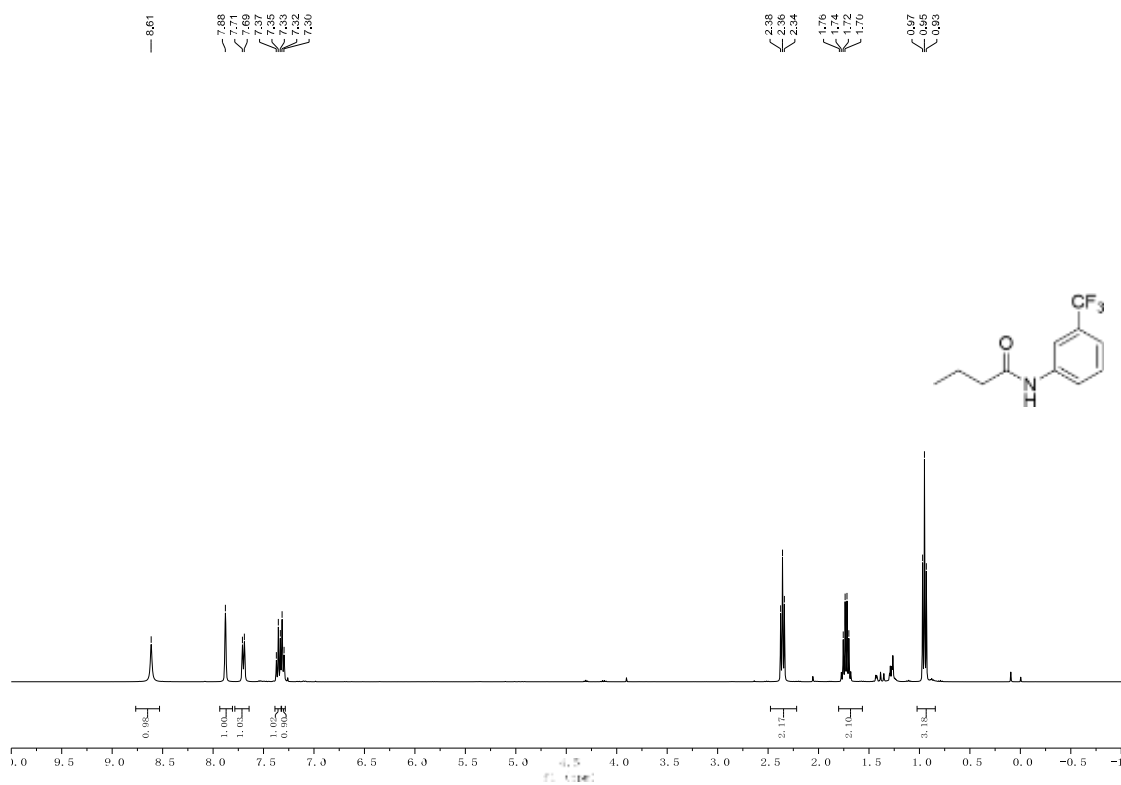

<sup>13</sup>C NMR spectra for **3ab**

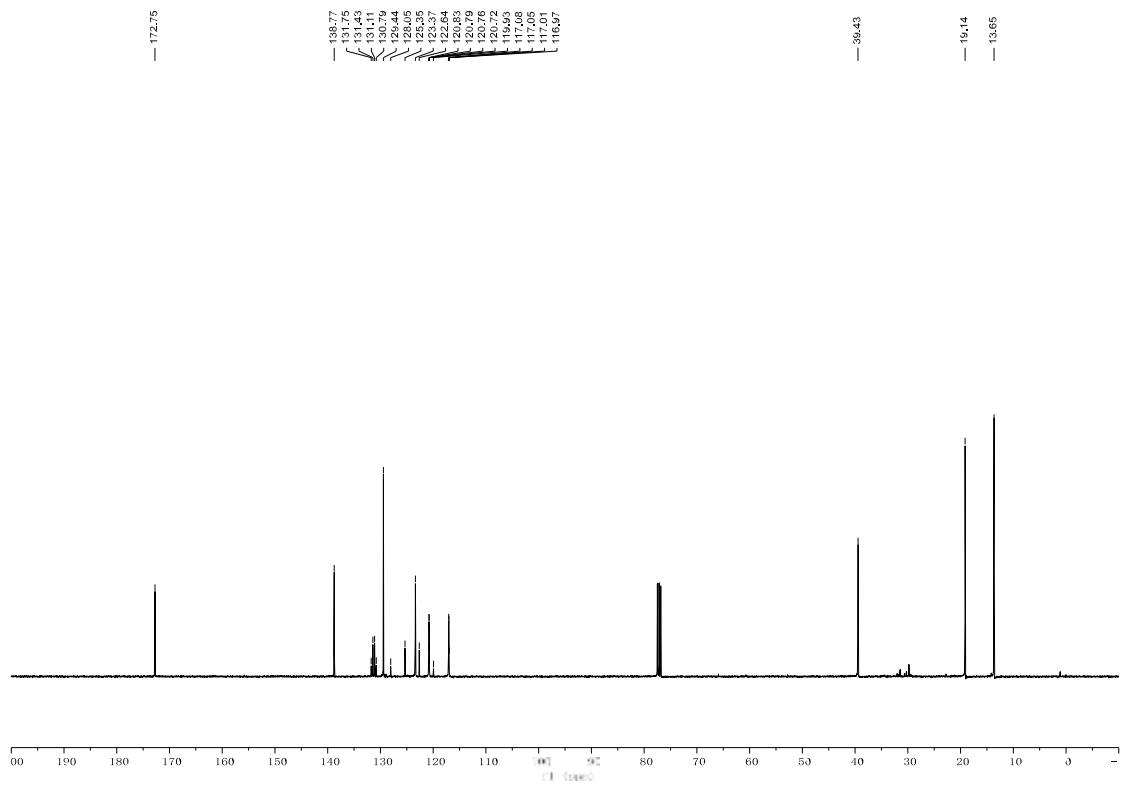

<sup>19</sup>F NMR spectra for **3ab**

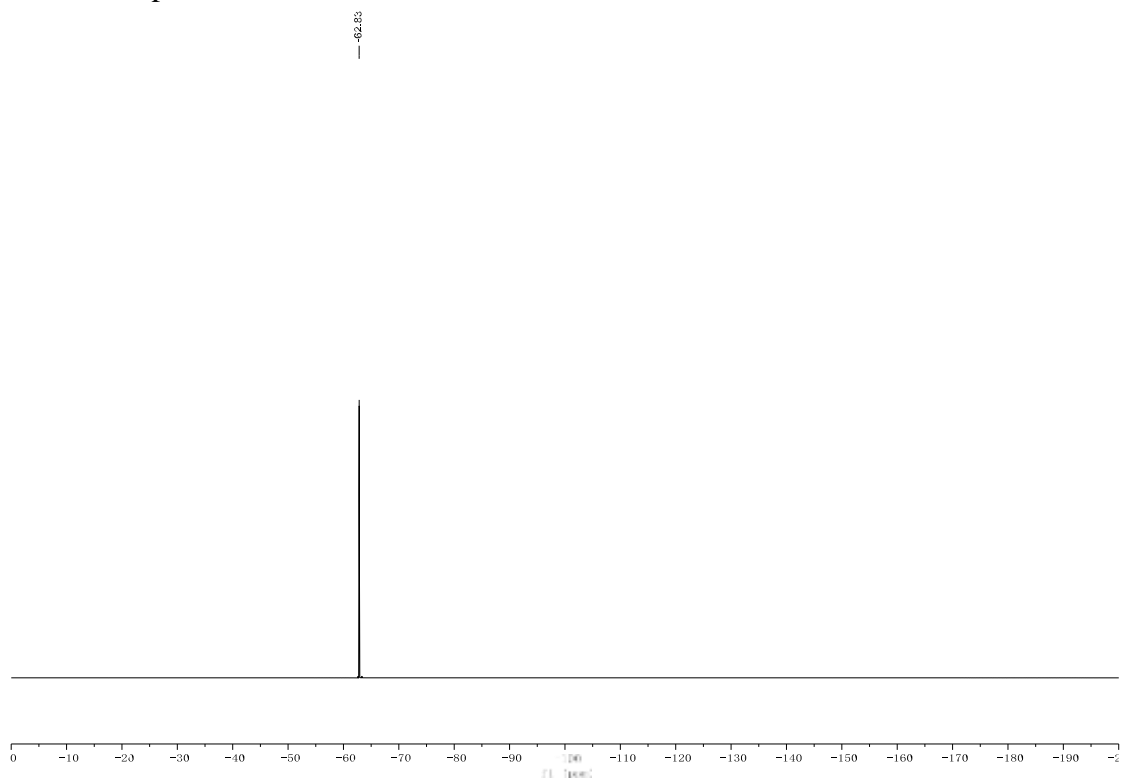

<sup>1</sup>H NMR spectra for **3ac**

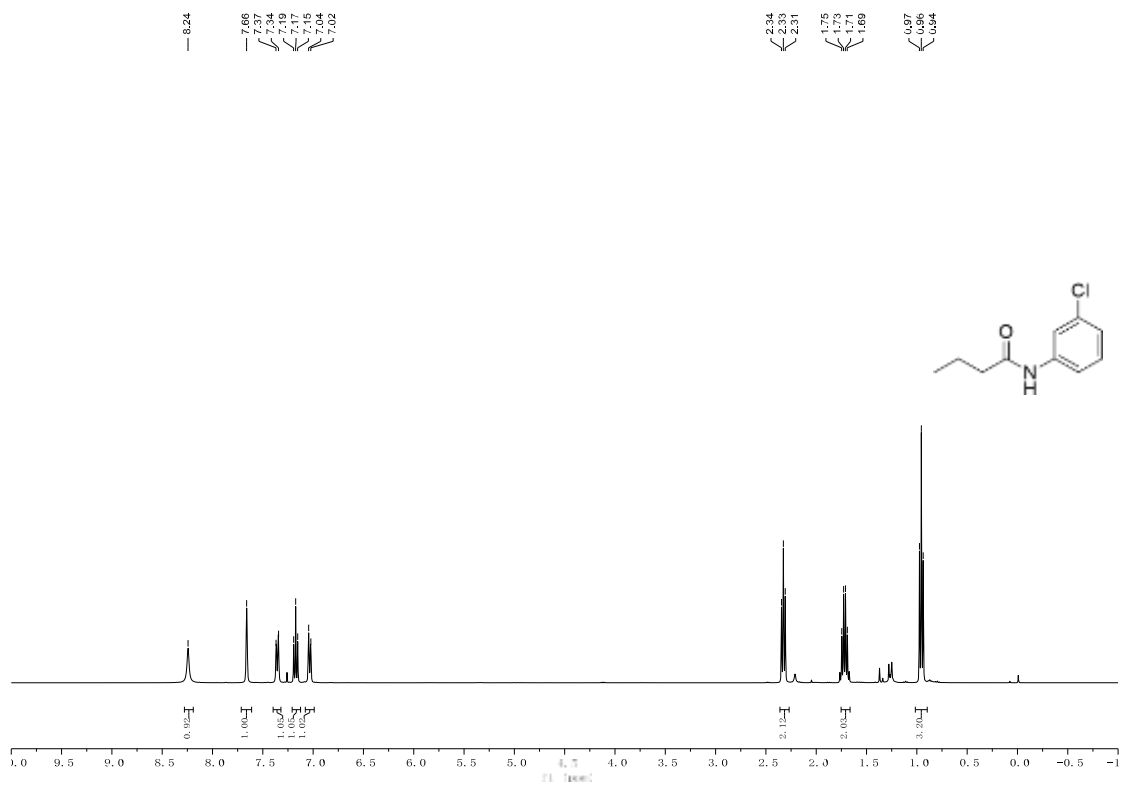

### $^{13}\text{C}$ NMR spectra for **3ac**

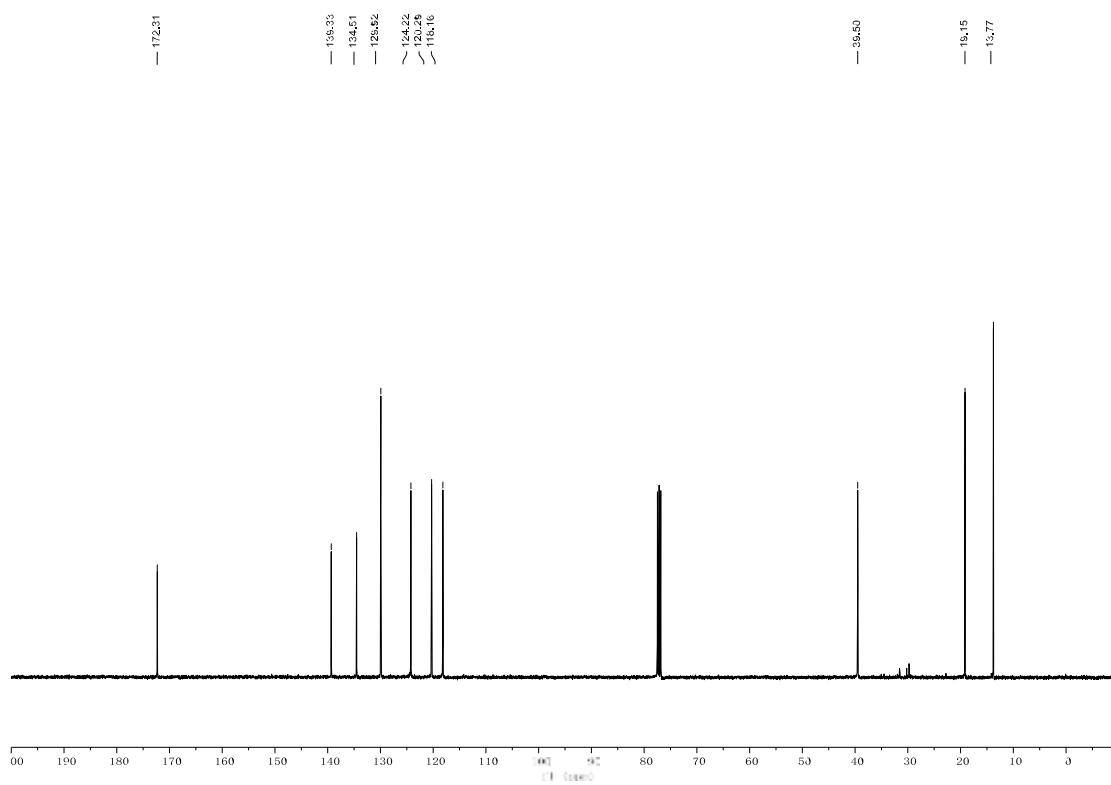

### $^1\text{H}$ NMR spectra for **3ad**

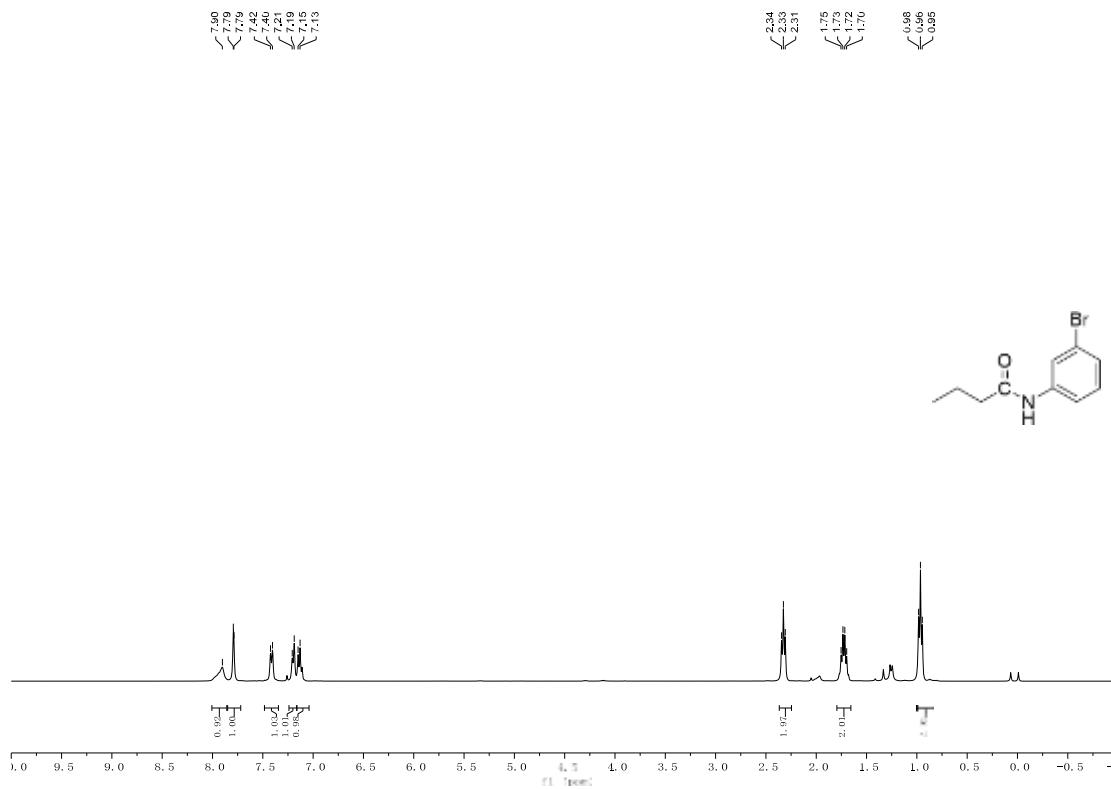



<sup>13</sup>C NMR spectra for **3ae**

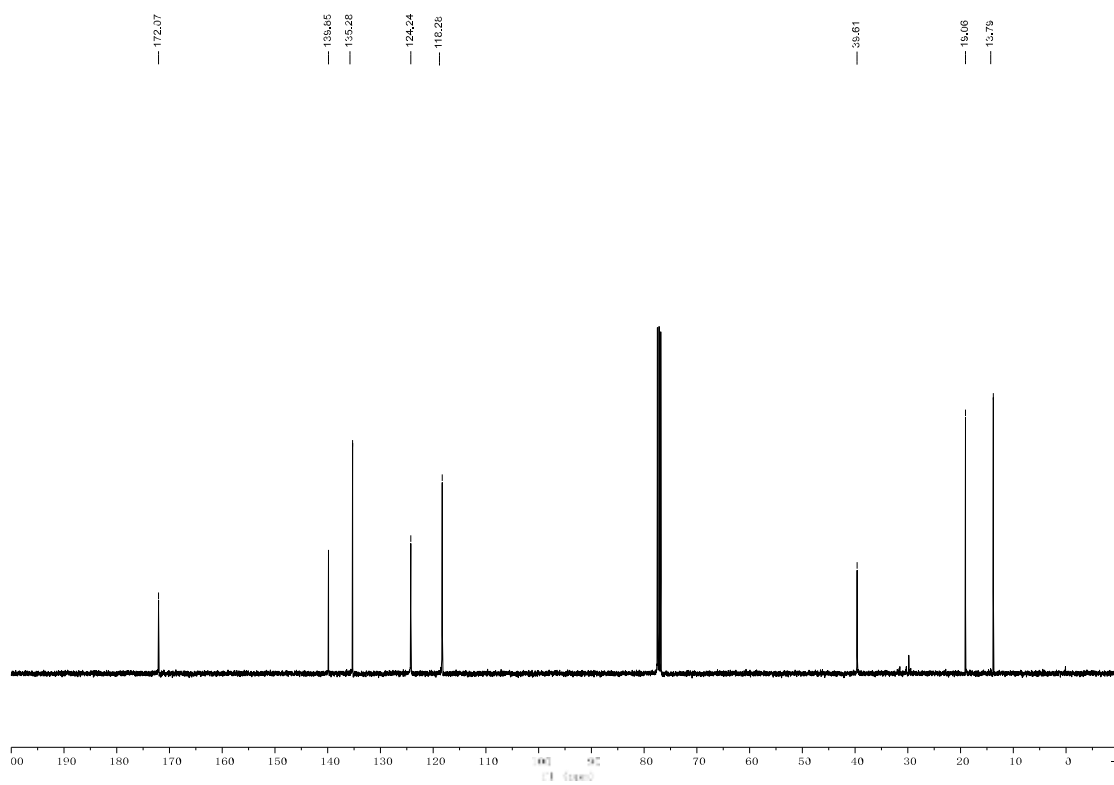

<sup>1</sup>H NMR spectra for **5a**

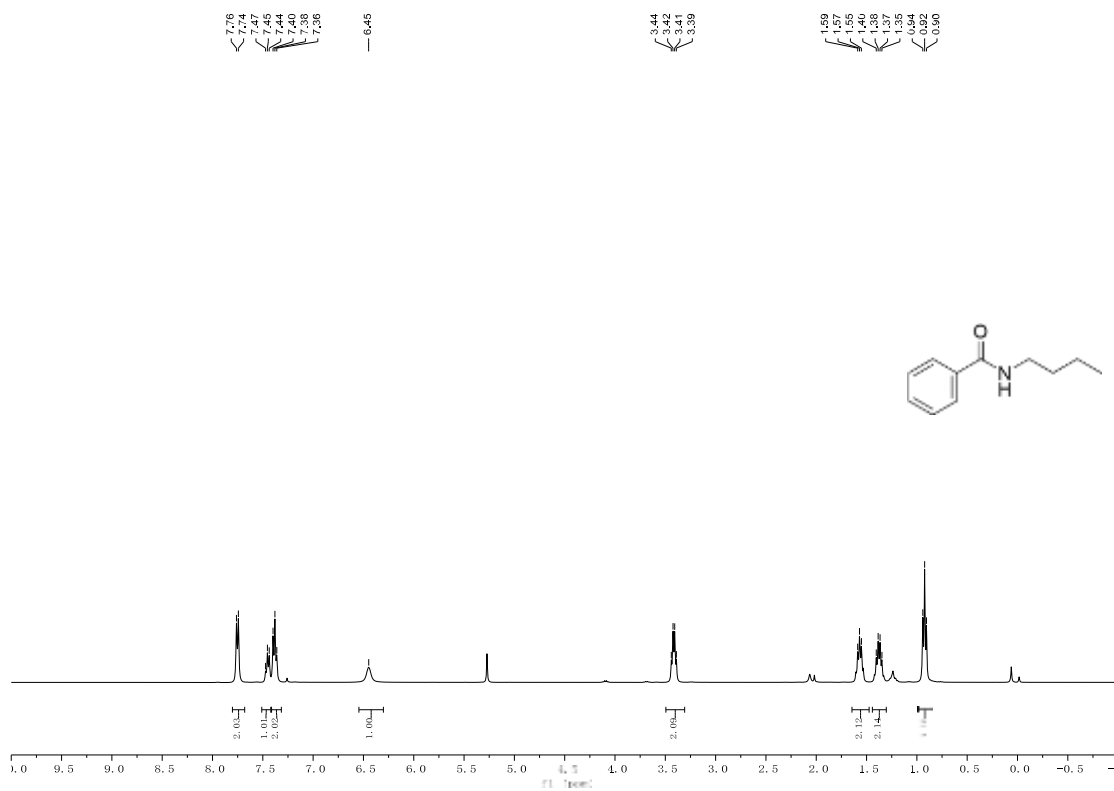



### $^{13}\text{C}$ NMR spectra for **5a**

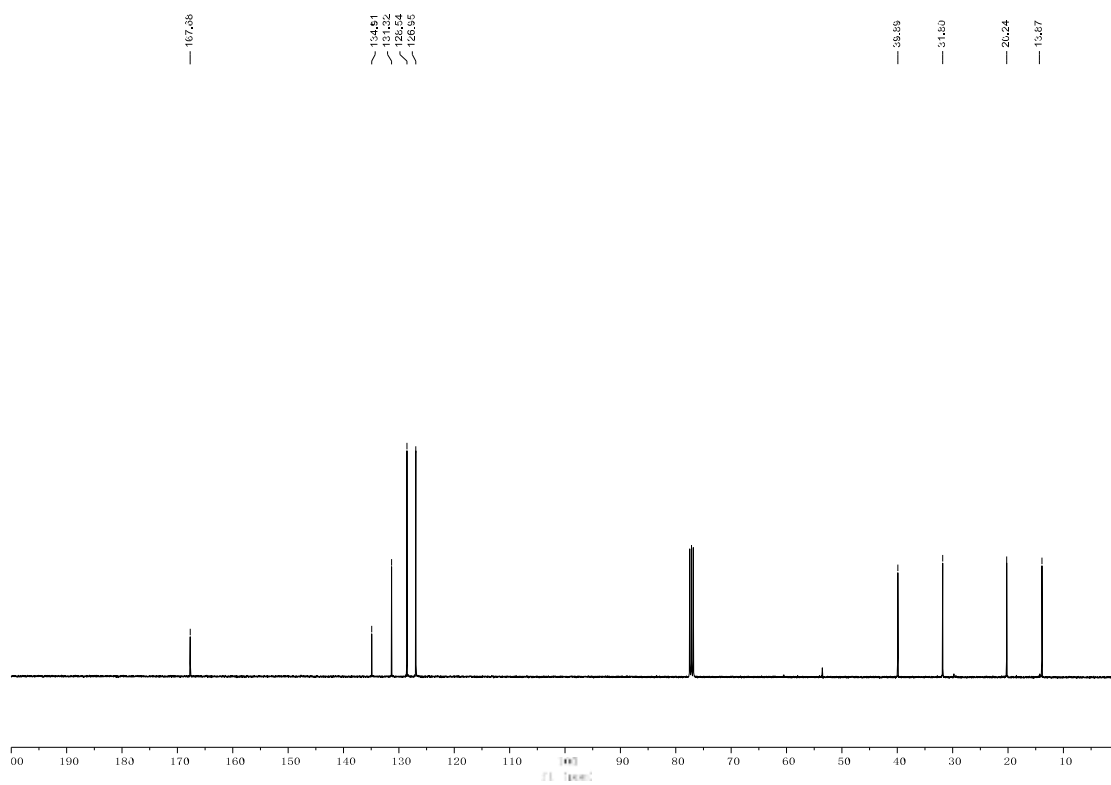

### $^1\text{H}$ NMR spectra for **5b**

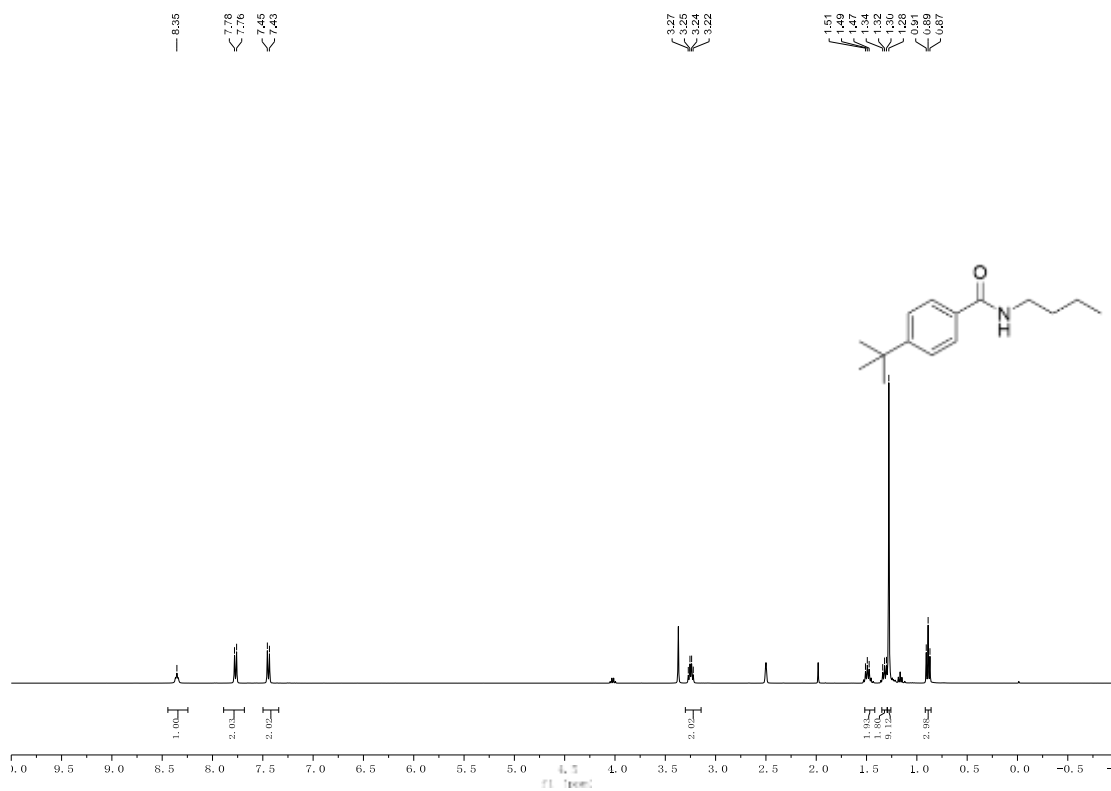

### $^{13}\text{C}$ NMR spectra for **5b**

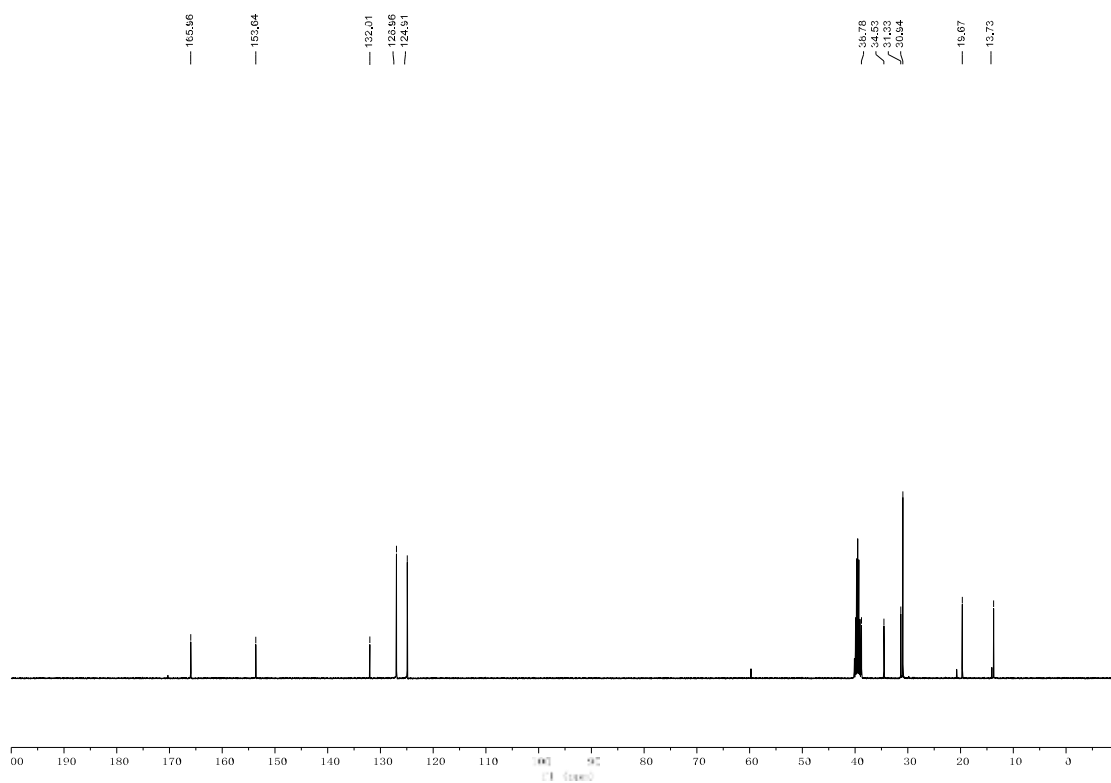

### $^1\text{H}$ NMR spectra for **5c**

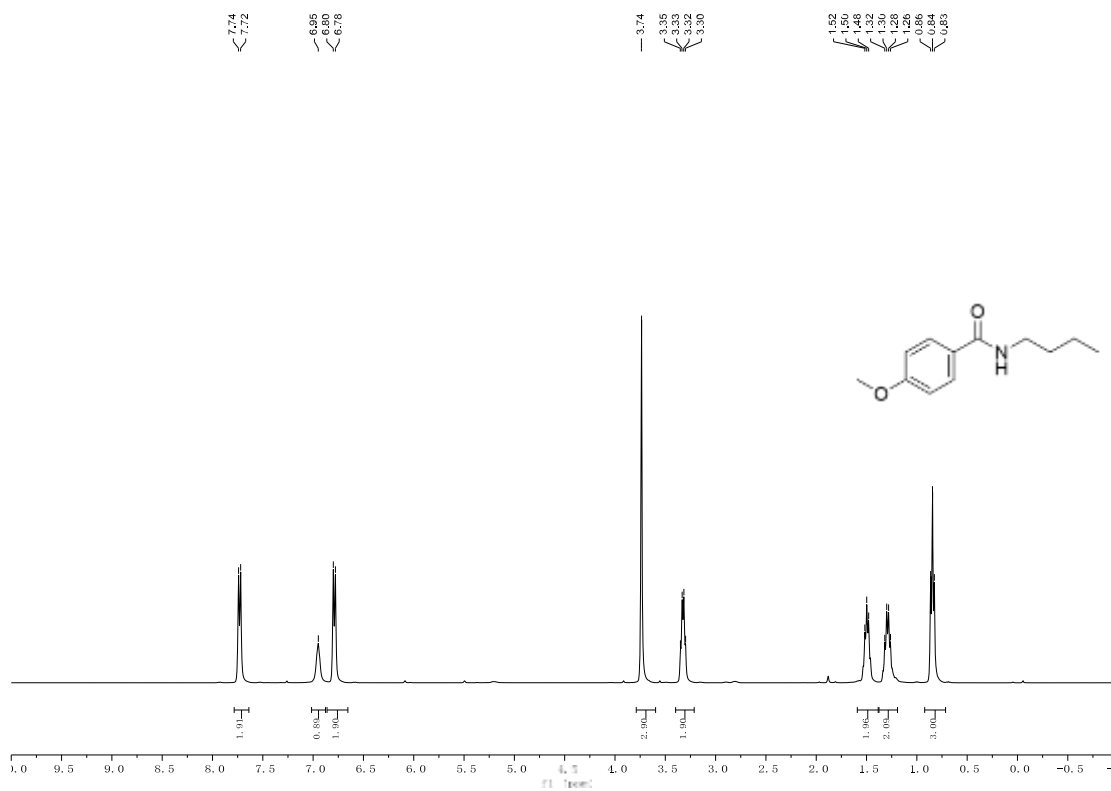

<sup>13</sup>C NMR spectra for **5c**

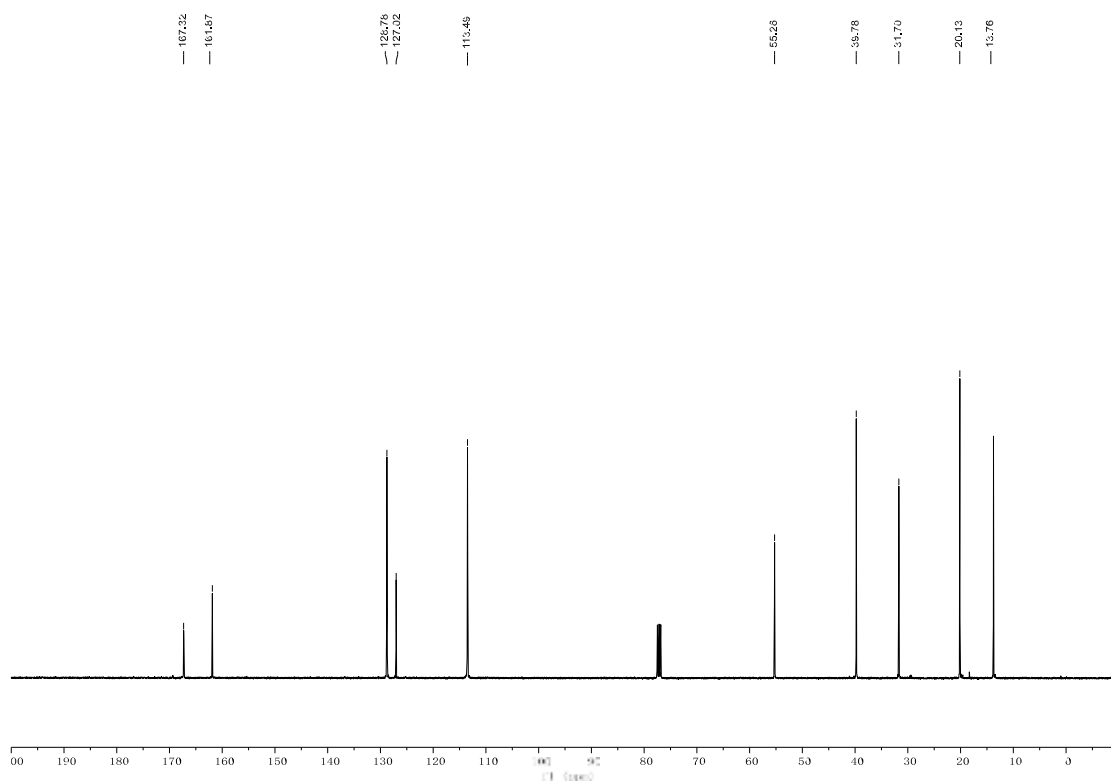

<sup>1</sup>H NMR spectra for **5d**

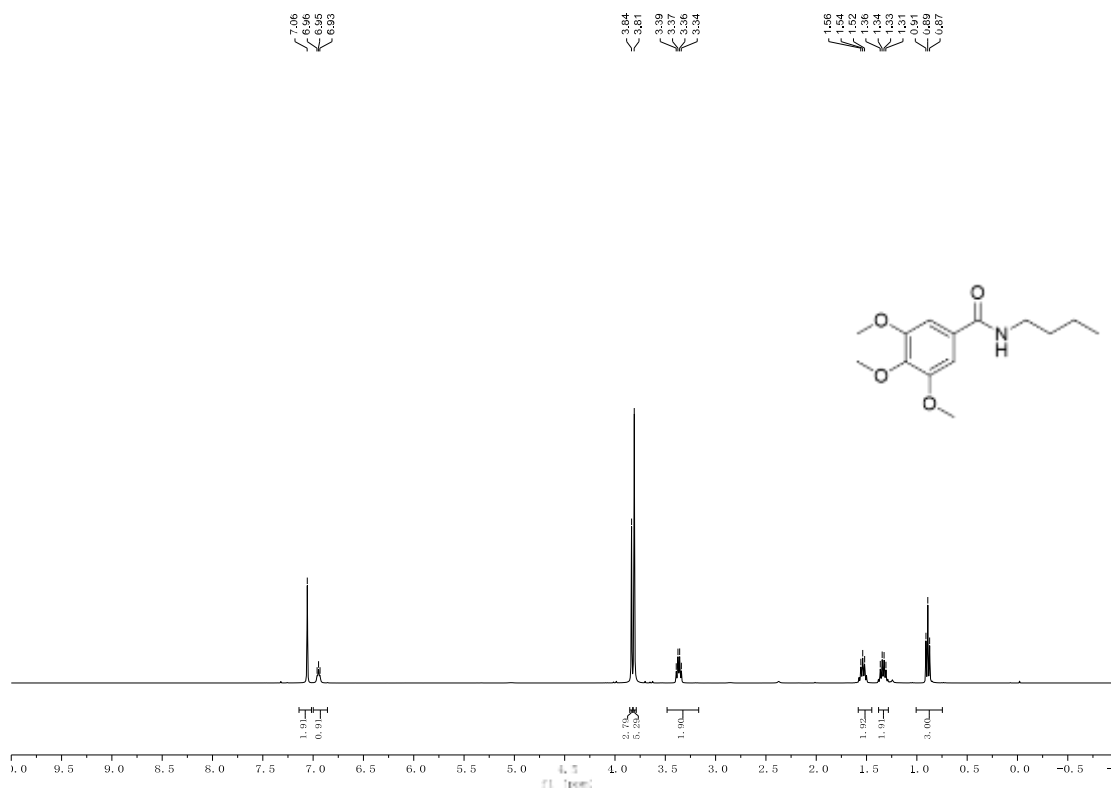

### $^{13}\text{C}$ NMR spectra for **5d**

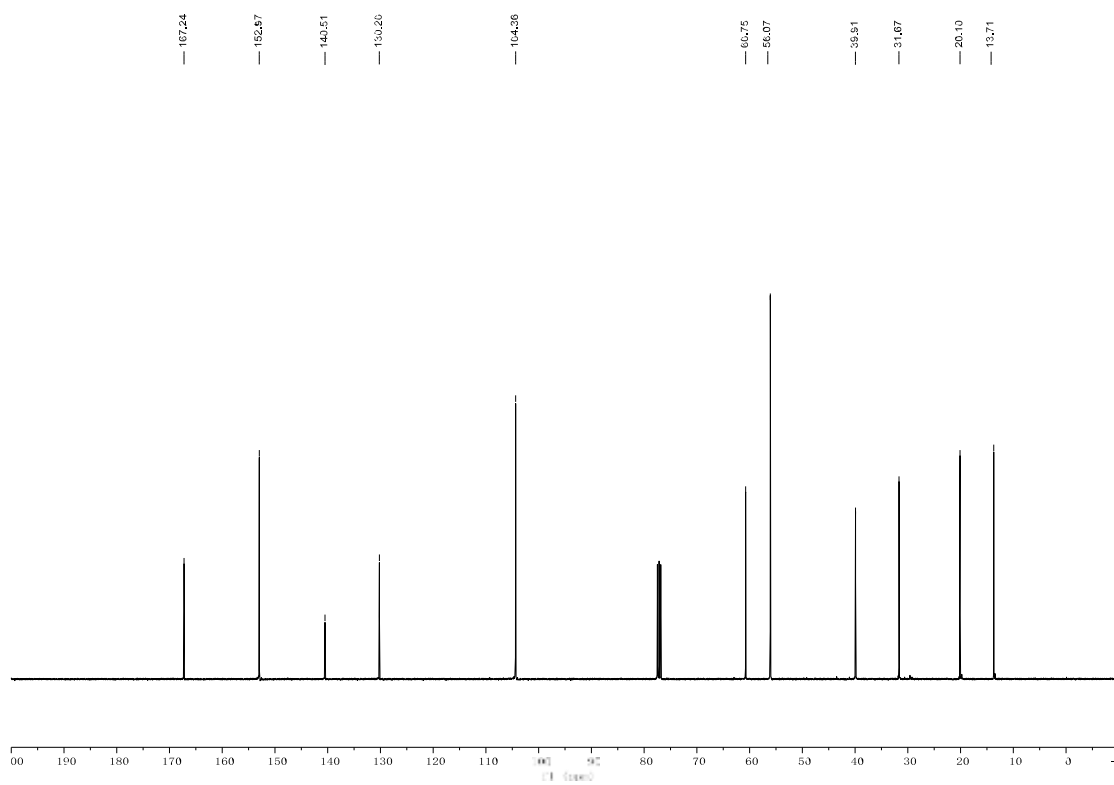

### $^1\text{H}$ NMR spectra for **5e**

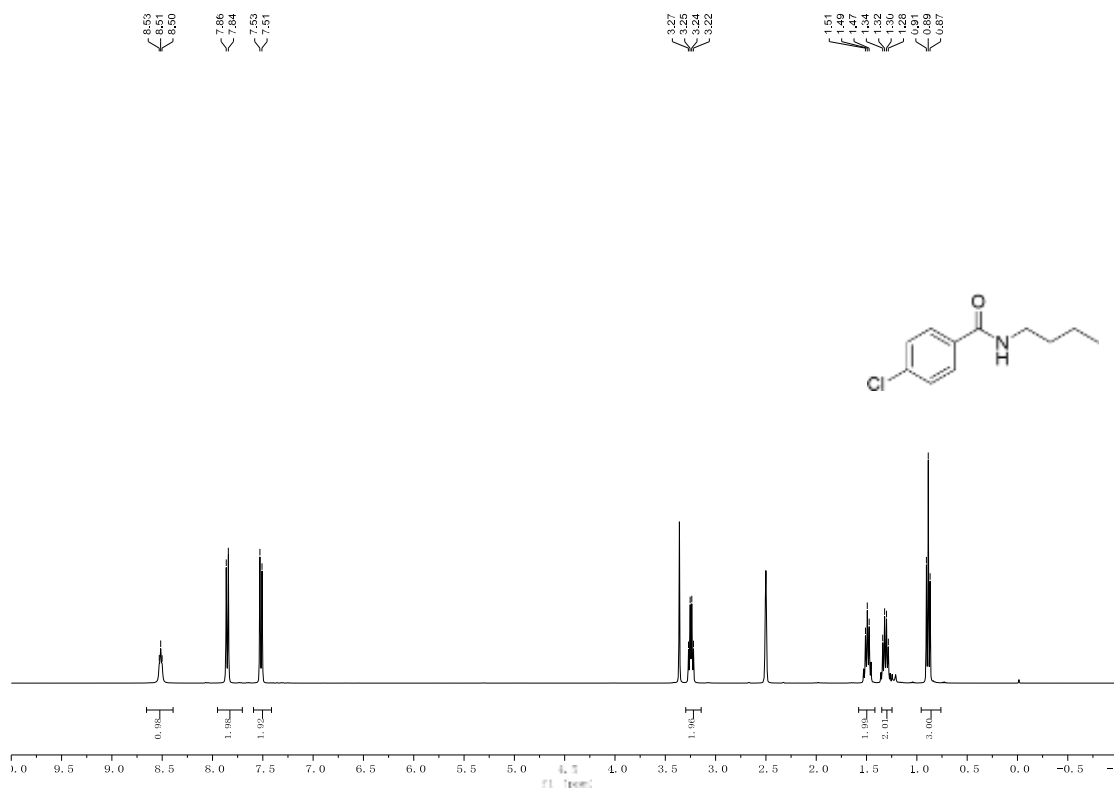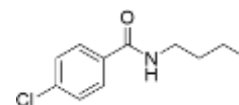

### <sup>13</sup>C NMR spectra for **5e**

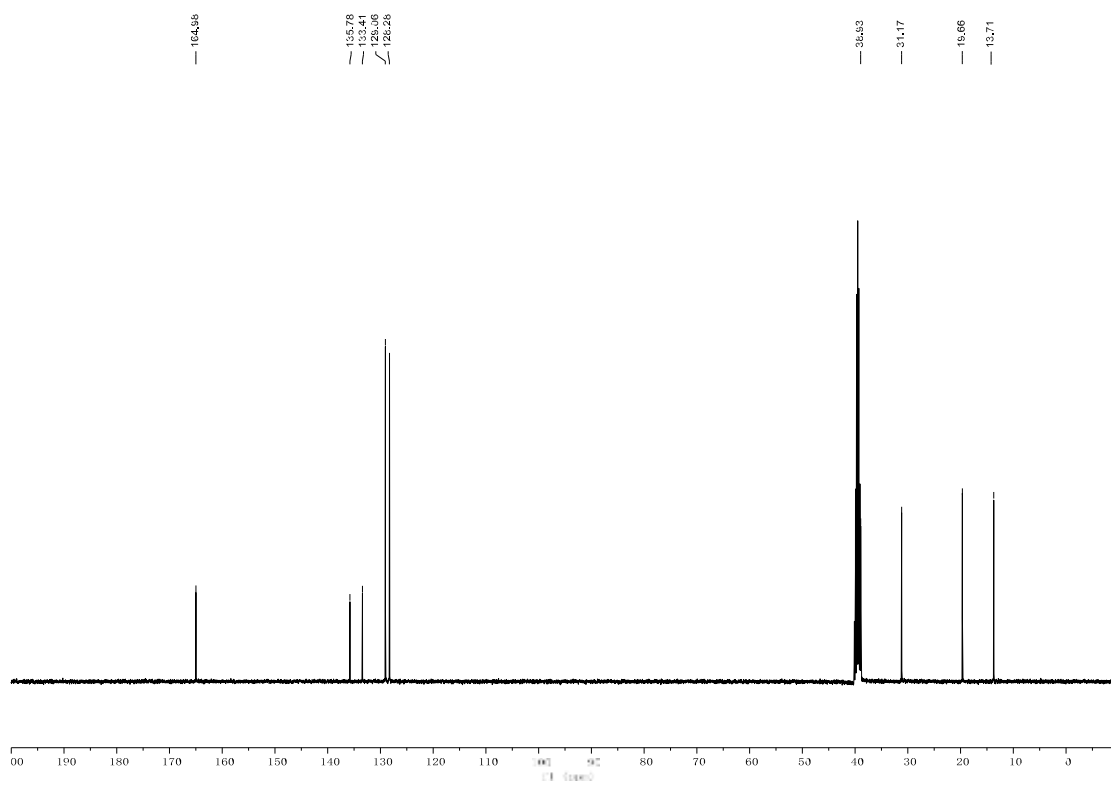

### <sup>1</sup>H NMR spectra for **5f**

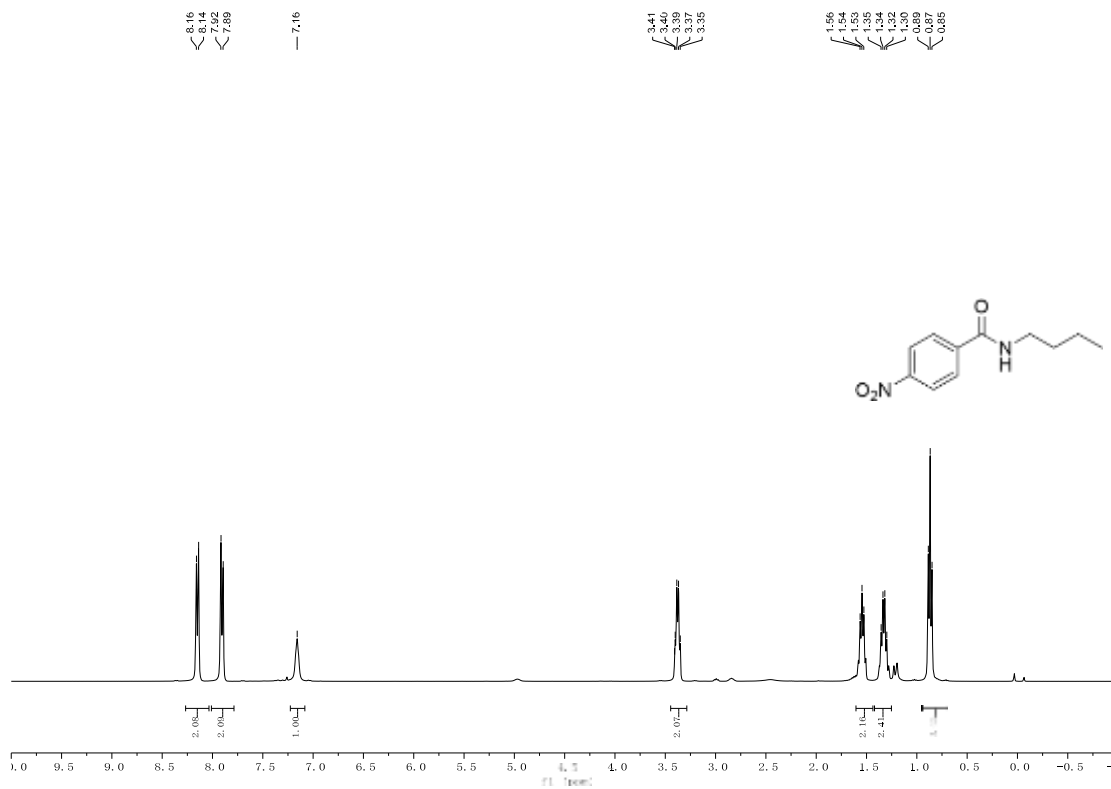

### $^{13}\text{C}$ NMR spectra for **5f**

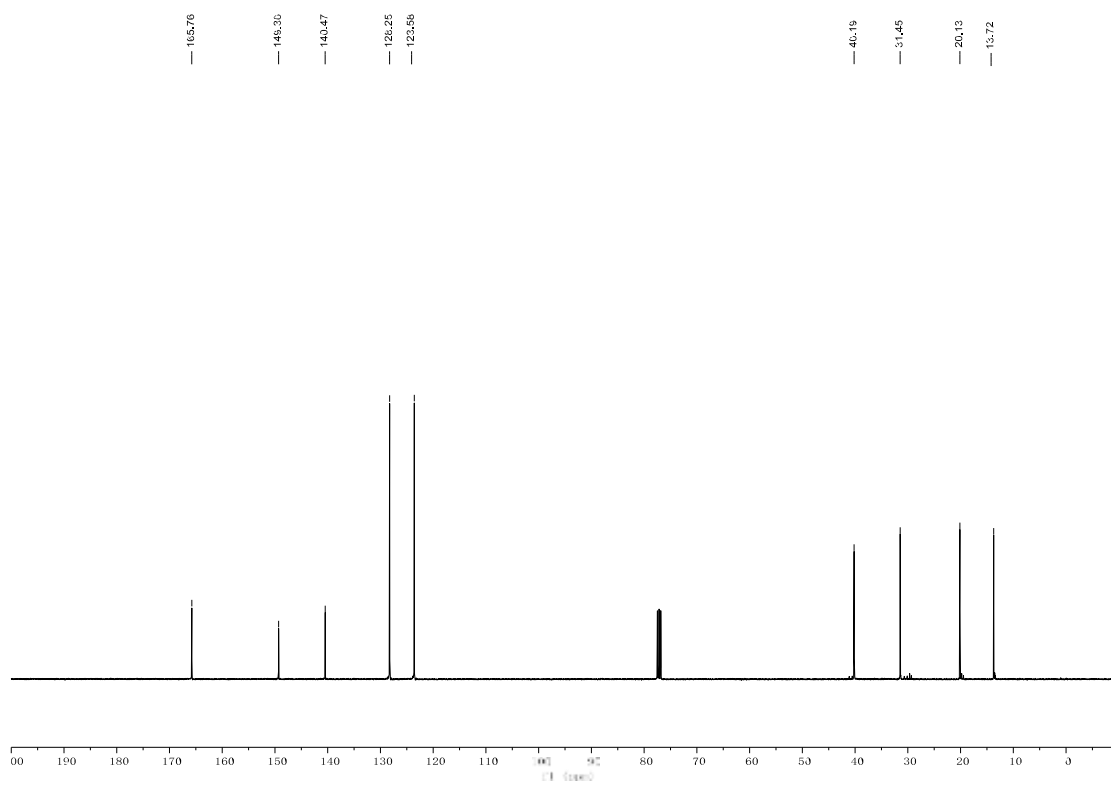

### $^1\text{H}$ NMR spectra for **5g**

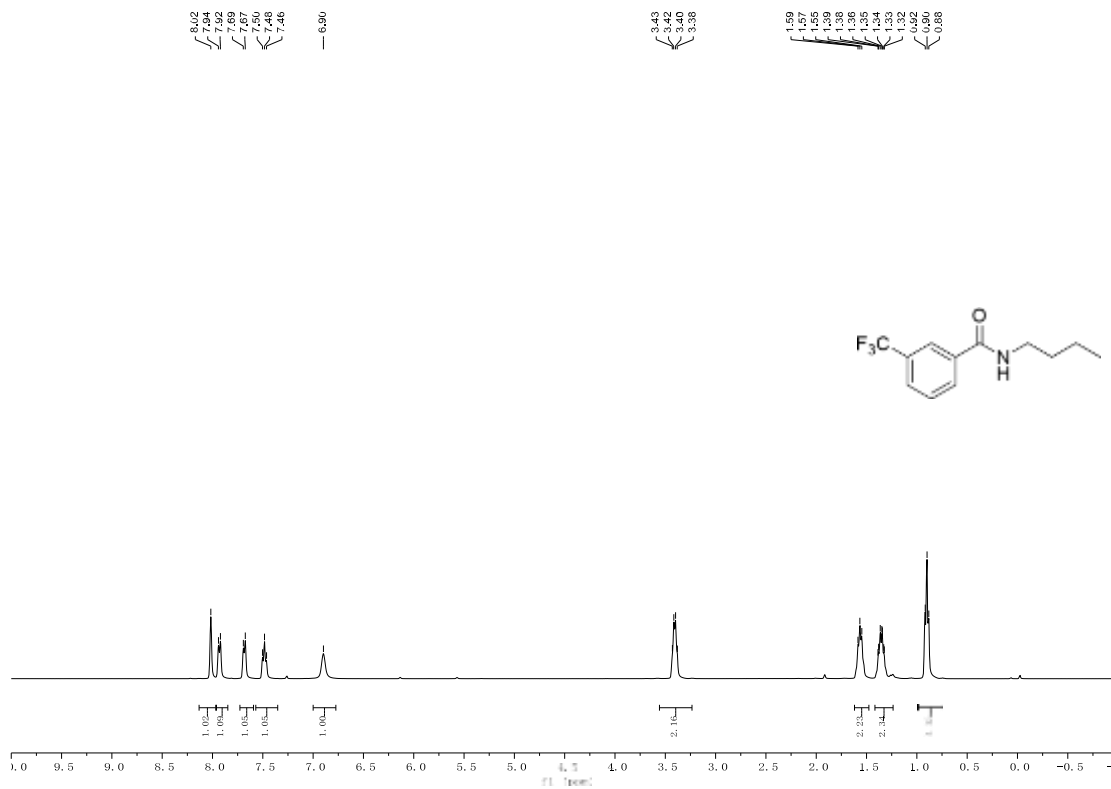

### $^{13}\text{C}$ NMR spectra for **5g**

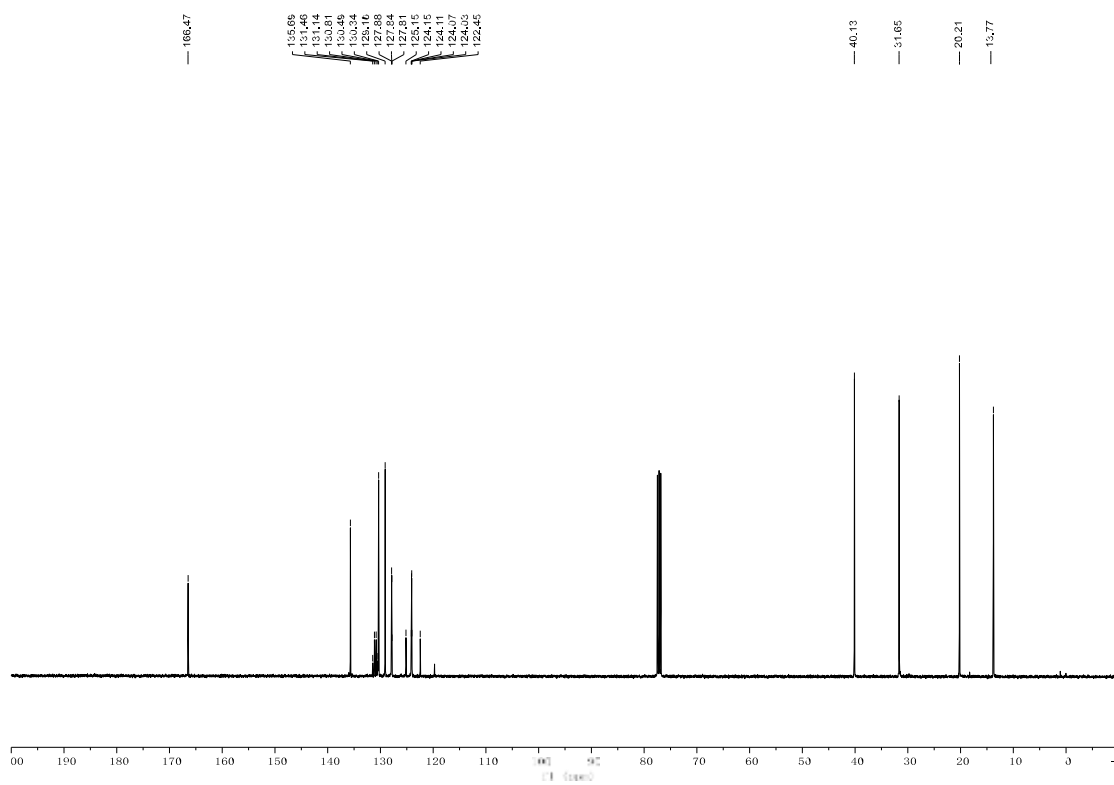

### $^{19}\text{F}$ NMR spectra for **5g**

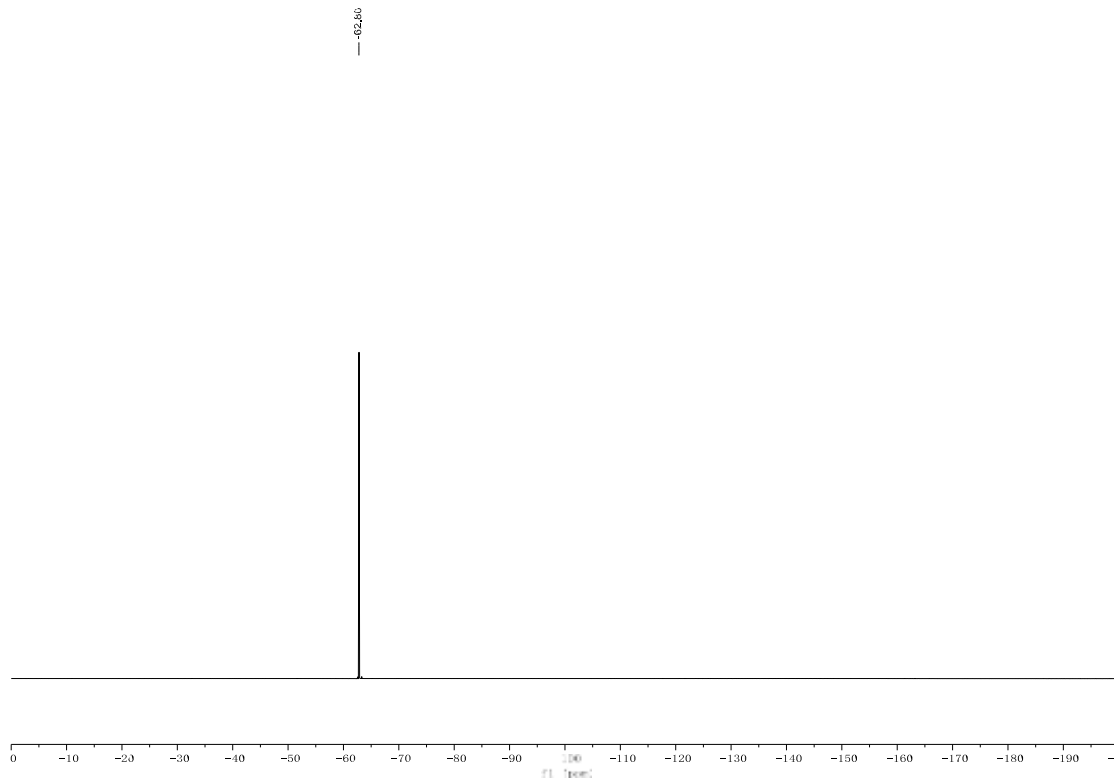

### $^1\text{H}$ NMR spectra for **7h**

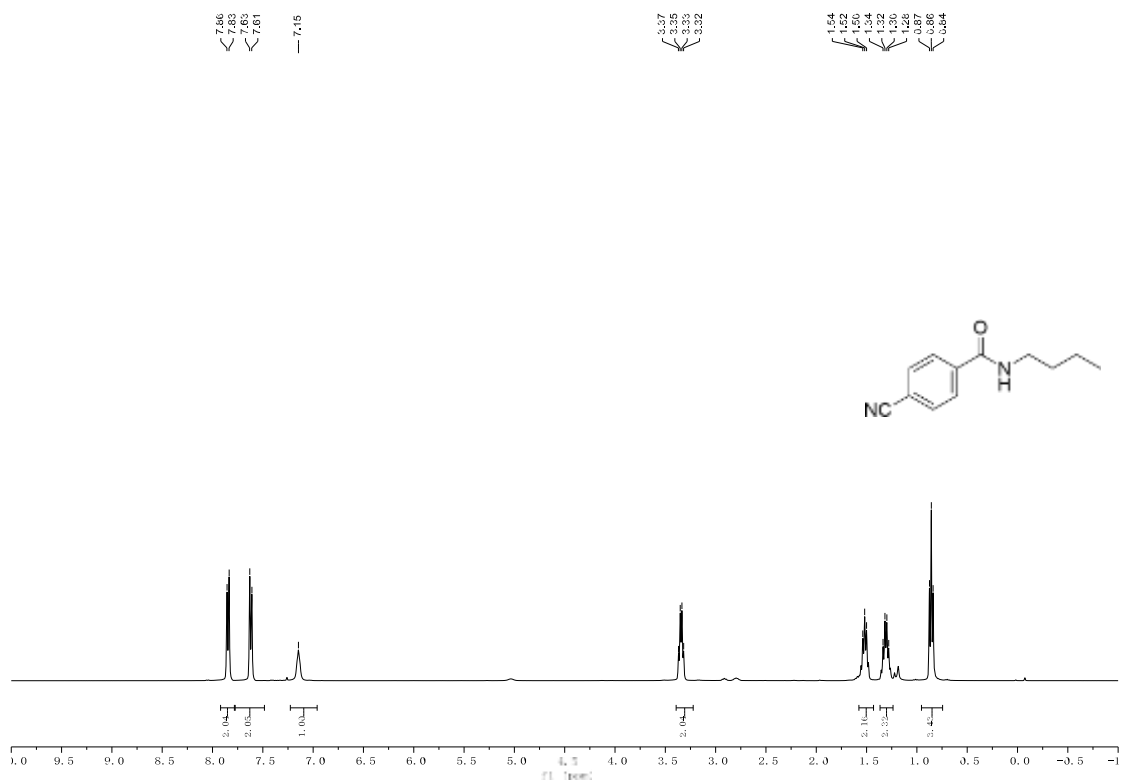

### $^{13}\text{C}$ NMR spectra for **5h**

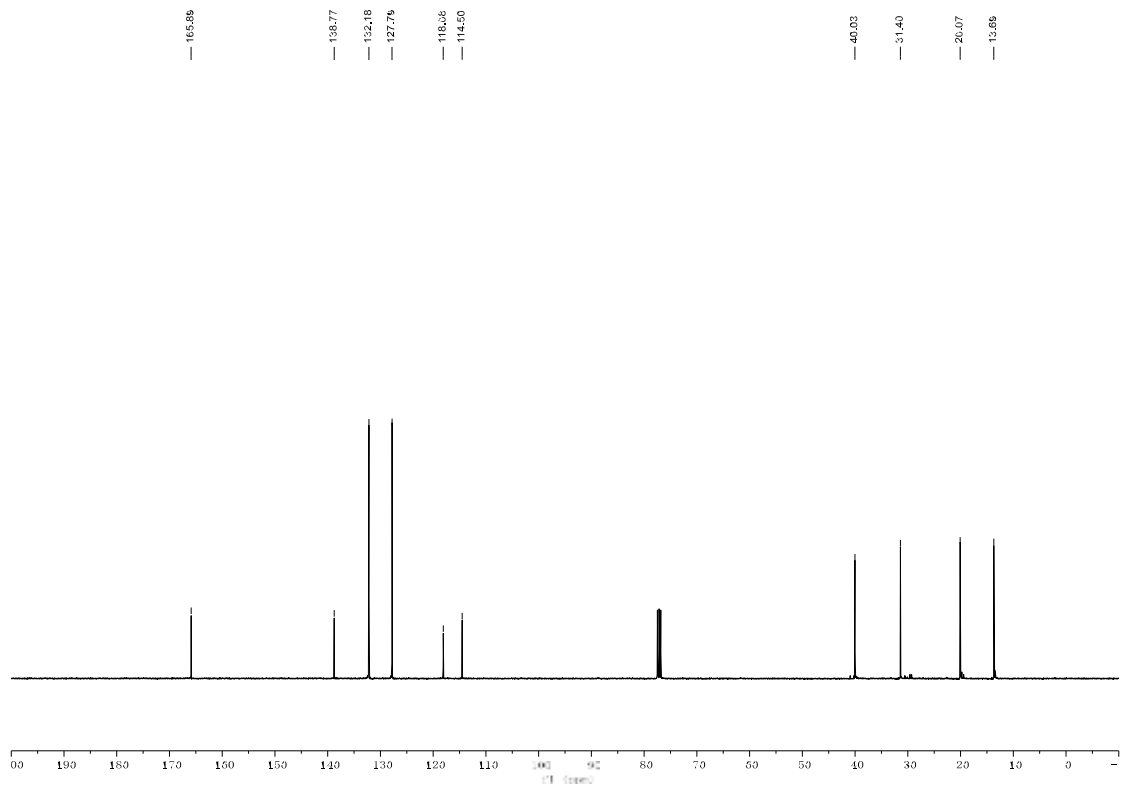



# <sup>1</sup>H NMR spectra for **5i**

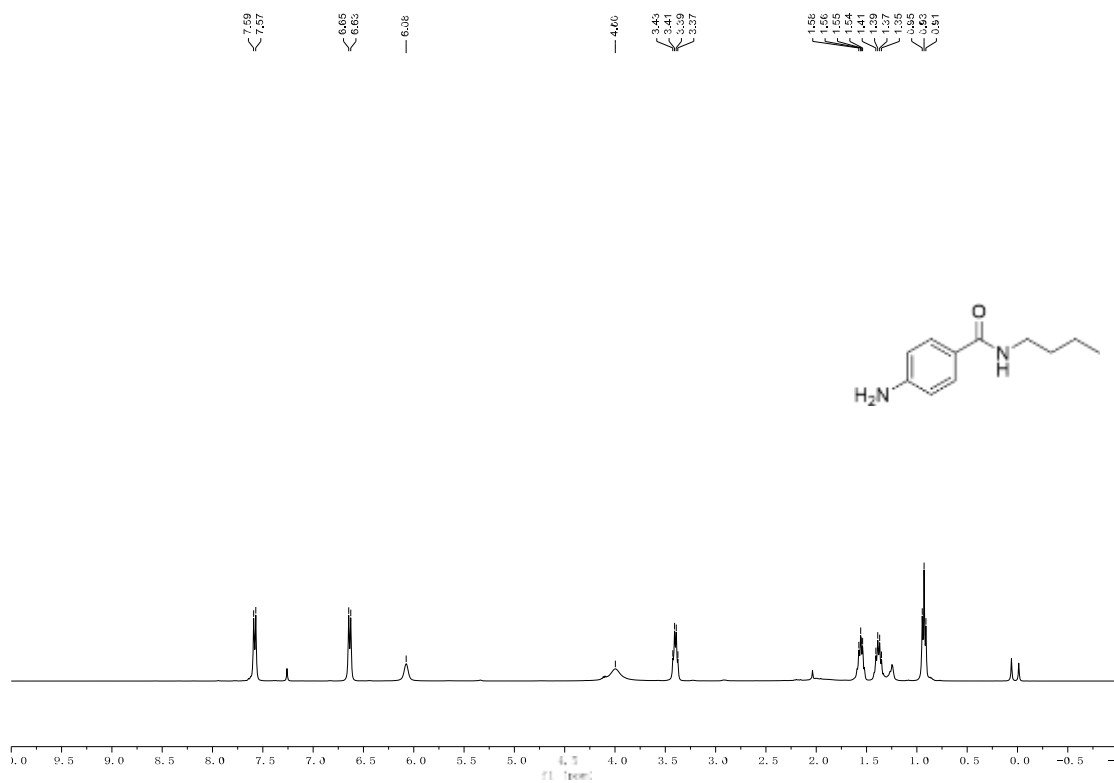

# <sup>13</sup>C NMR spectra for **5i**

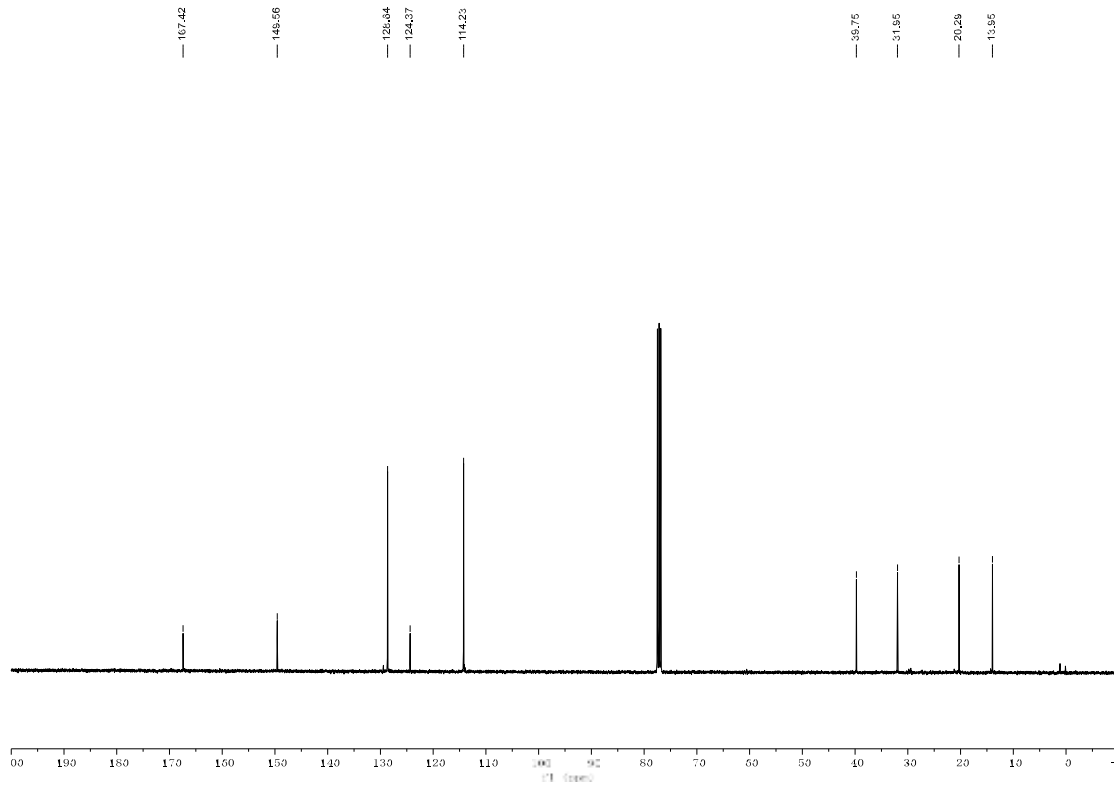

<sup>1</sup>H NMR spectra for **5j**

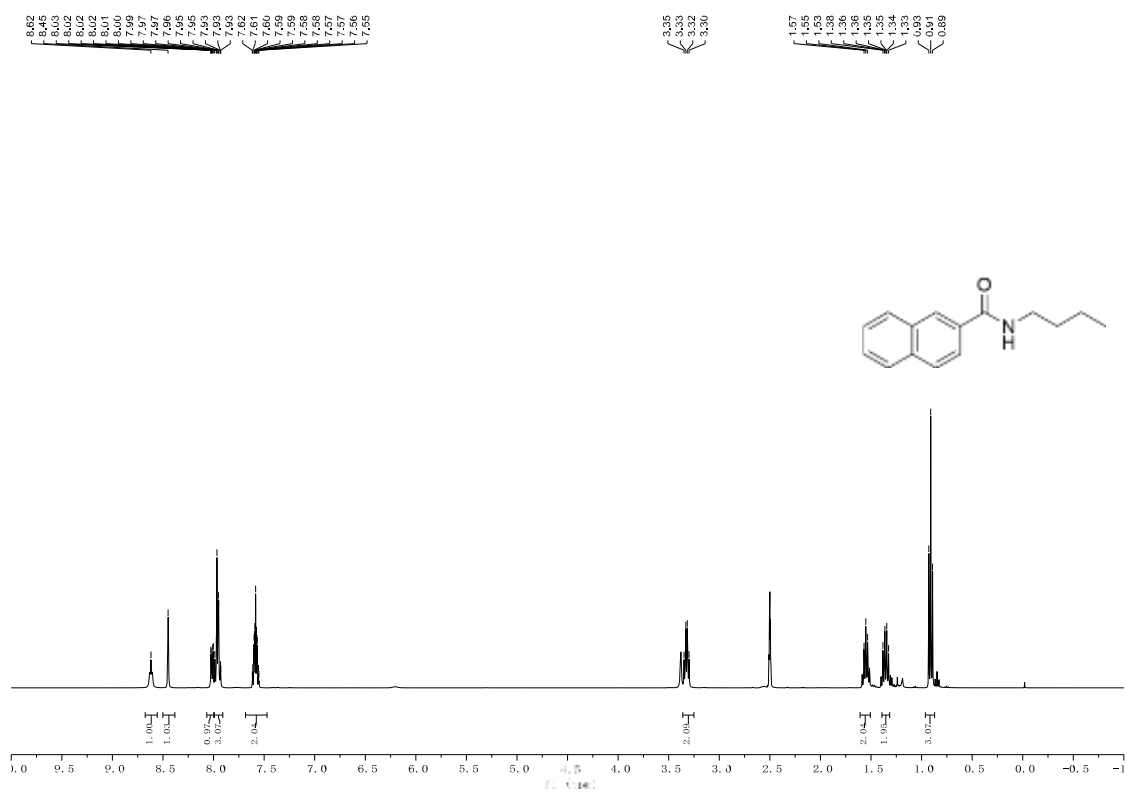

<sup>13</sup>C NMR spectra for **5j**

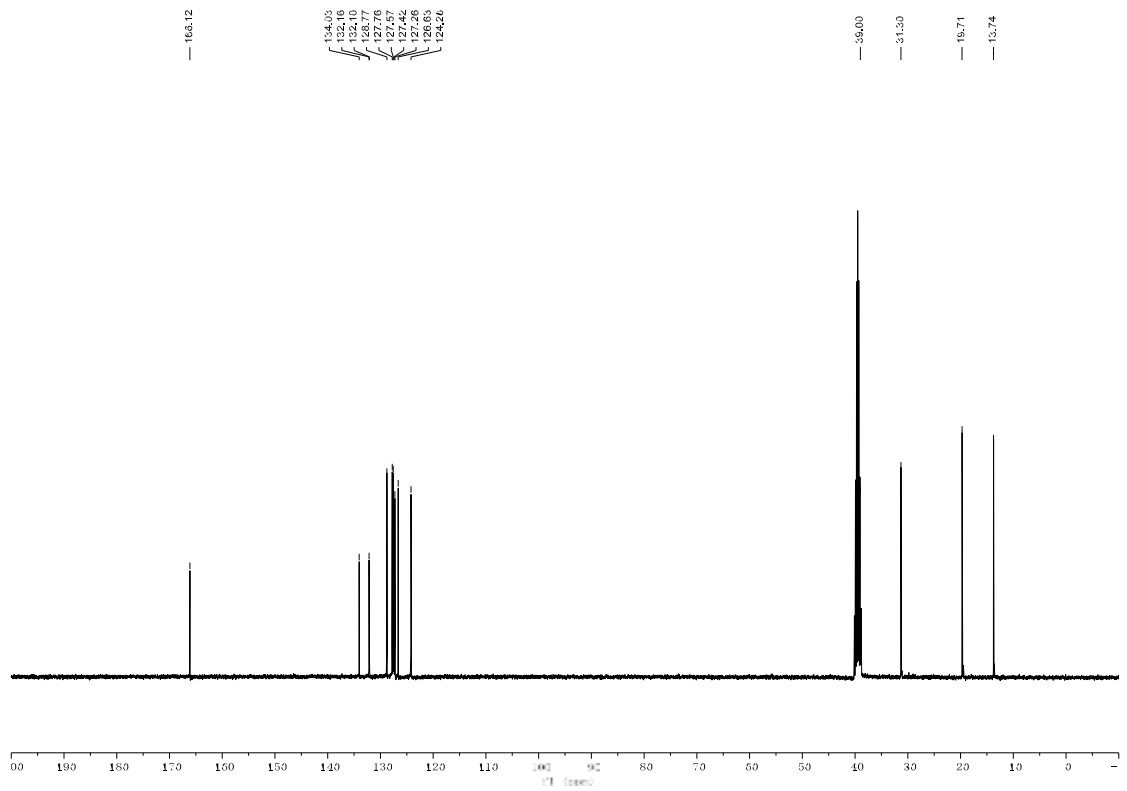

### $^1\text{H}$ NMR spectra for **5k**

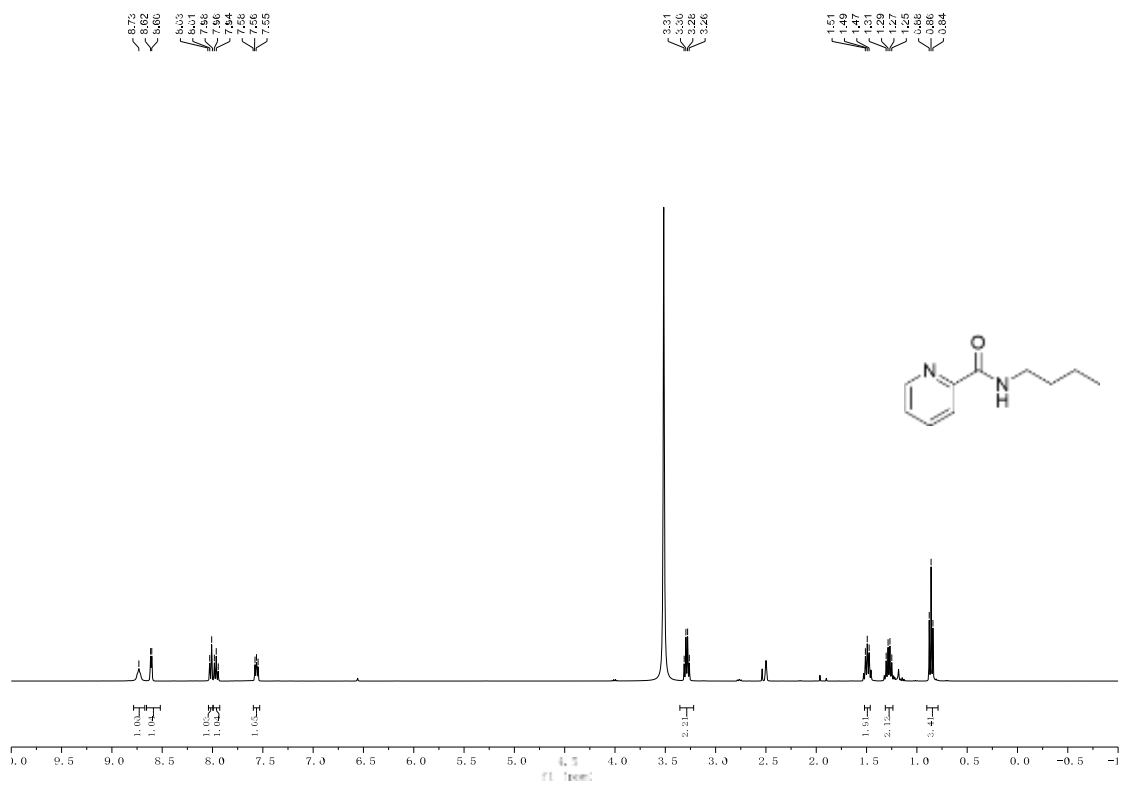

### $^{13}\text{C}$ NMR spectra for **5k**

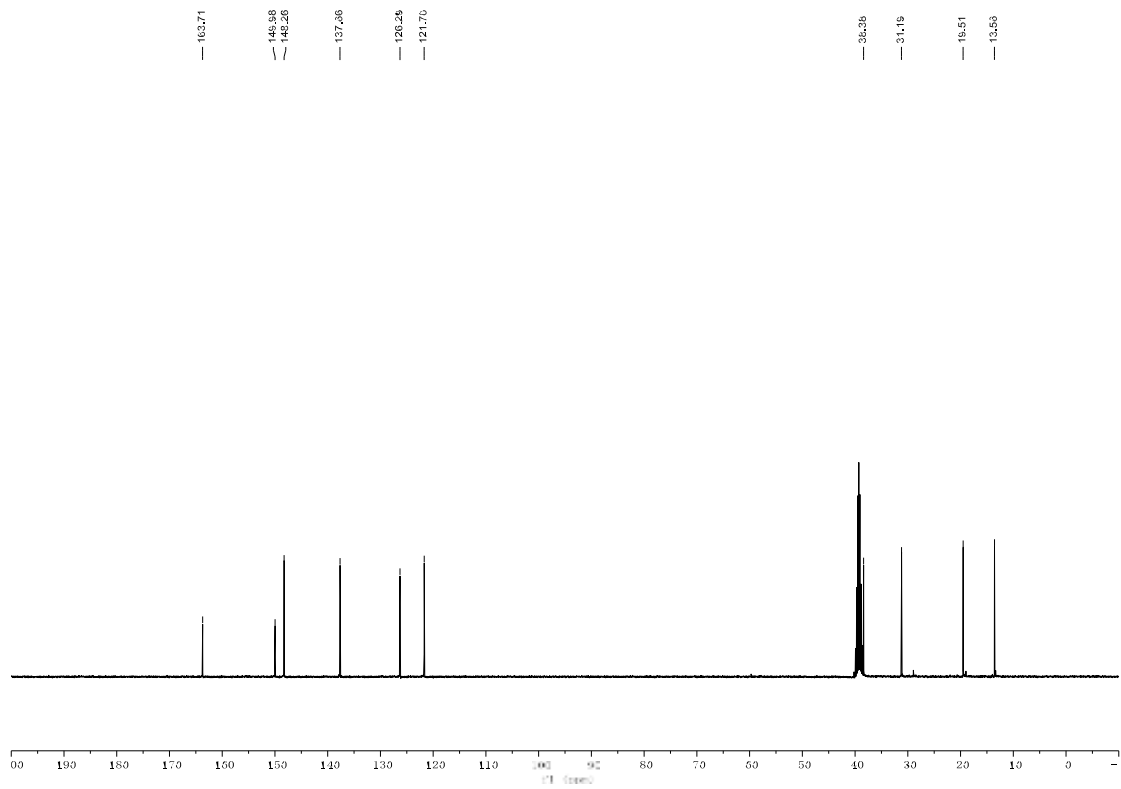

# <sup>1</sup>H NMR spectra for **51**

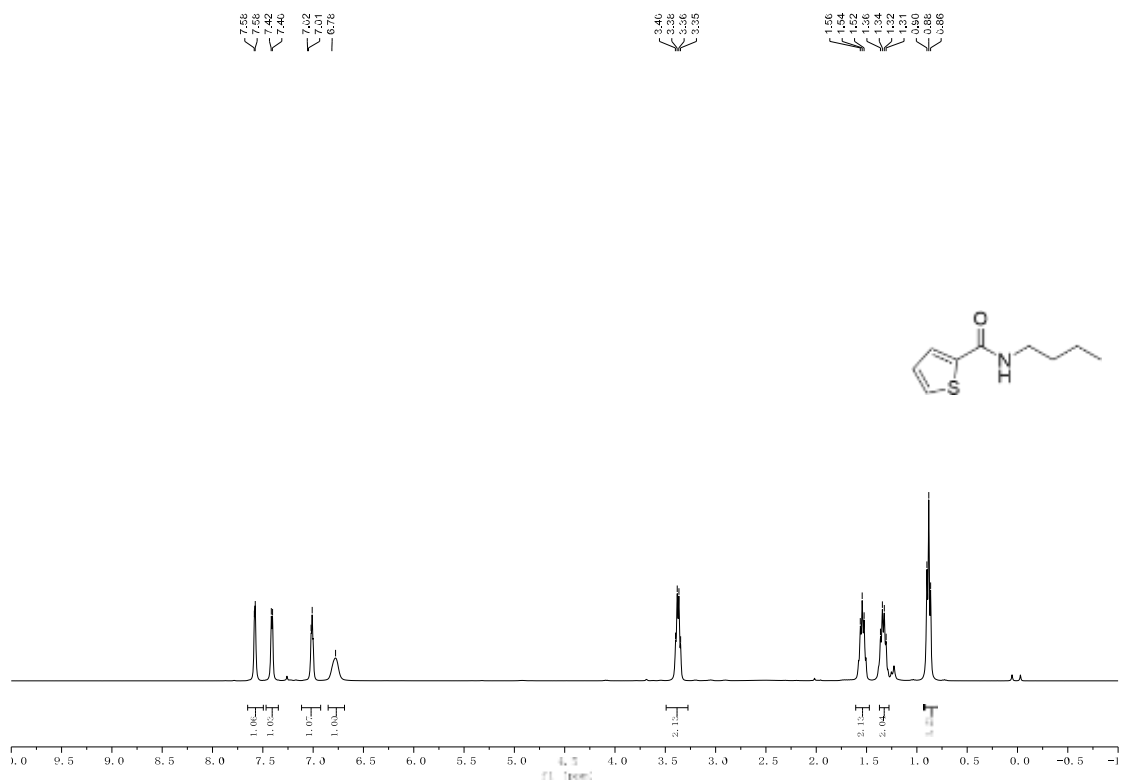

# <sup>13</sup>C NMR spectra for **51**

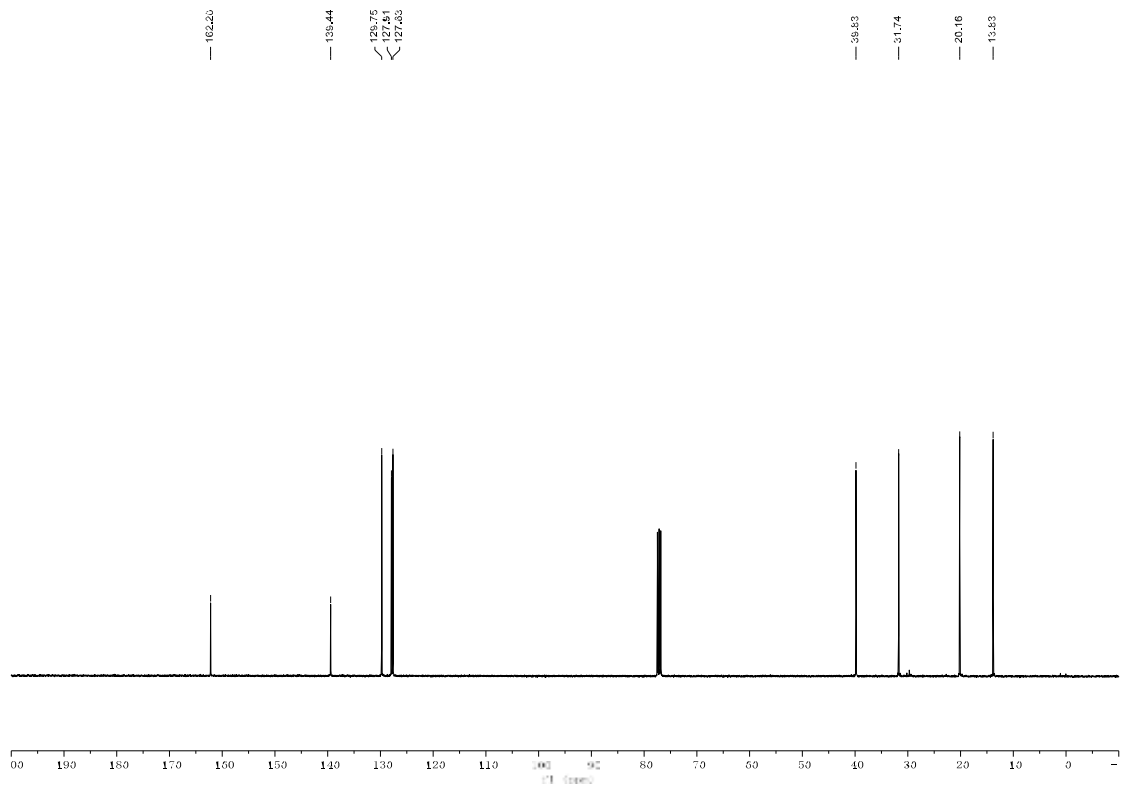

<sup>1</sup>H NMR spectra for **5m**

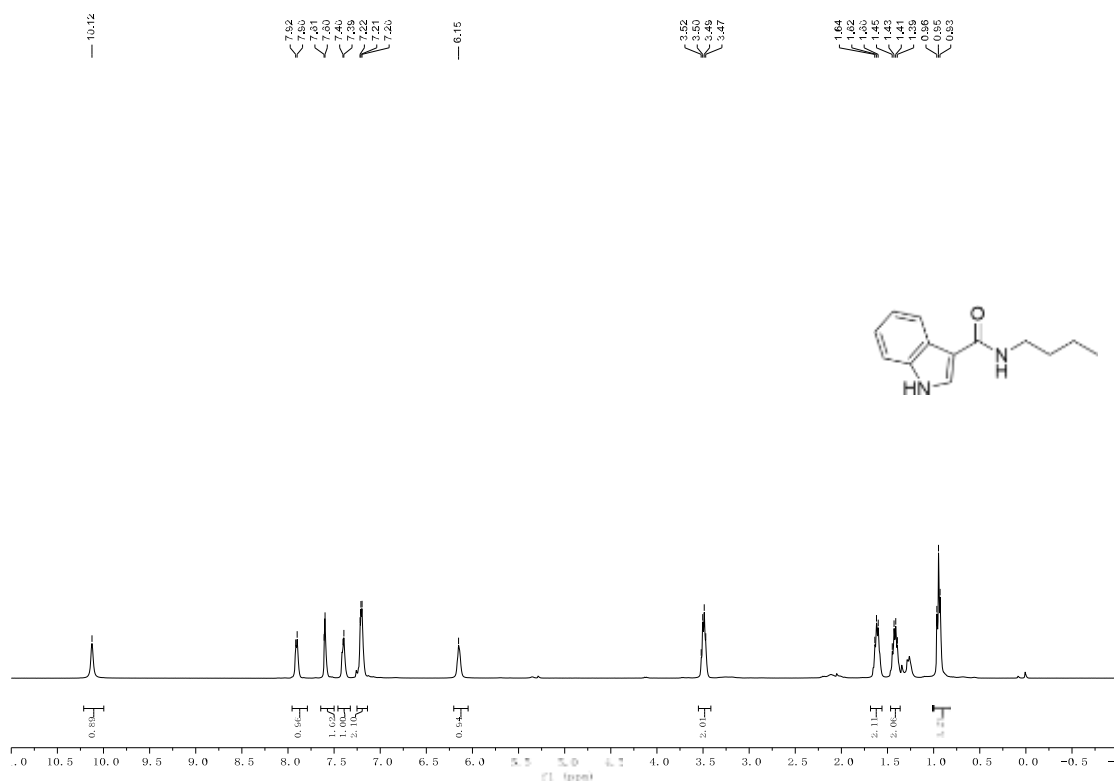

<sup>13</sup>C NMR spectra for **5m**

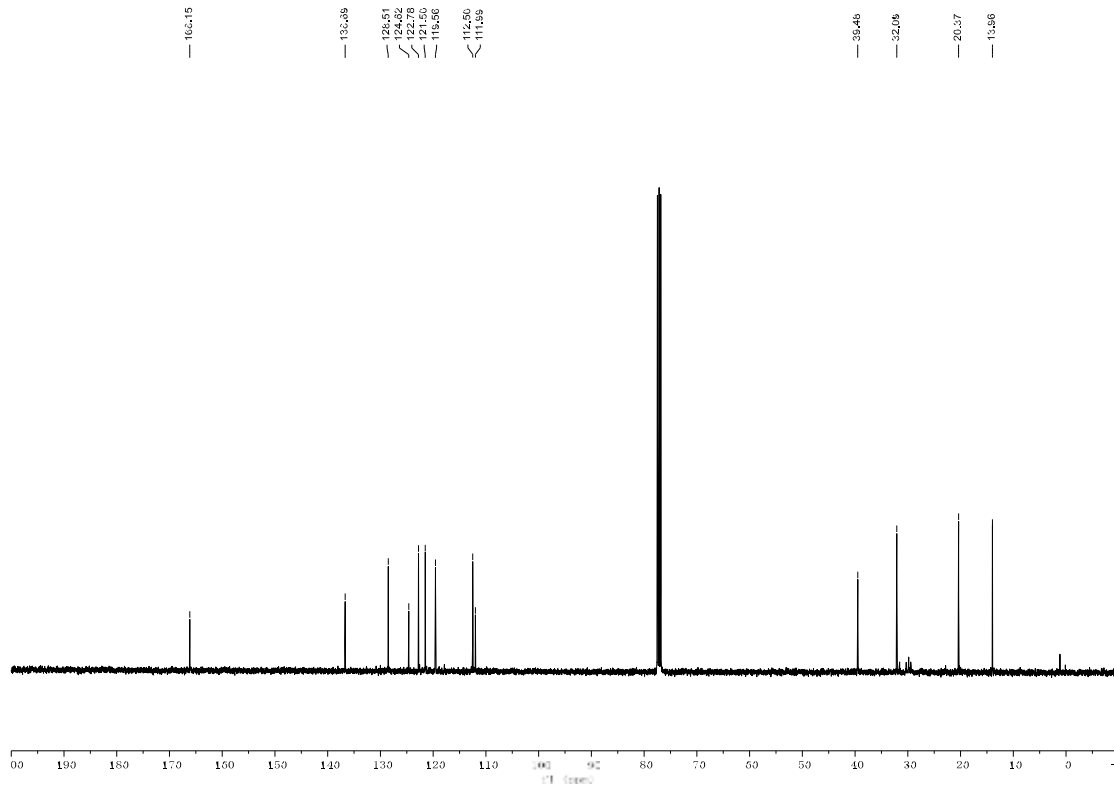

### $^1\text{H}$ NMR spectra for **5n**

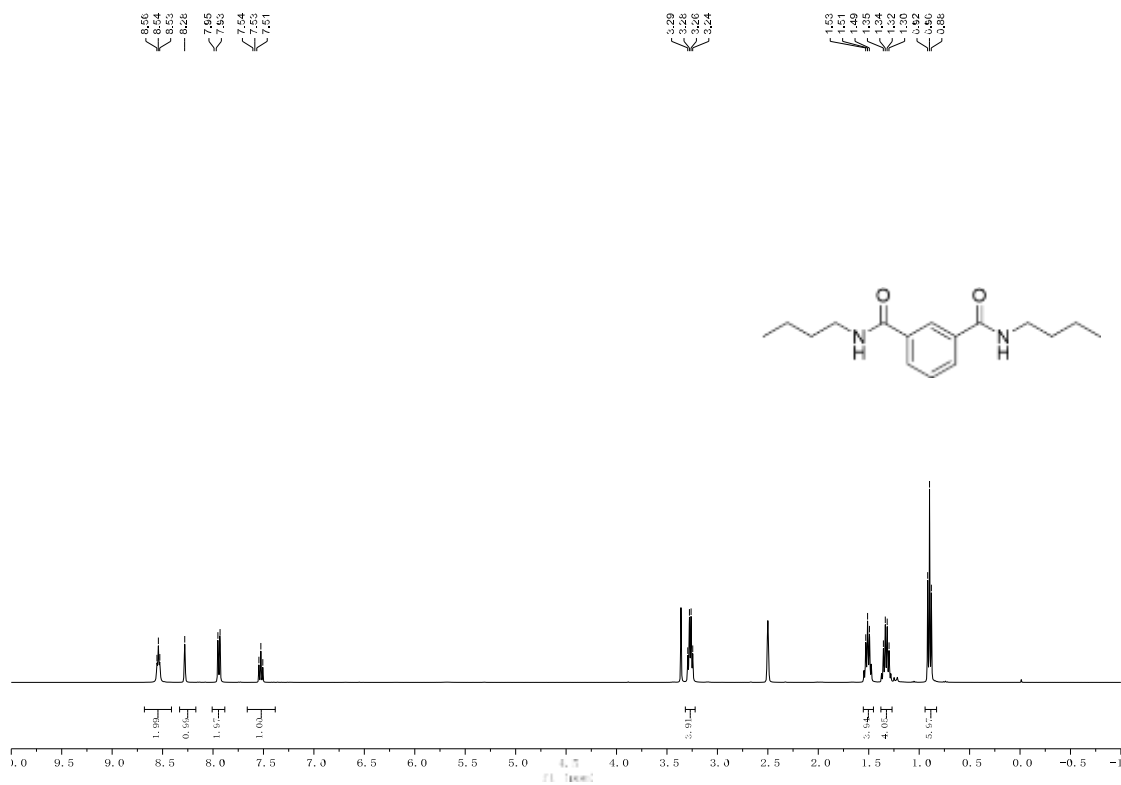

### $^{13}\text{C}$ NMR spectra for **5n**

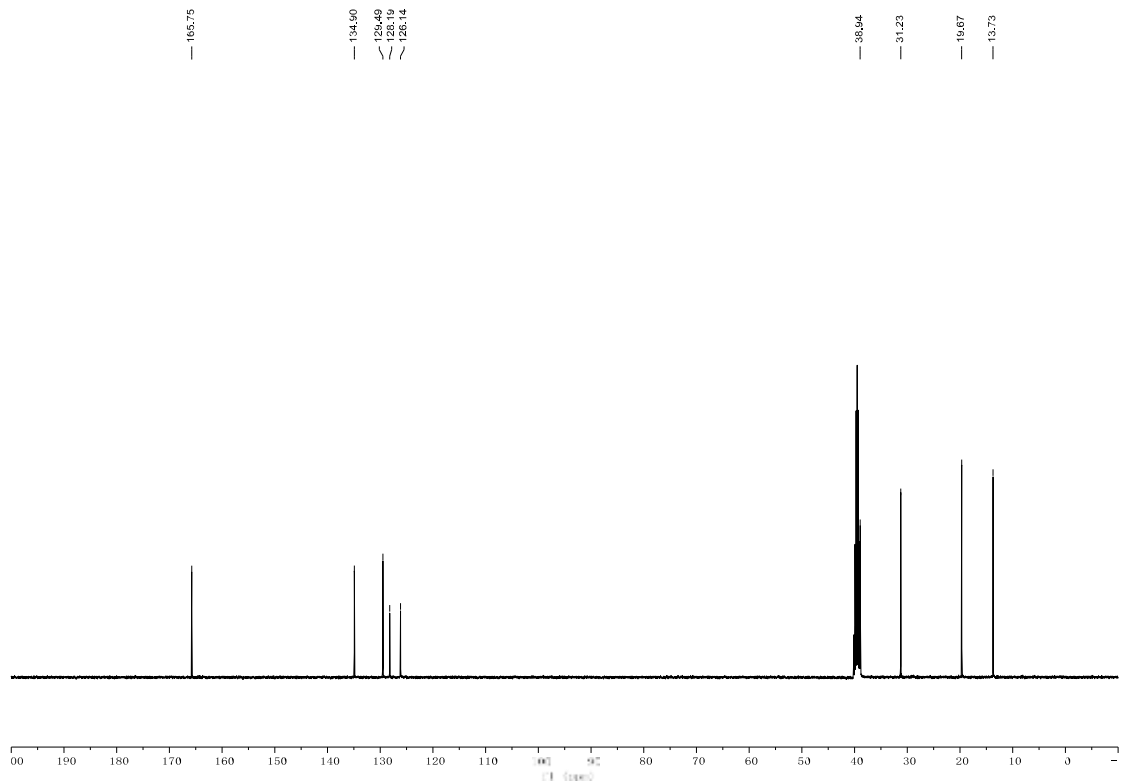

$^1\text{H}$  NMR spectra for **50**

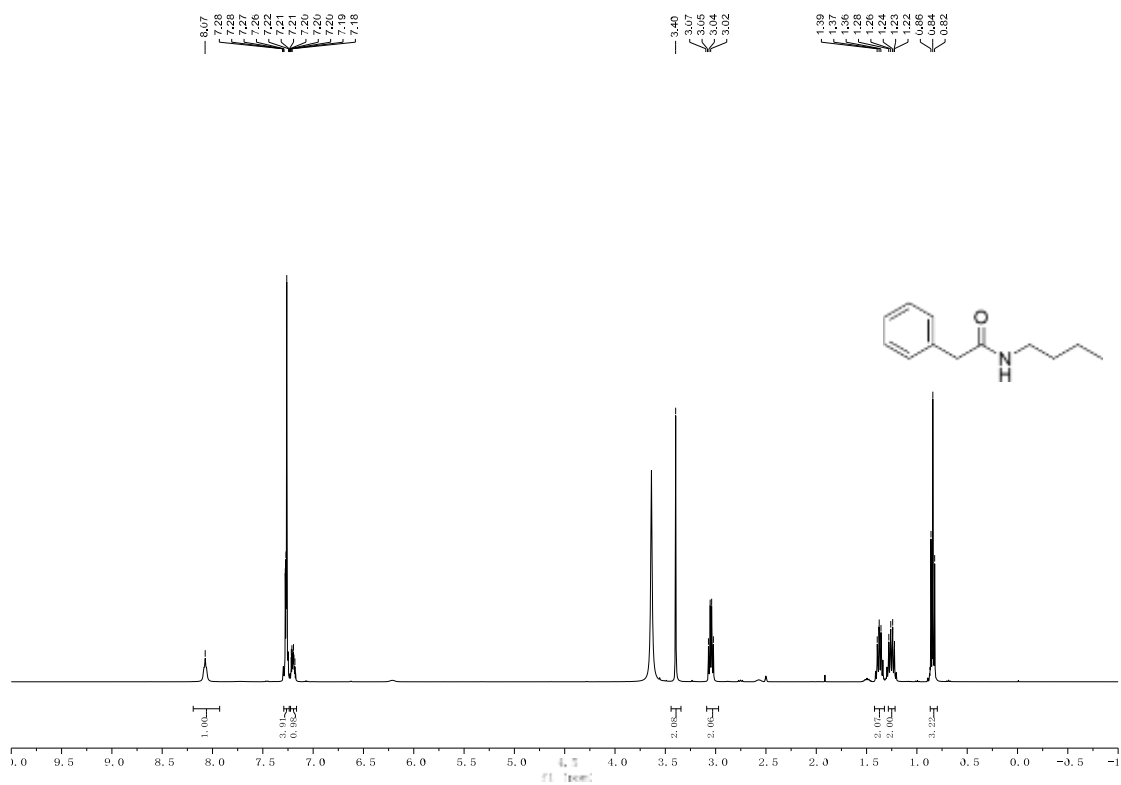

$^{13}\text{C}$  NMR spectra for **50**

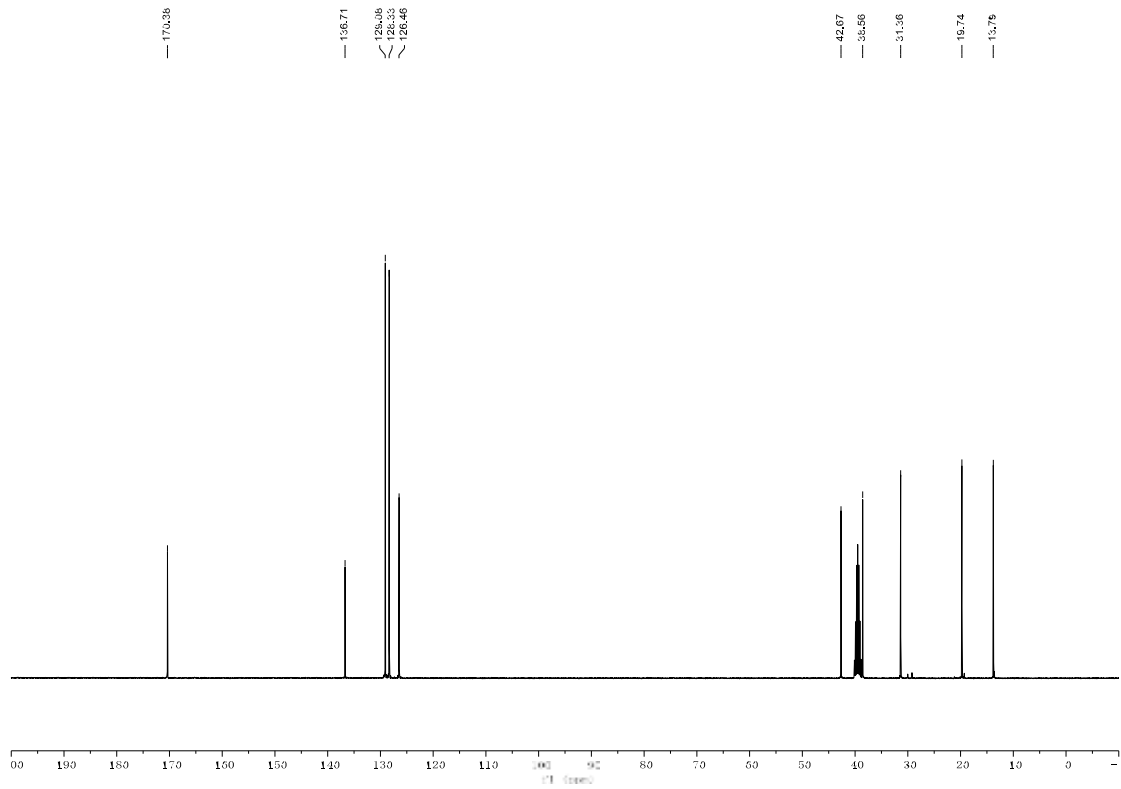

$^1\text{H}$  NMR spectra for **5p**

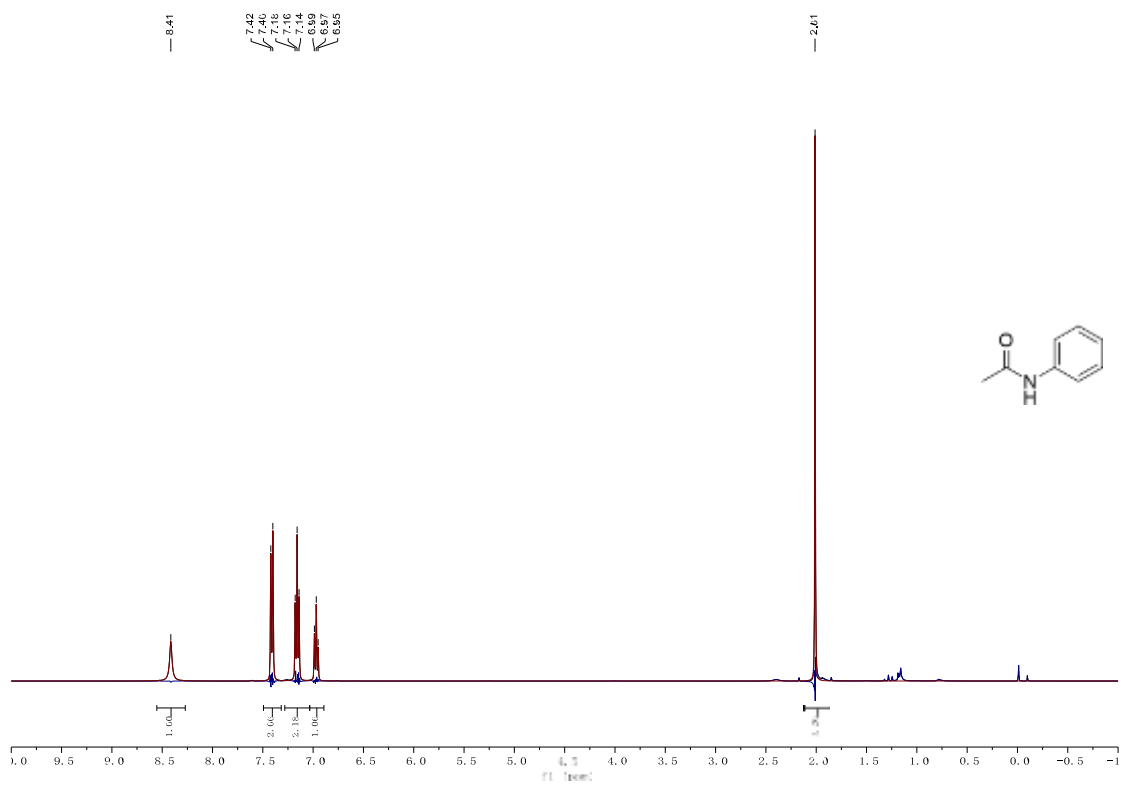

$^{13}\text{C}$  NMR spectra for **5p**

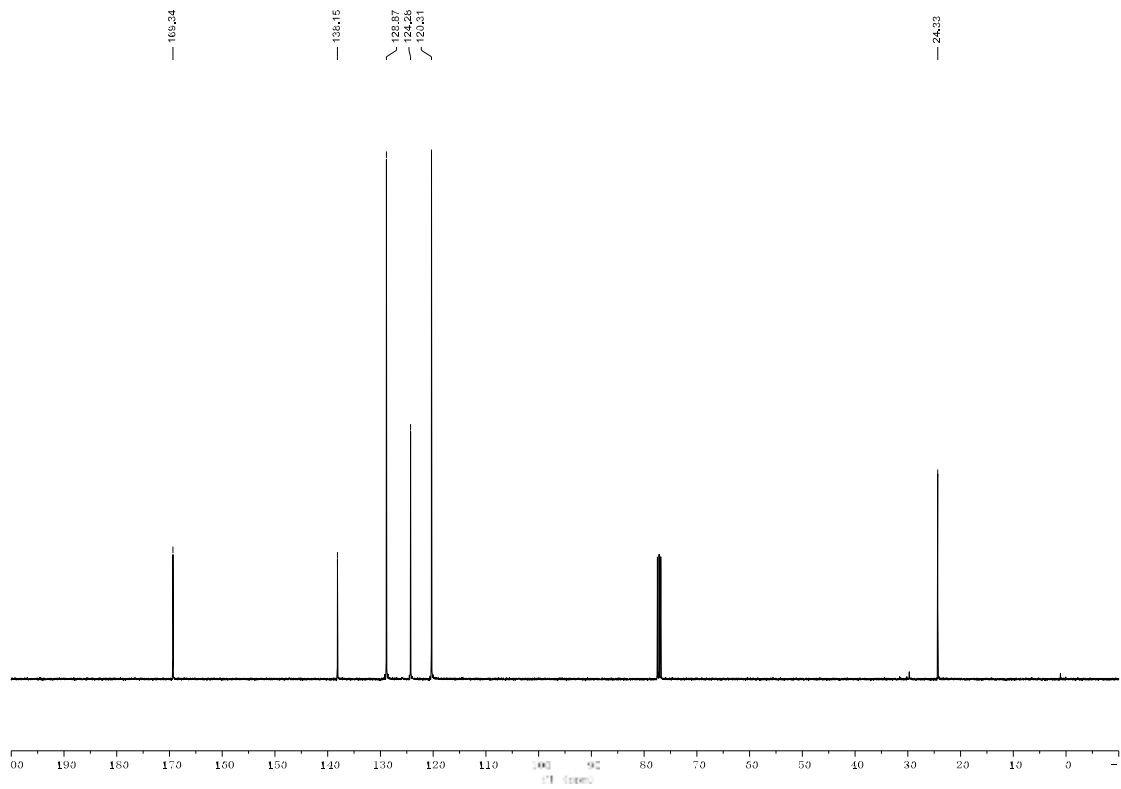



# <sup>1</sup>H NMR spectra for **5q**

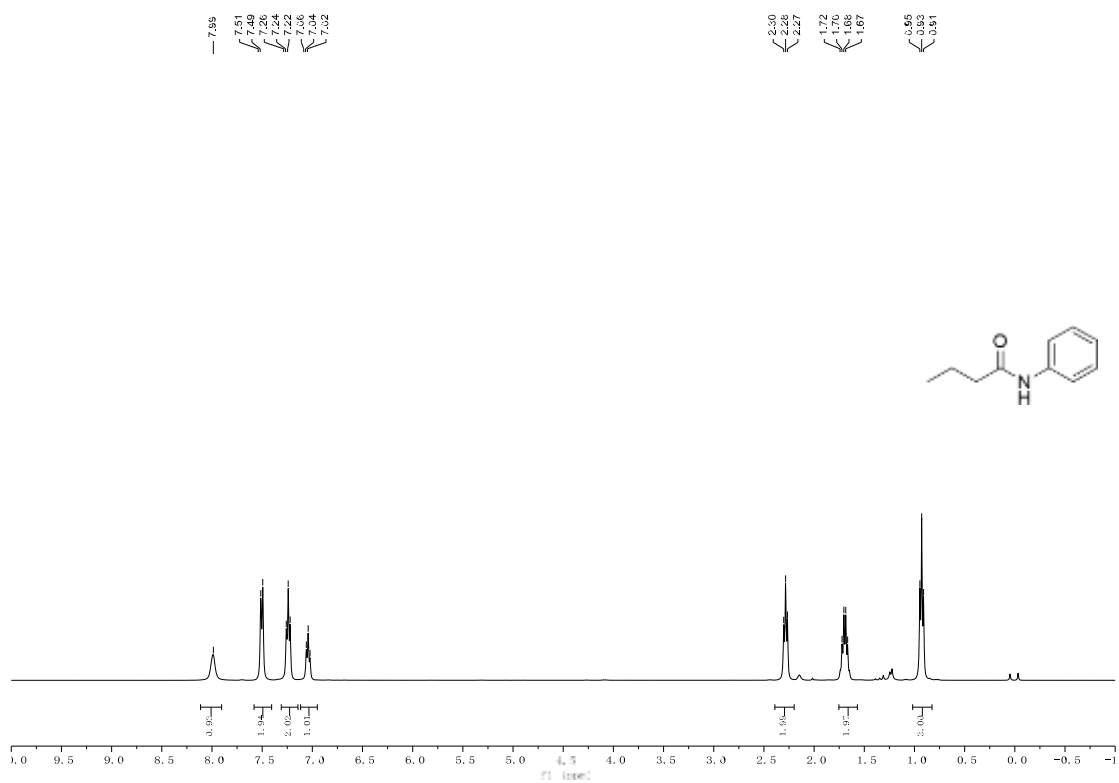

# <sup>13</sup>C NMR spectra for **5q**

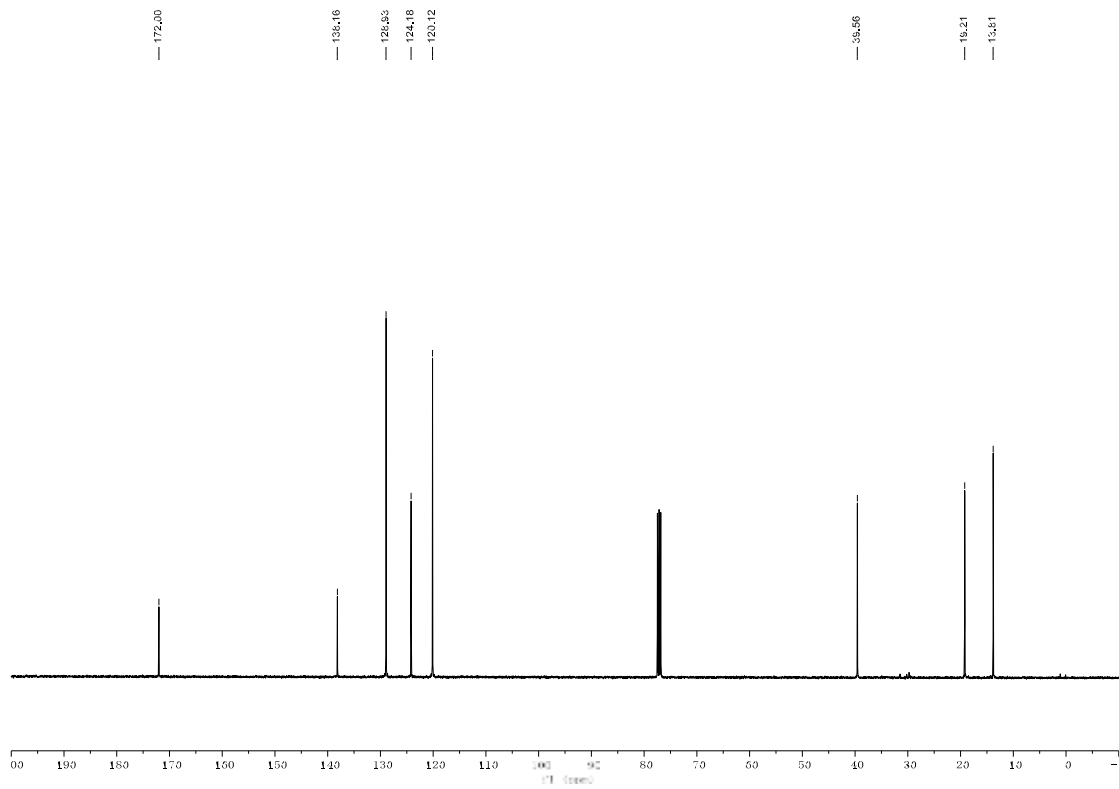

### $^1\text{H}$ NMR spectra for **5r**

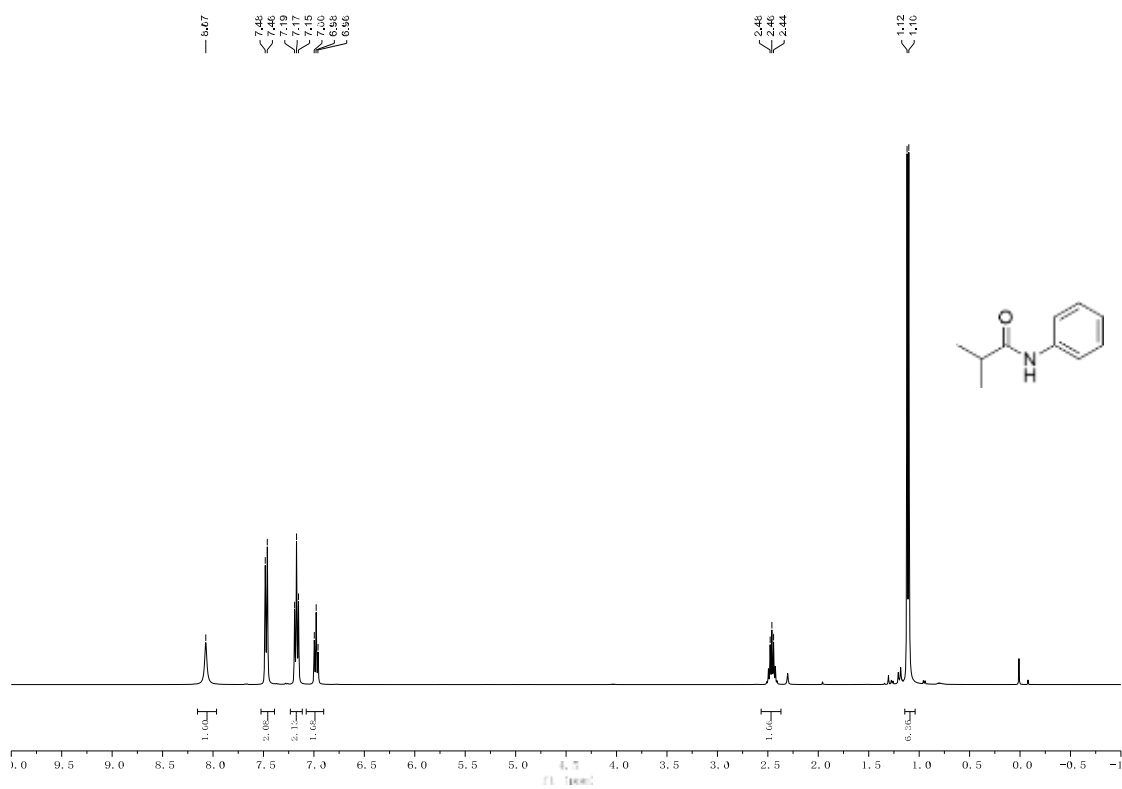

### $^{13}\text{C}$ NMR spectra for **5r**

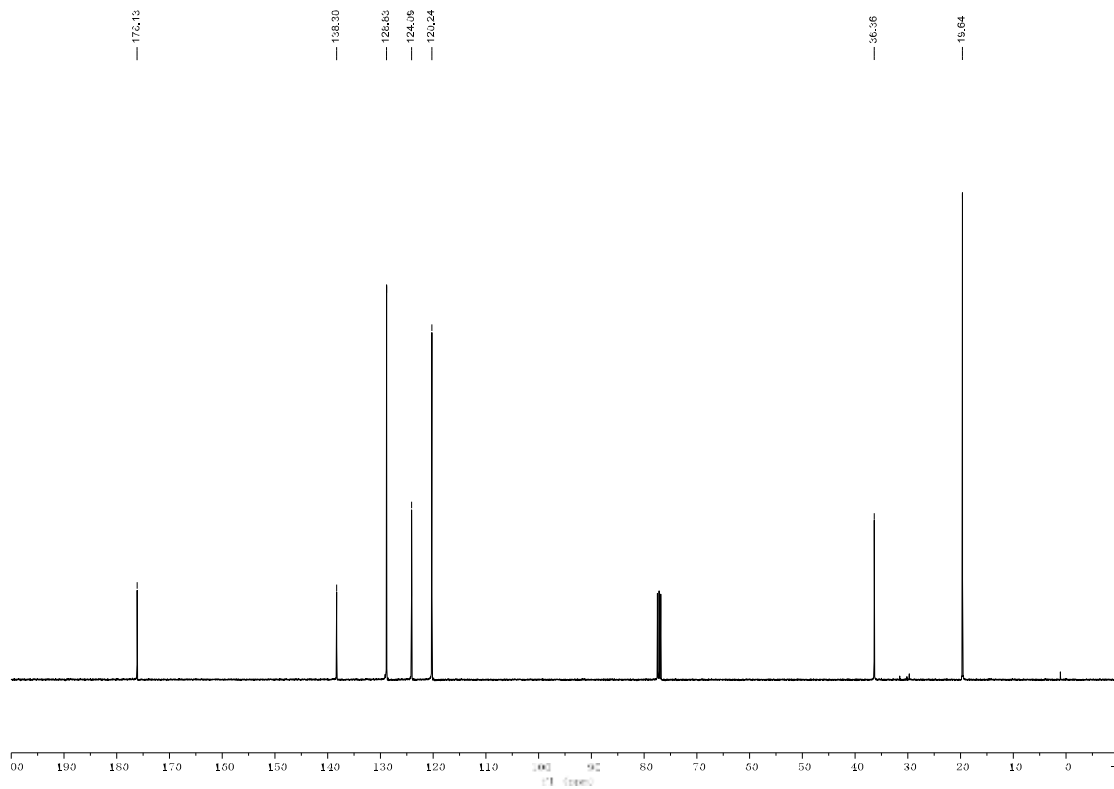

# <sup>1</sup>H NMR spectra for **5s**

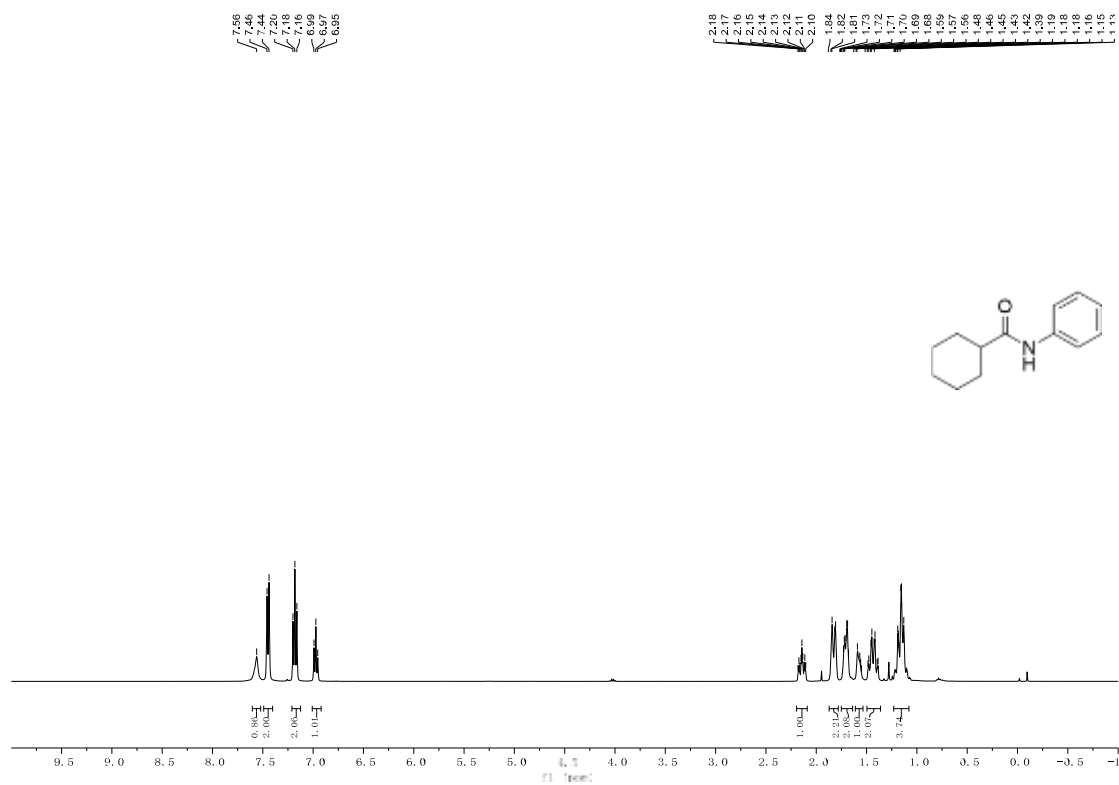

# <sup>13</sup>C NMR spectra for **5s**

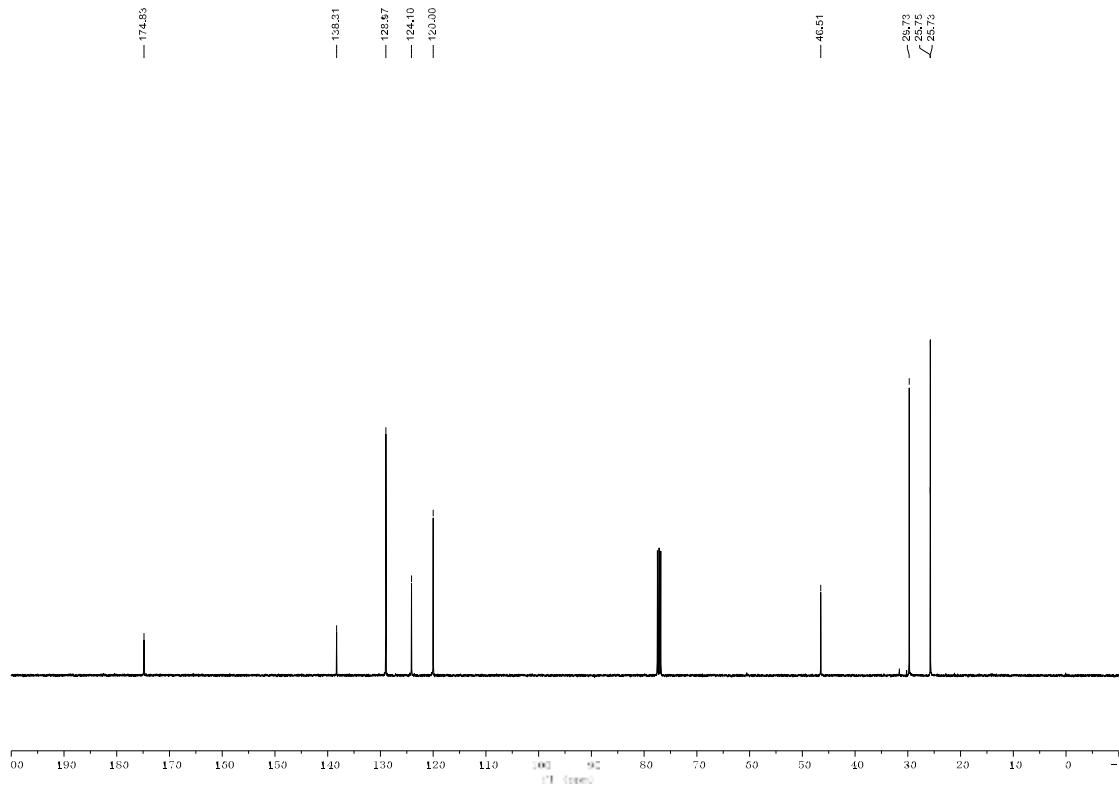

$^1\text{H}$  NMR spectra for **5t**

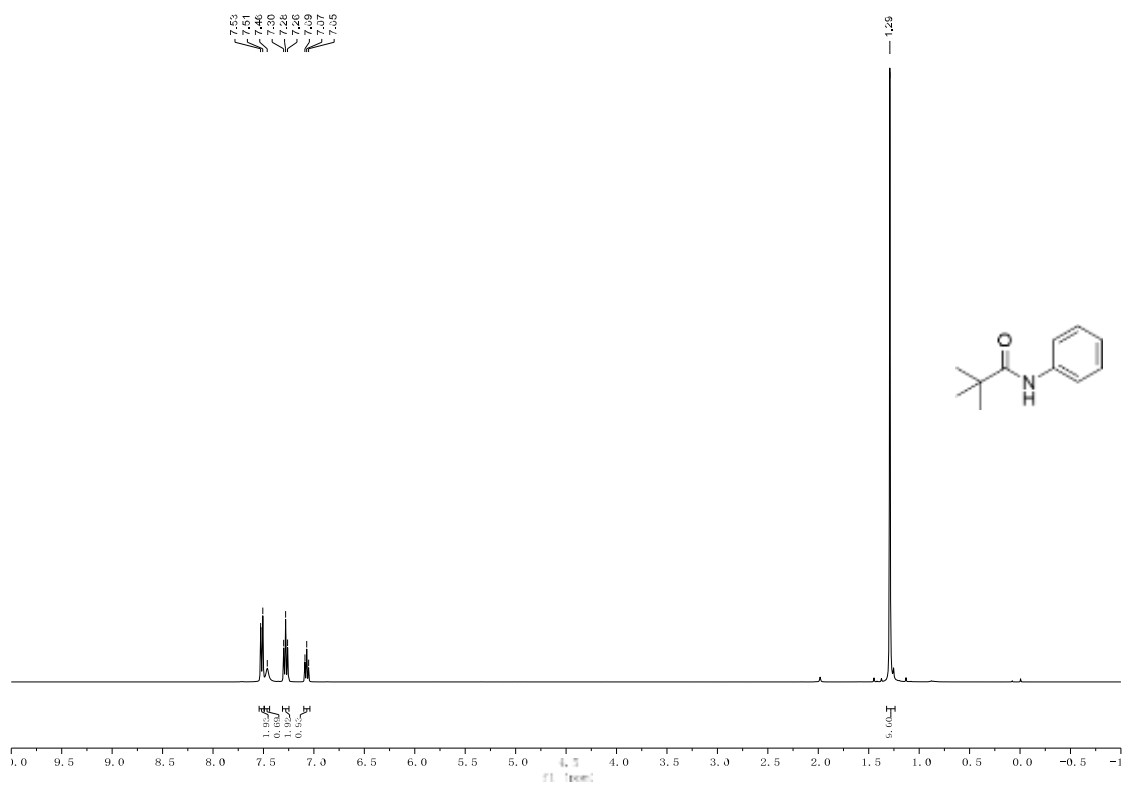

$^{13}\text{C}$  NMR spectra for **5t**

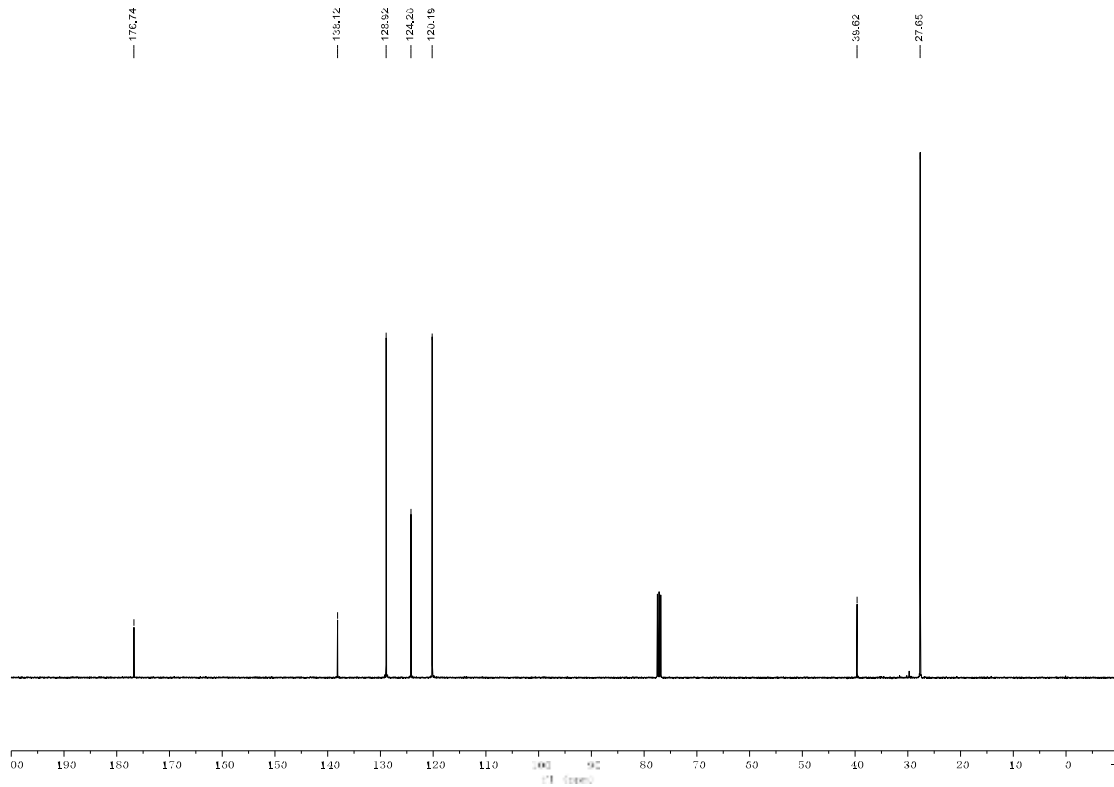

$^1\text{H}$  NMR spectra for **5u**

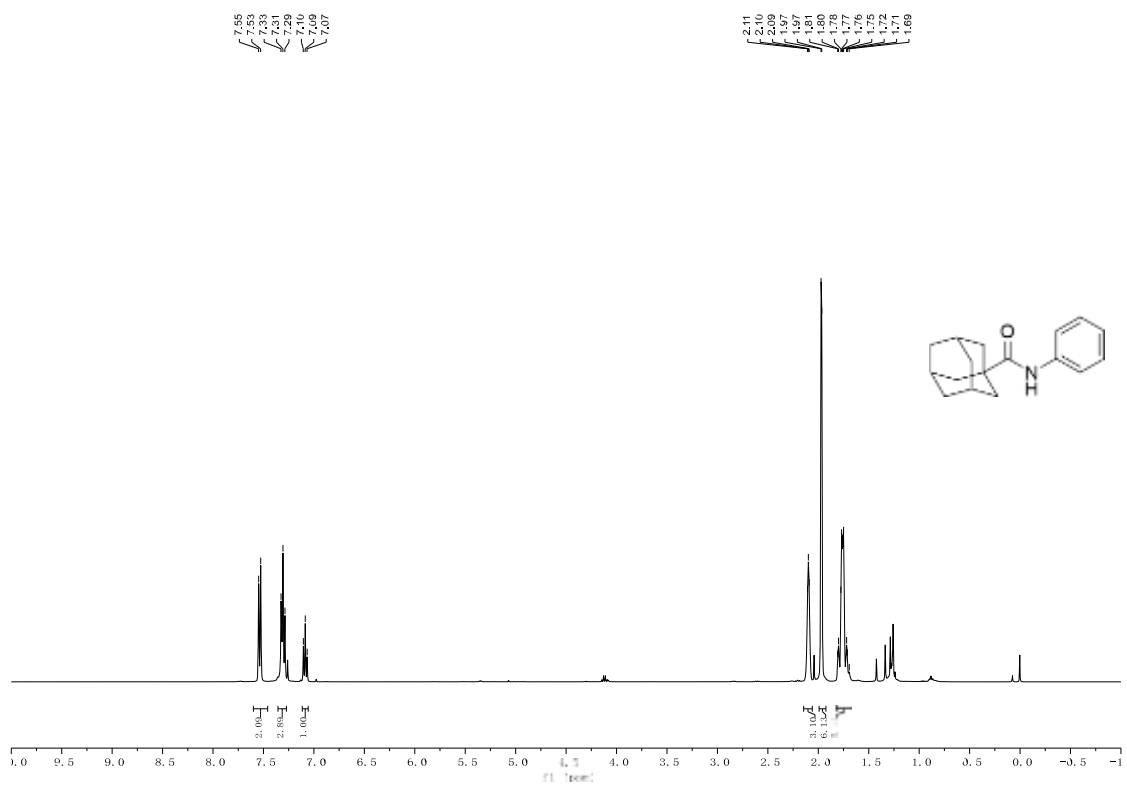

$^{13}\text{C}$  NMR spectra for **5u**

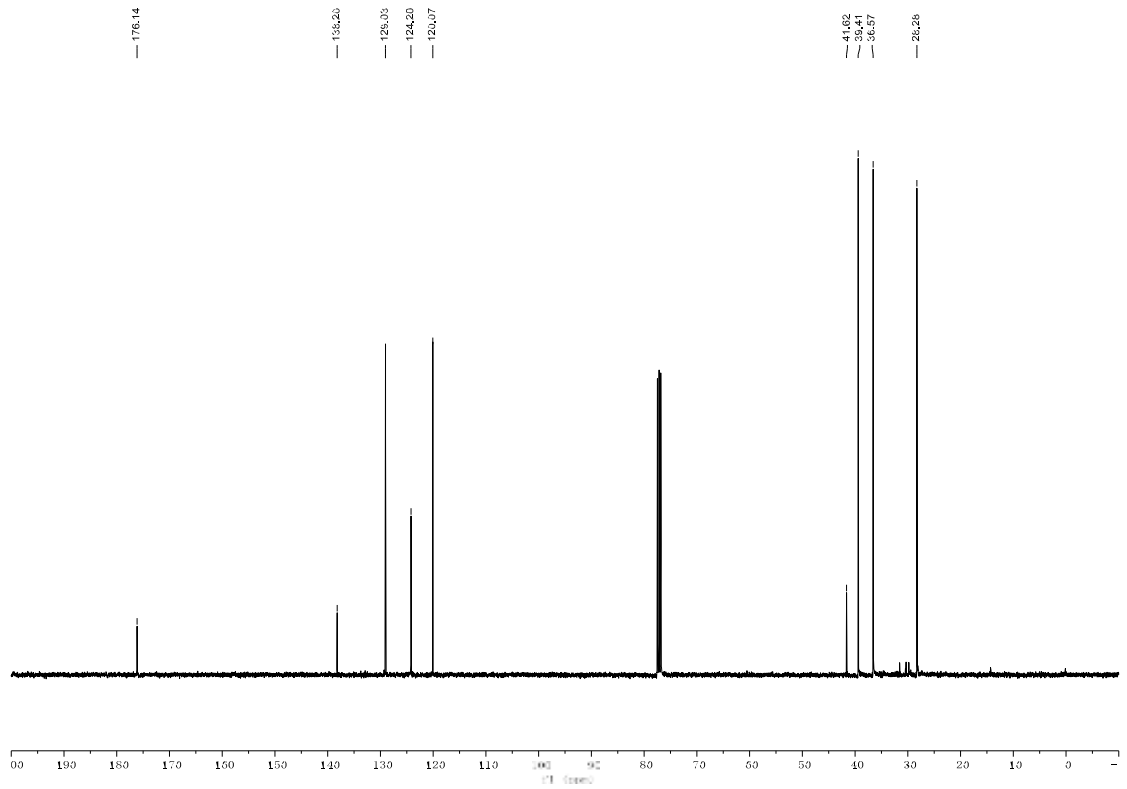

# <sup>1</sup>H NMR spectra for **5v**

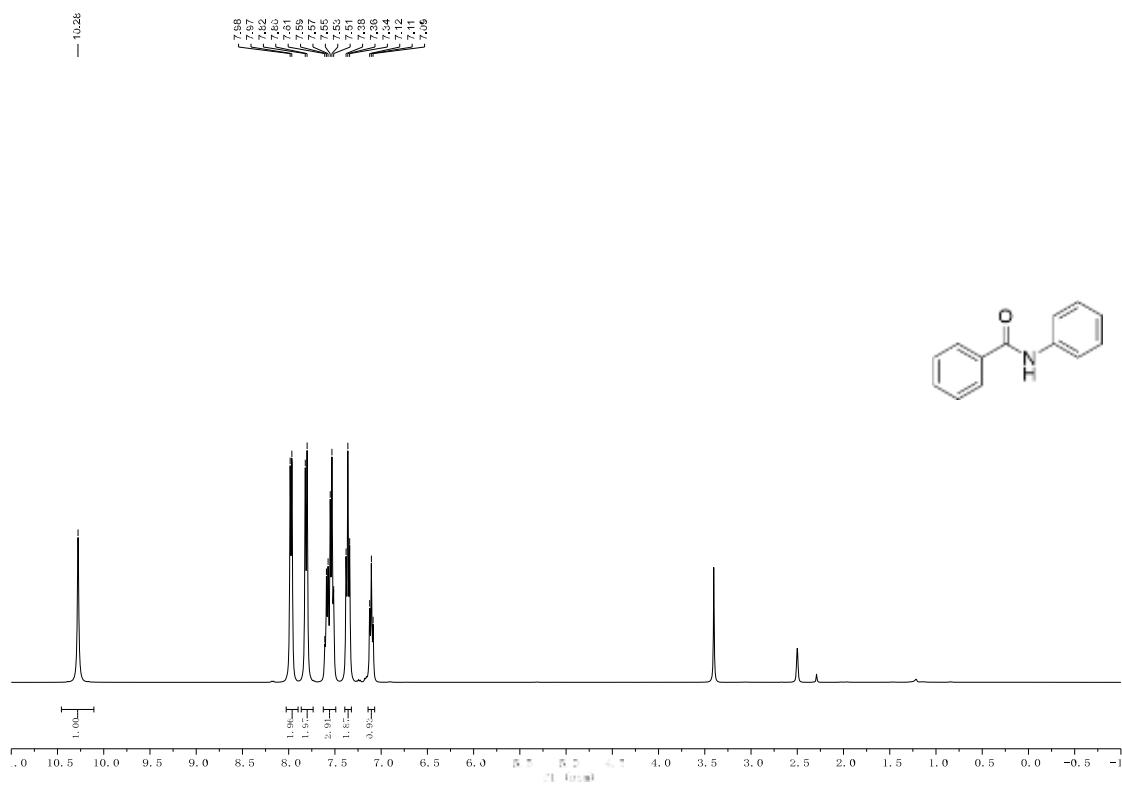

# <sup>13</sup>C NMR spectra for **5v**

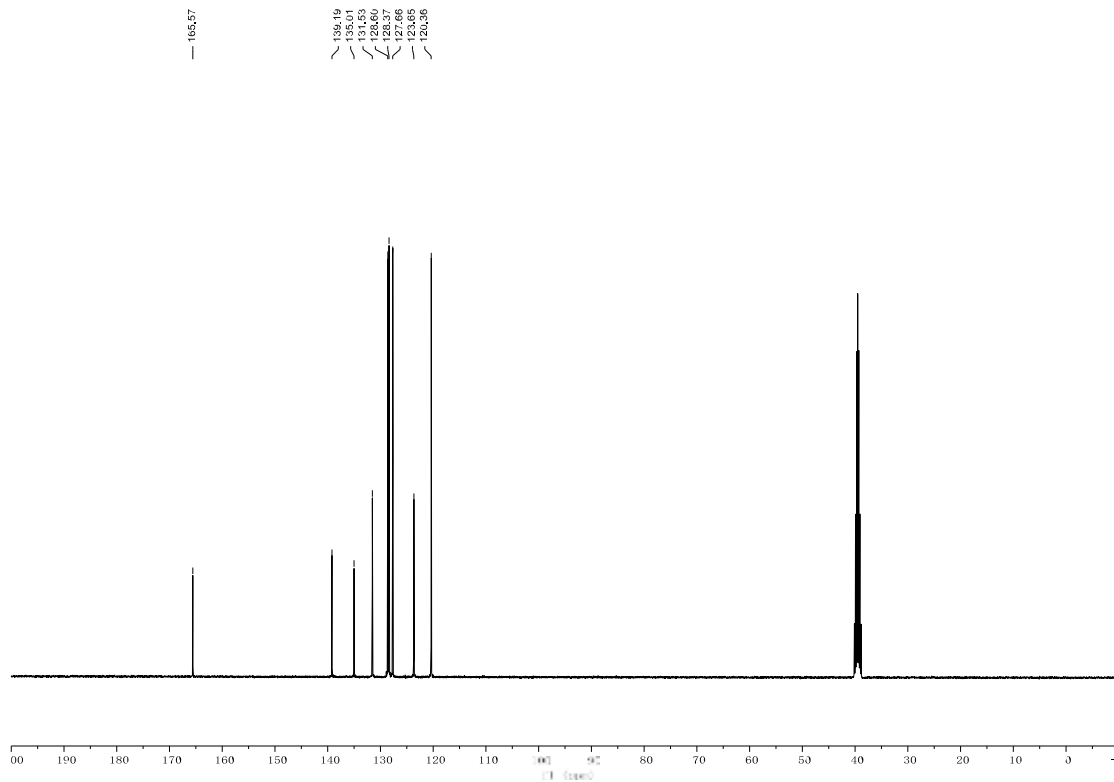

### $^1\text{H}$ NMR spectra for **5w**

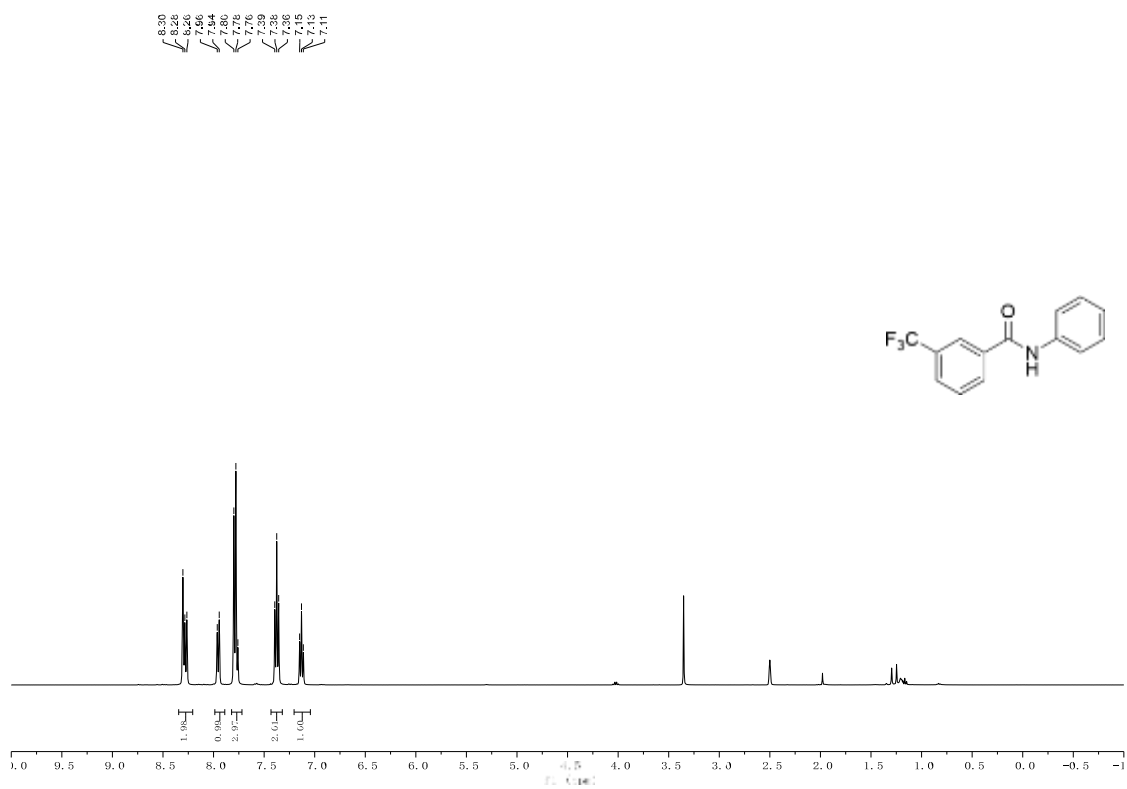

### $^{13}\text{C}$ NMR spectra for **5w**

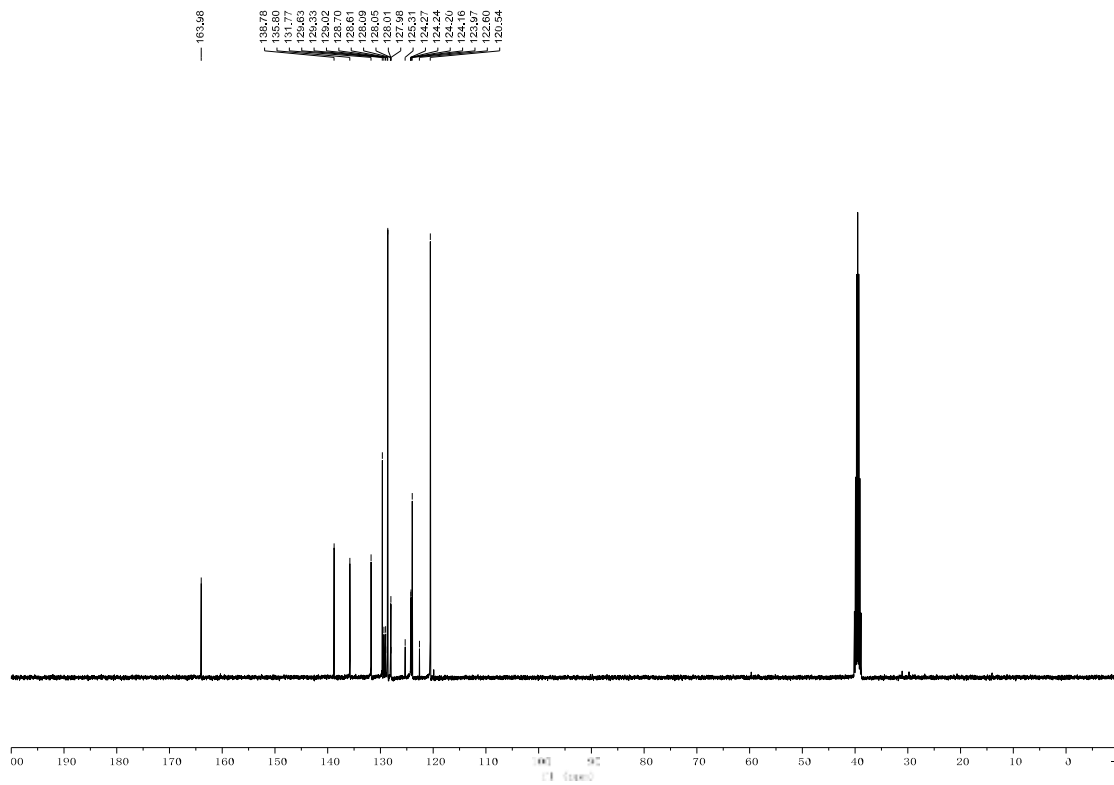

$^{19}\text{F}$  NMR spectra for **5w**

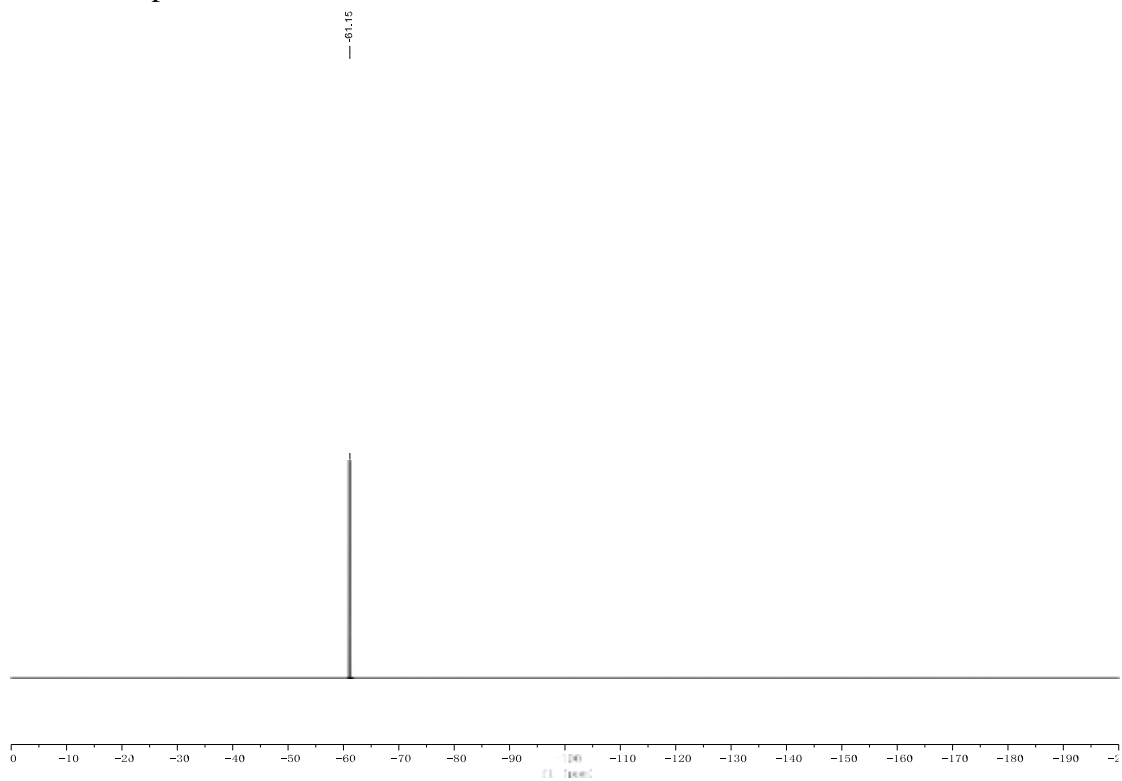

$^1\text{H}$  NMR spectra for **5x**

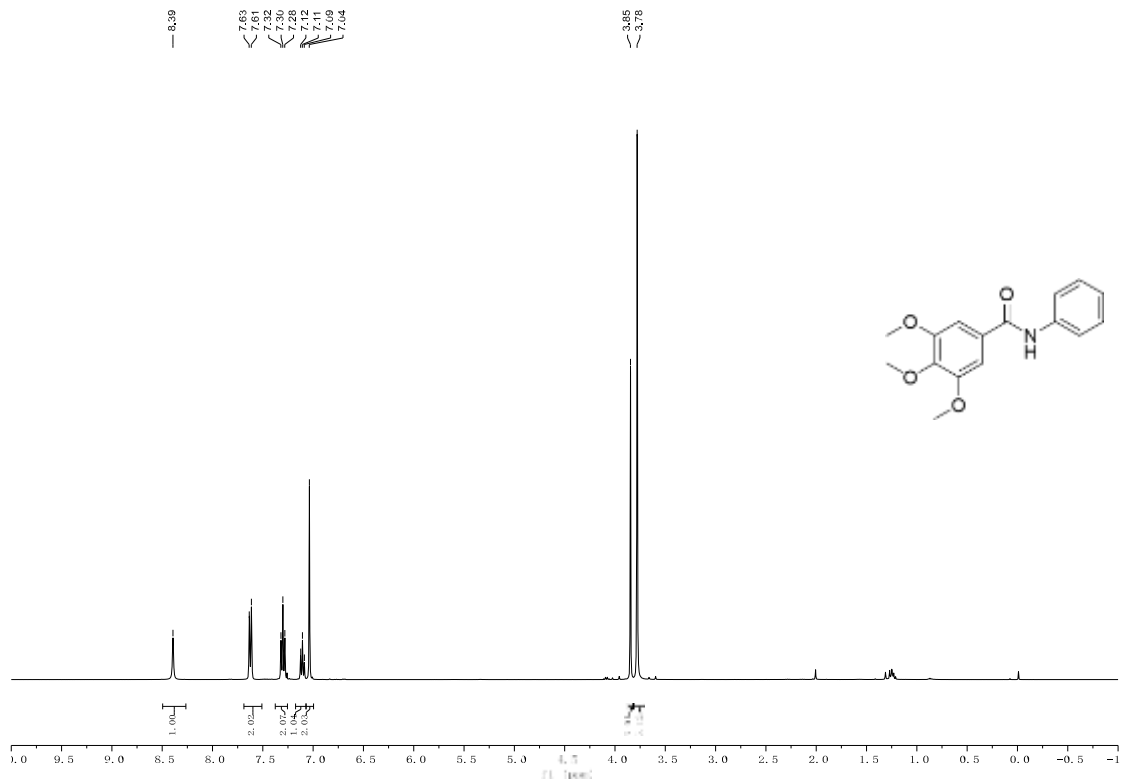





<sup>13</sup>C NMR spectra for **5y**

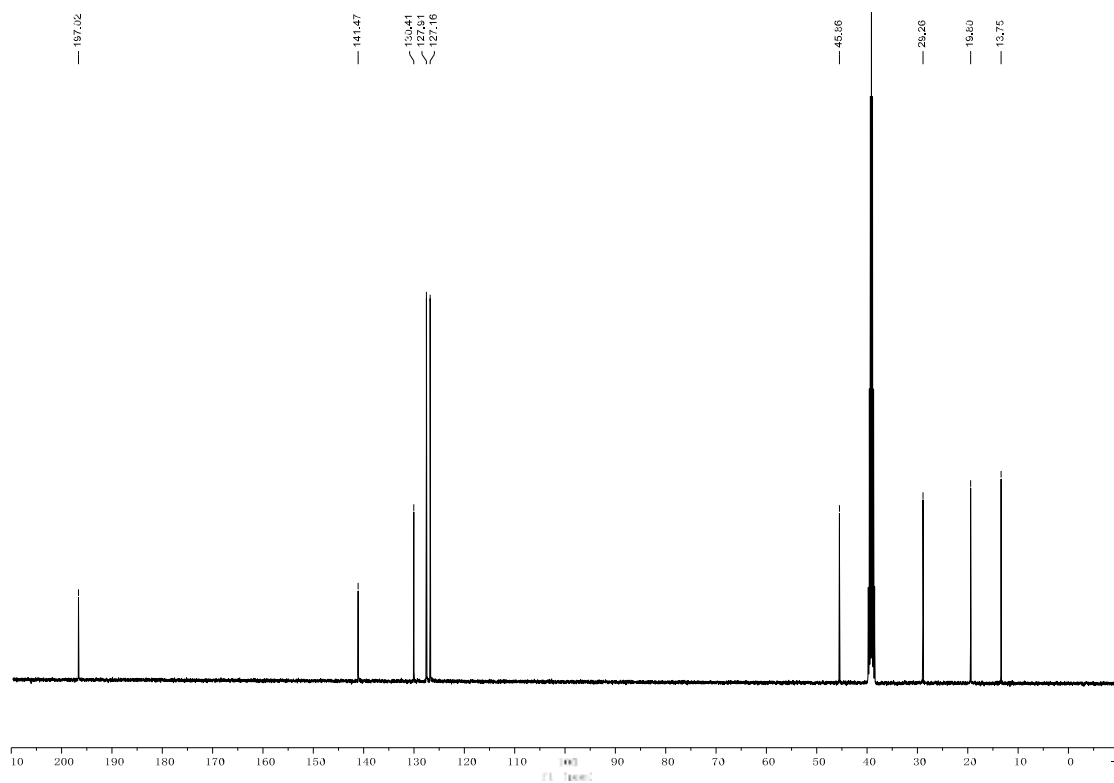

<sup>1</sup>H NMR spectra for **5z**

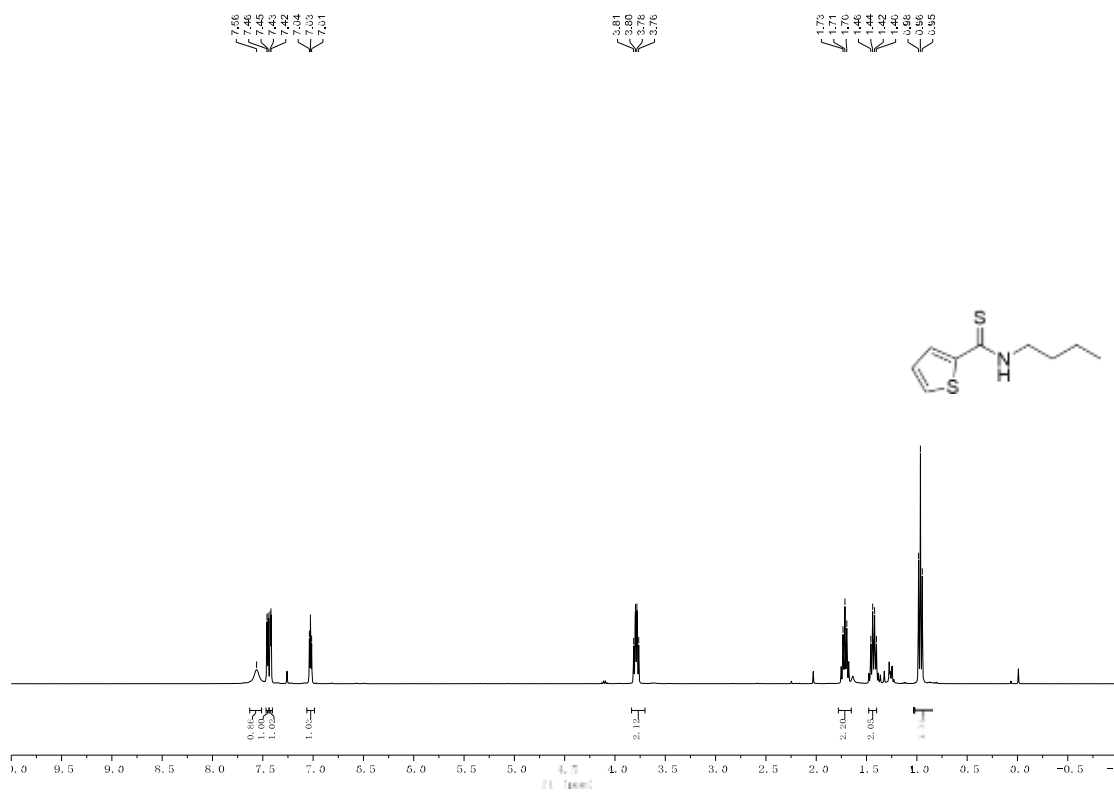

<sup>13</sup>C NMR spectra for **5z**

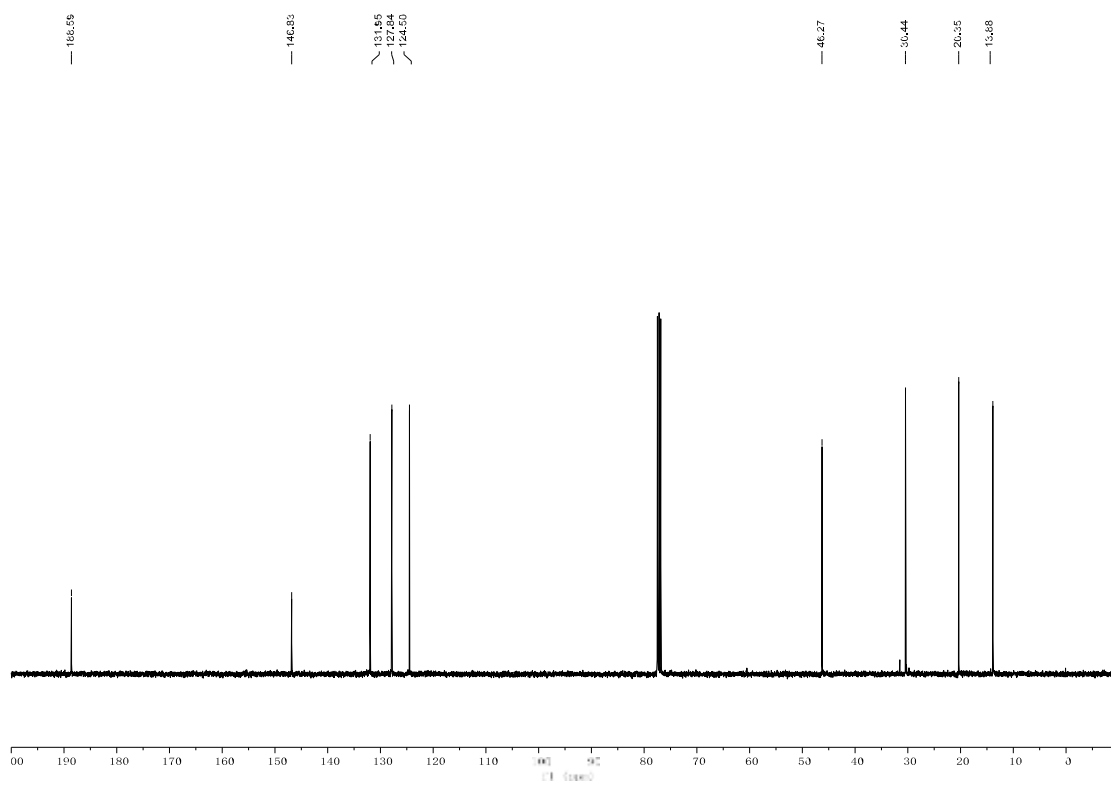

<sup>1</sup>H NMR spectra for **5aa**

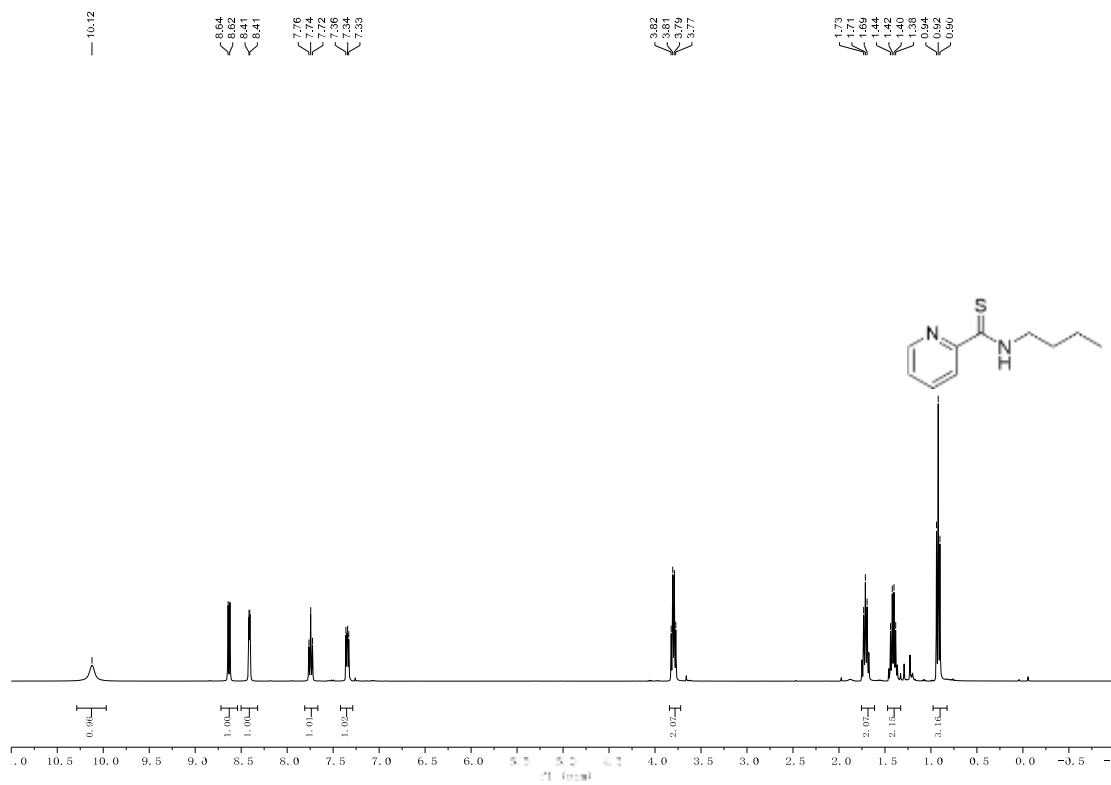

### <sup>13</sup>C NMR spectra for **5aa**

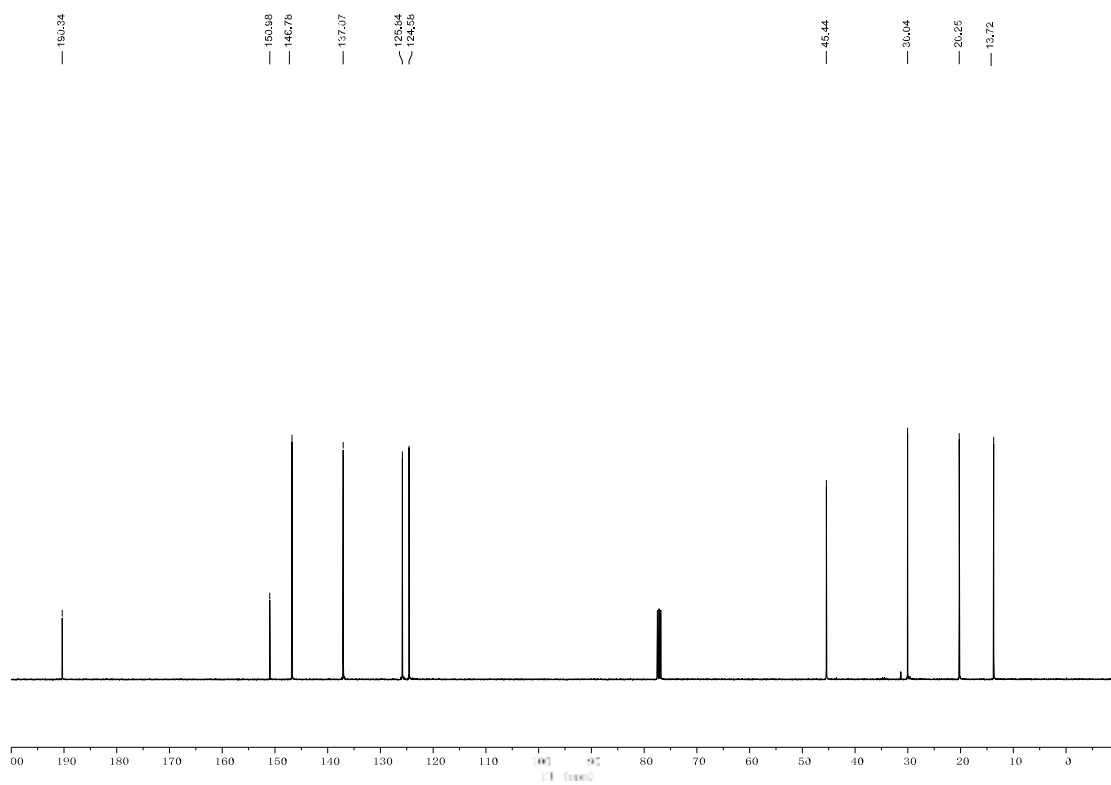

### <sup>1</sup>H NMR spectra for **5ab**

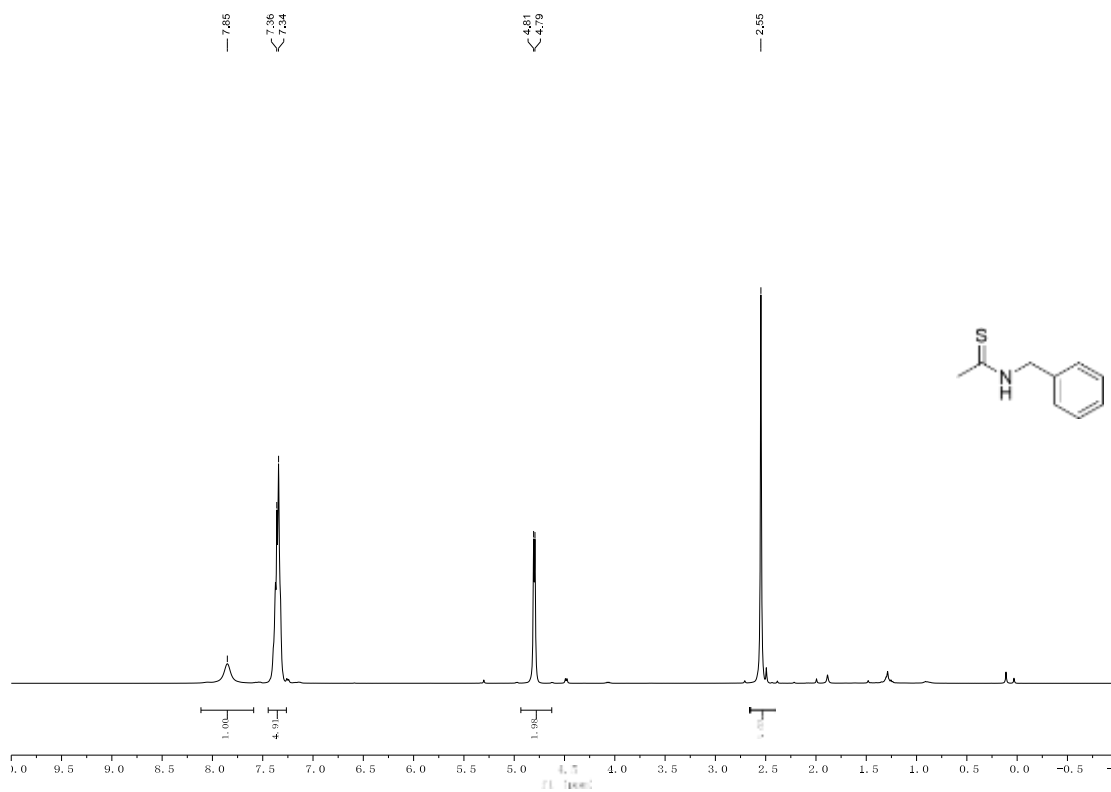

### $^{13}\text{C}$ NMR spectra for **5ab**

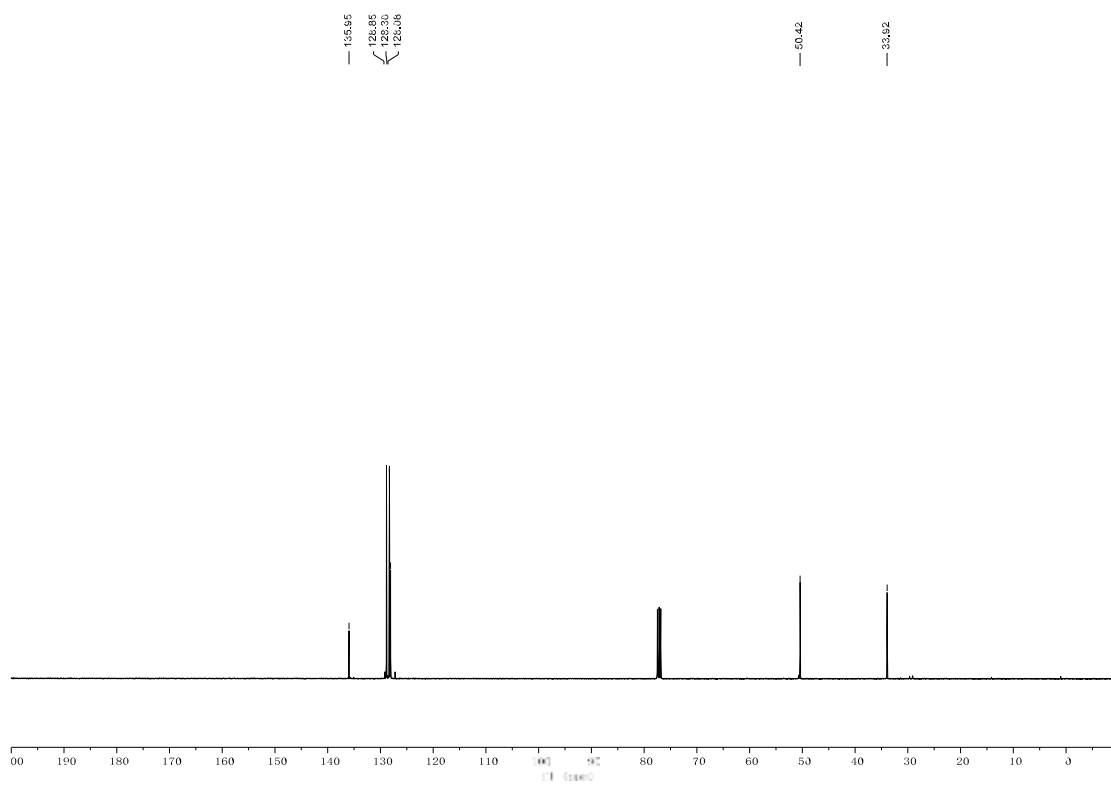

### $^1\text{H}$ NMR spectra for **5ac**

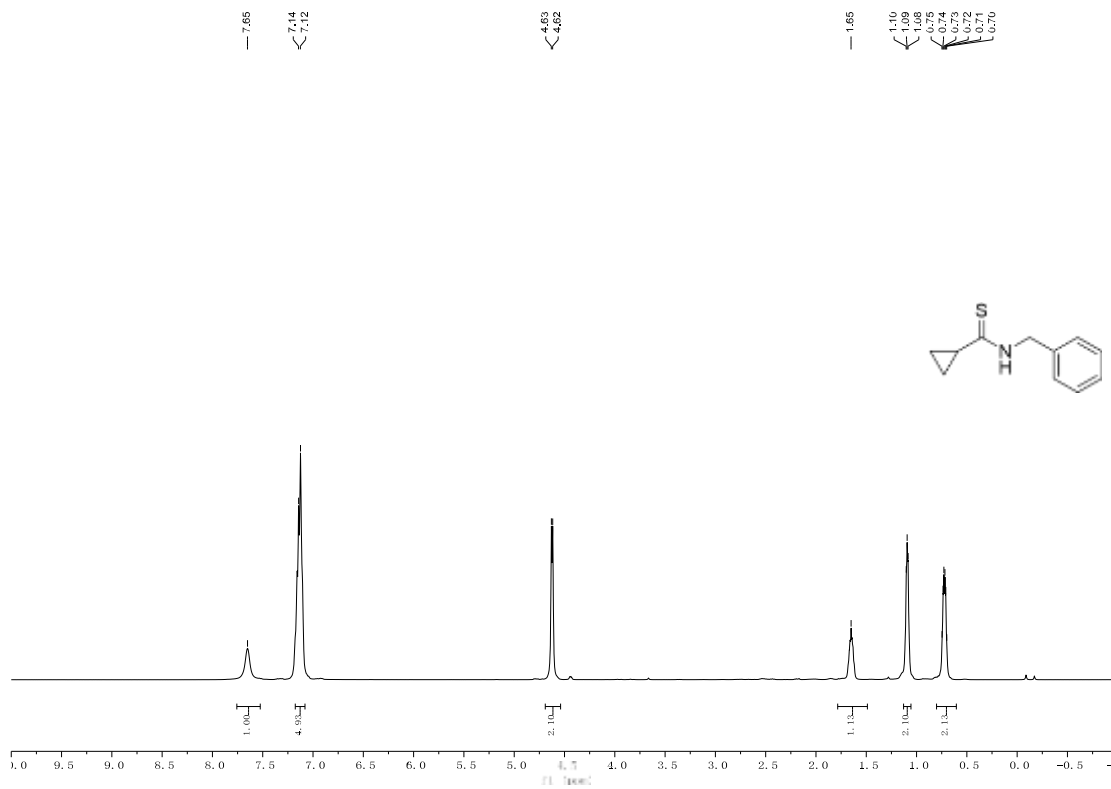

### <sup>13</sup>C NMR spectra for **5ac**

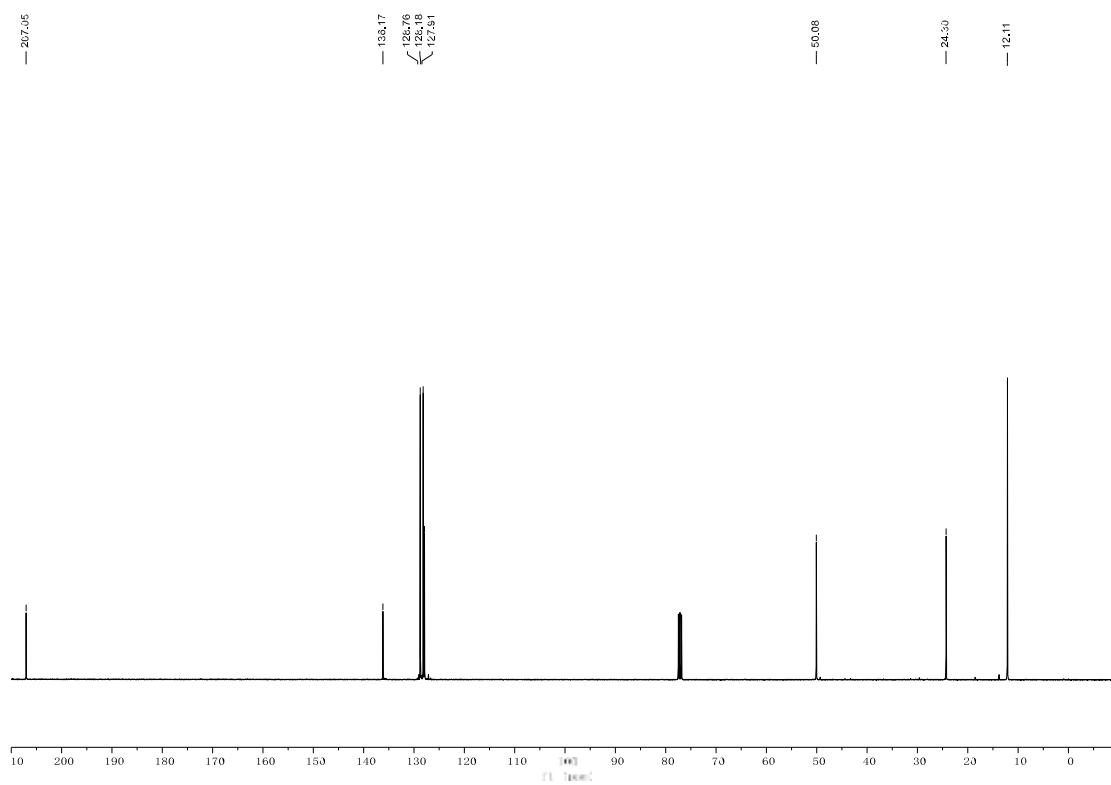

### <sup>1</sup>H NMR spectra for **Manefix**

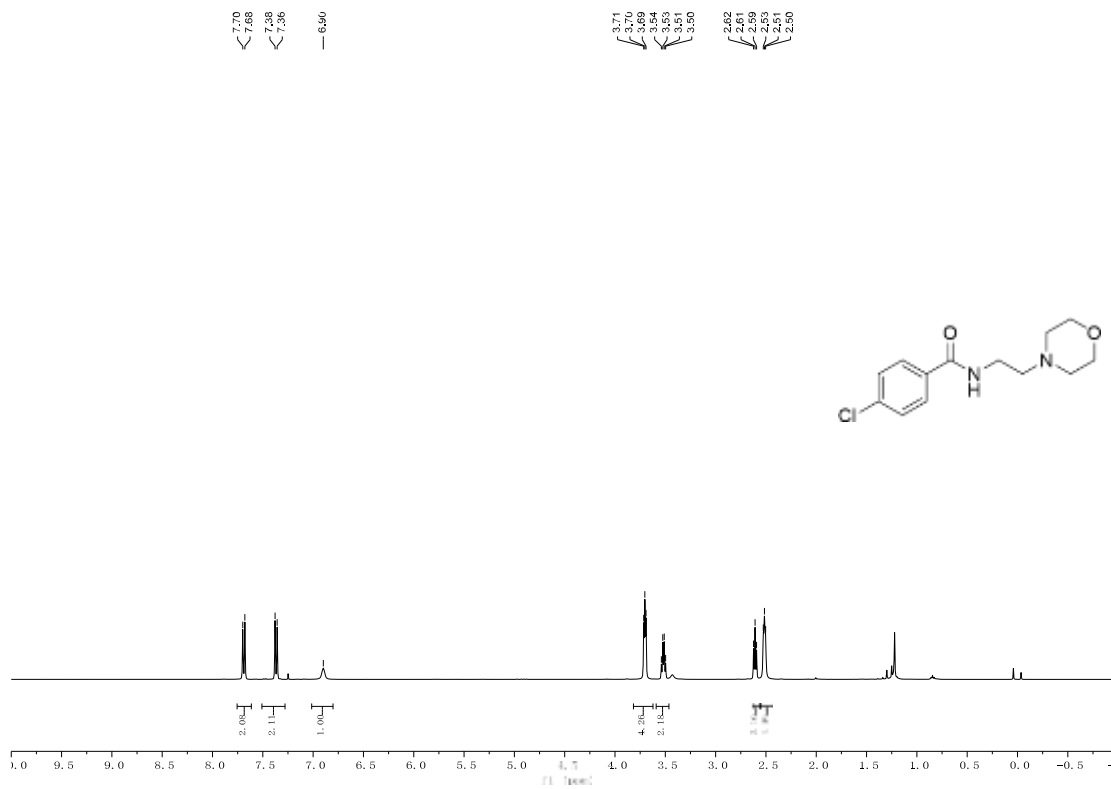

### <sup>13</sup>C NMR spectra for **Manefix**

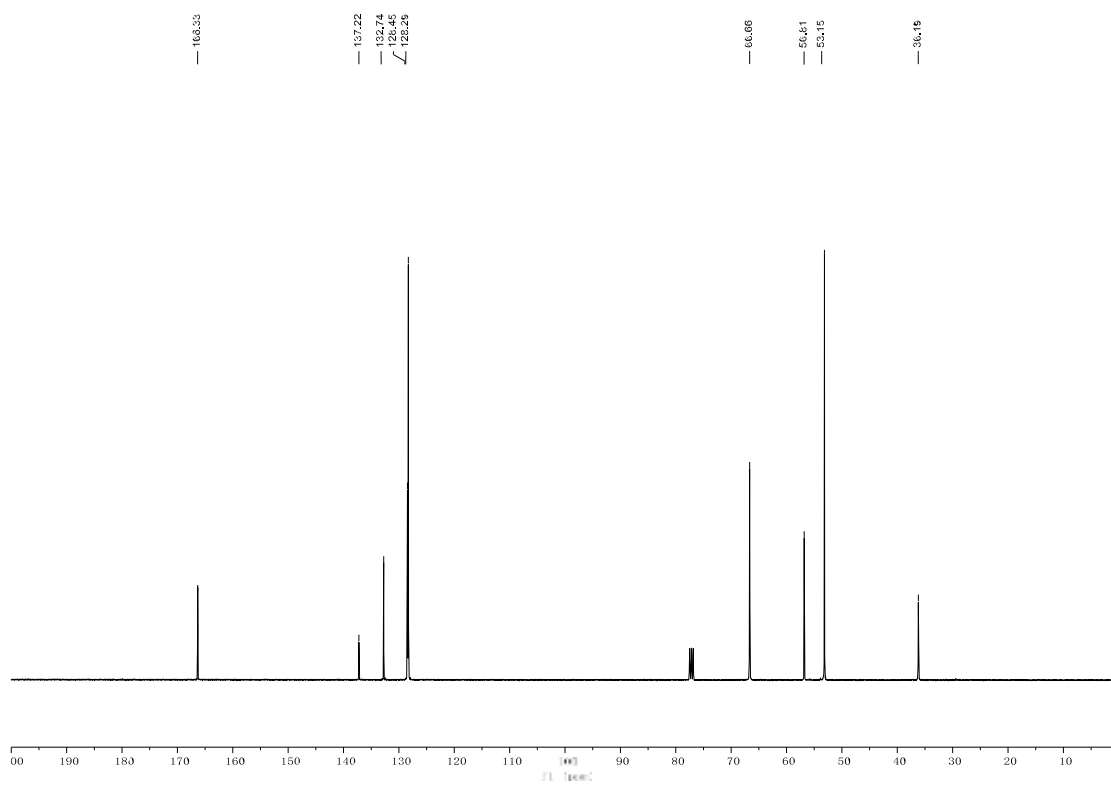

### <sup>1</sup>H NMR spectra for **Fasentin**

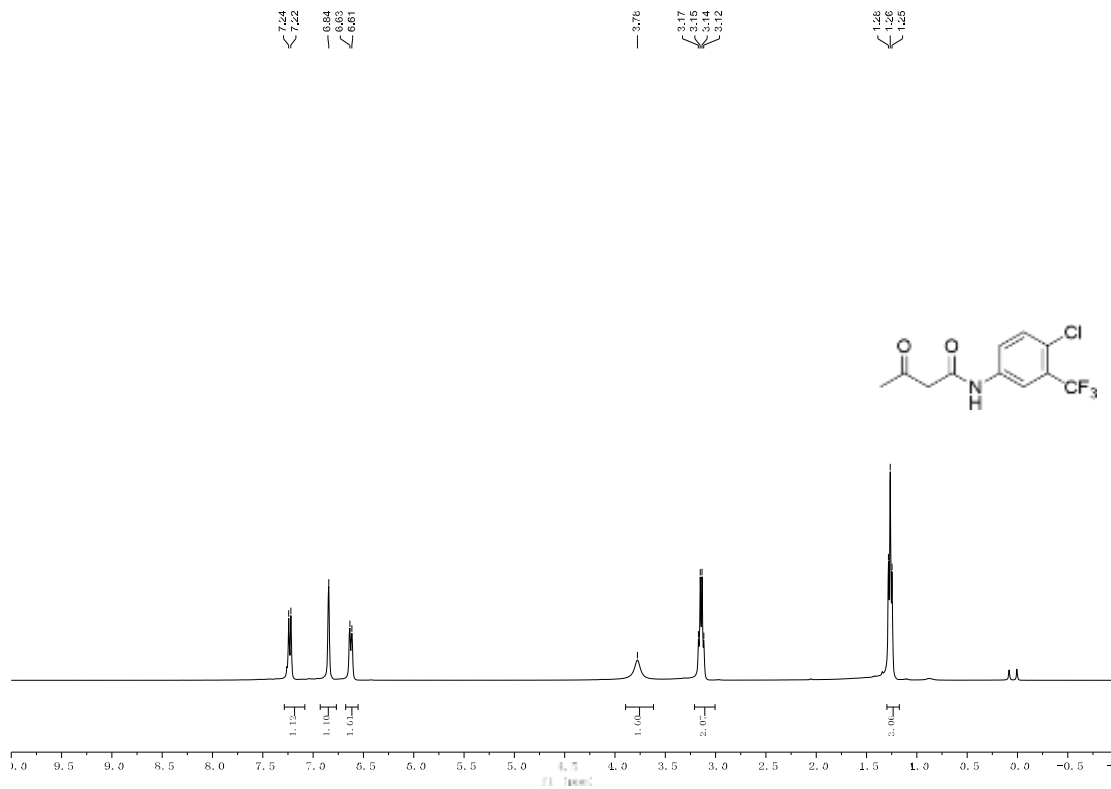

<sup>13</sup>C NMR spectra for **Fasentin**

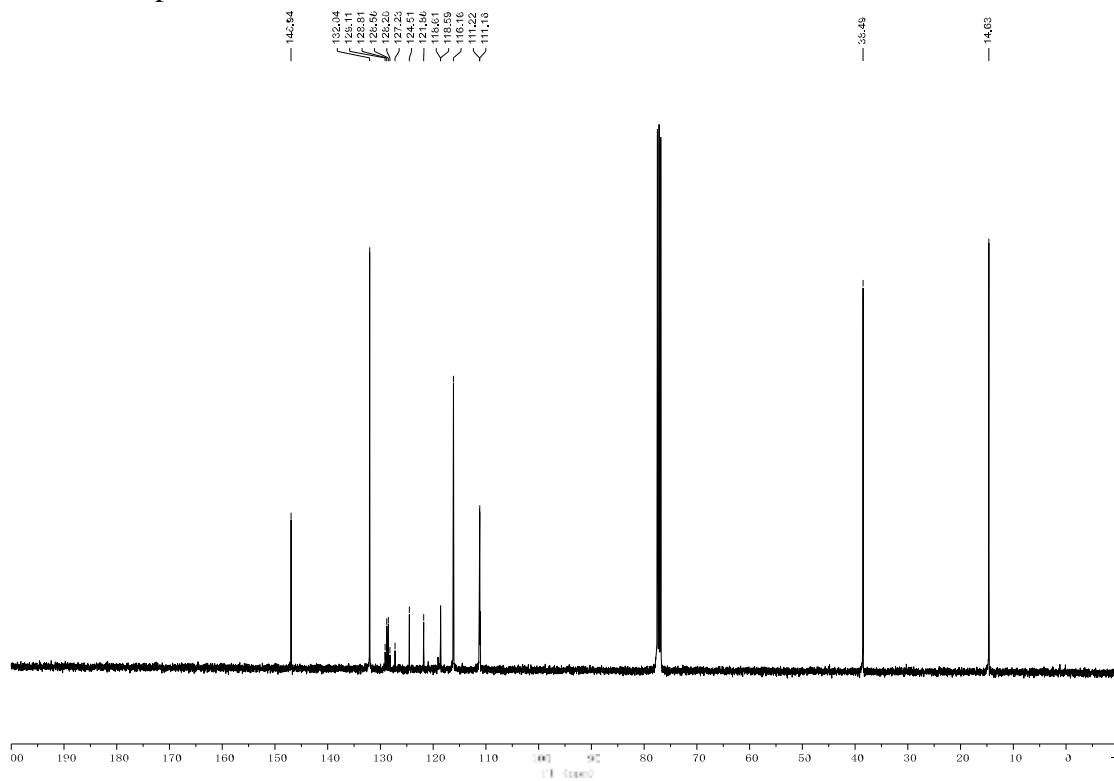

<sup>19</sup>F NMR spectra for **Fasentin**

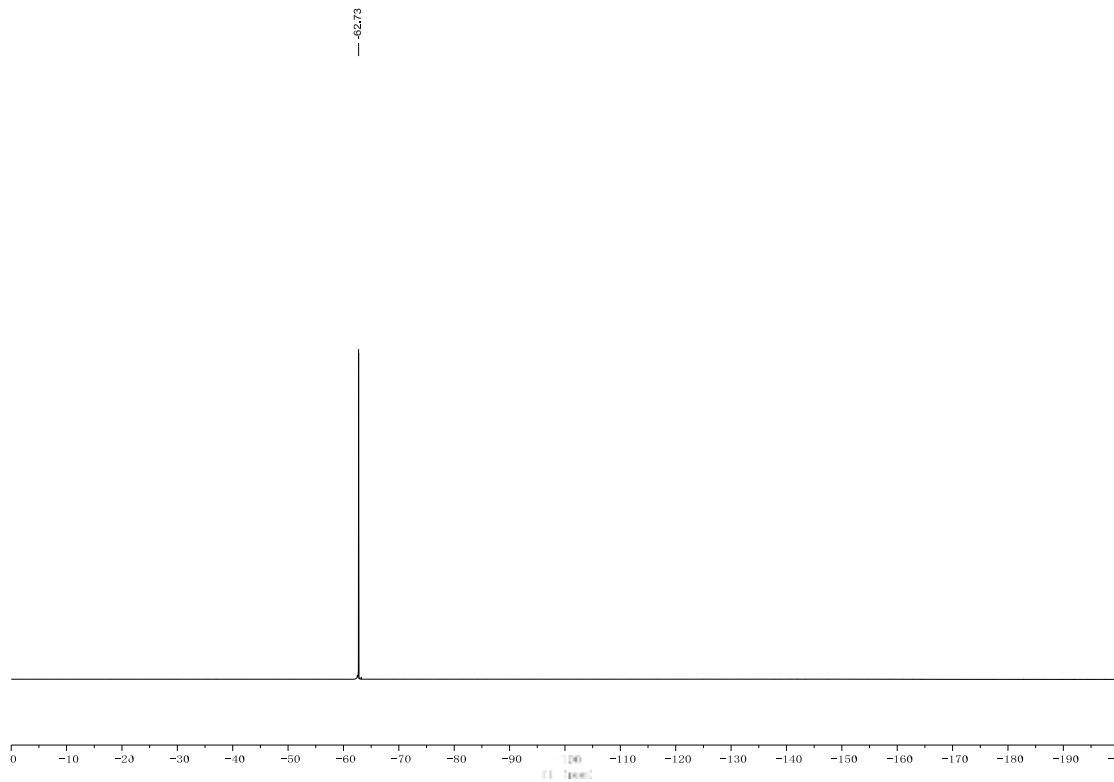



# <sup>1</sup>H NMR spectra for Tubulin inhibitor

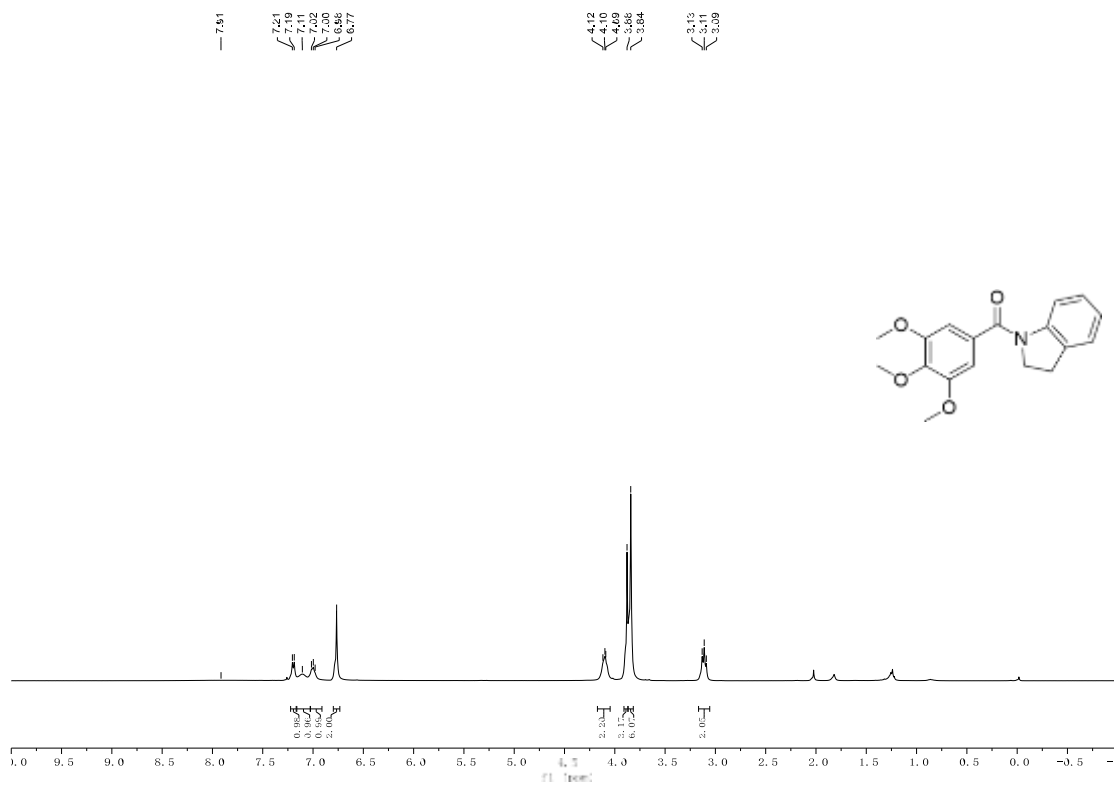

# <sup>13</sup>C NMR spectra for Tubulin inhibitor

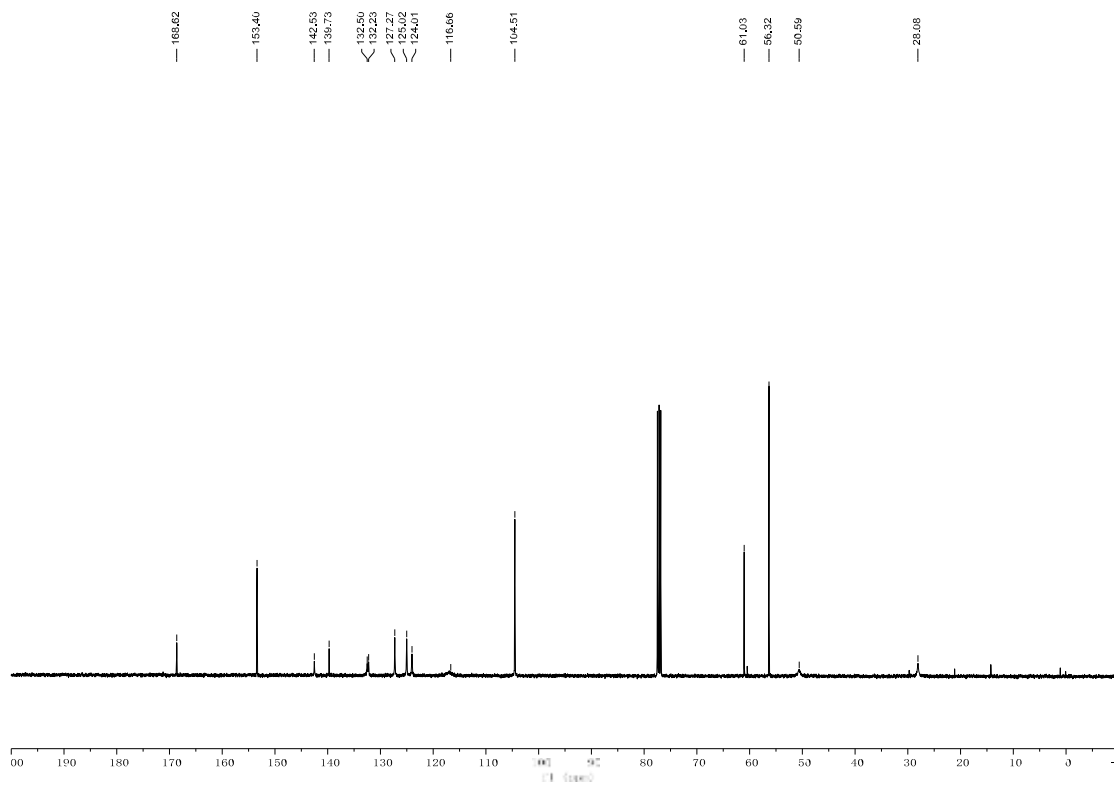

## 6. References

1. Zultanski S L, Zhao J, Stahl S S. Practical synthesis of amides via copper/ABNO-catalyzed aerobic oxidative coupling of alcohols and amines[J]. *Journal of the American Chemical Society*, **2016**, 138(20): 6416-6419.
2. Yu P, Wang Y, Zeng Z, et al. Metal-free C–N or C–C bond cleavages of  $\alpha$ -azido ketones: An oxidative-amidation strategy for the synthesis of  $\alpha$ -ketothioamides and amides[J]. *The Journal of Organic Chemistry*, **2019**, 84(22): 14883-14891.
3. Dankers C, Tadros J, Harman D G, et al. Immobilized Carbodiimide Assisted Flow Combinatorial Protocol to Facilitate Amide Coupling and Lactamization[J]. *ACS Combinatorial Science*, **2020**, 22(5): 255-267.
4. Zhang R, Yao W Z, Qian L, et al. A practical and sustainable protocol for direct amidation of unactivated esters under transition-metal-free and solvent-free conditions[J]. *Green Chemistry*, **2021**, 23(11): 3972-3982.
5. Arisawa M, Yamaguchi M. Rhodium-catalyzed Beckmann rearrangement[J]. *Organic letters*, **2001**, 3(2): 311-312.
6. Sharma N, Sekar G. Stable and Reusable Binaphthyl-Supported Palladium Catalyst for Aminocarbonylation of Aryl Iodides[J]. *Advanced Synthesis & Catalysis*, **2016**, 358(2): 314-320.
7. Vinayak B, Chandrasekharam M. Copper-Catalyzed Direct Nitration on Aryl C–H Bonds by Concomitant Azidation–Oxidation with TMS Azide and TBHP under Aerobic Conditions[J]. *Organic letters*, **2017**, 19(13): 3528-3531.
8. Lei P, Wang Y, Mu Y, et al. Green-Solvent Selection for Acyl Buchwald–Hartwig Cross-Coupling of Amides (Transamidation)[J]. *ACS Sustainable Chemistry & Engineering*, **2021**, 9(44): 14937-14945.
9. Kim S, Kim S H, Ko H J, et al. Solution-Phase Synthesis of a Library of Biaryl Amides Using Girard' s reagent T as an Acid Chloride Scavenger[J]. *대한약학회 학술대회*, **2002**: 3412-3412.
10. Zheng D Z, Xiong H G, Song A X, et al. Buchwald–Hartwig amination of aryl esters and chlorides catalyzed by the dianisole-decorated Pd–NHC complex[J]. *Organic & Biomolecular Chemistry*, **2022**, 20(10): 2096-2101.
11. Wang X, Liu J, An G. Green synthetic method of N-arylamides using recyclable cheap metal catalyst[J]. *Tetrahedron Letters*, **2020**, 61(43): 152327.
12. Yamasaki R, Harada M, Nagata R, et al. Conformational switch of benzanilide derivative induced by acid; effect of pentafluorobenzoyl group[J]. *The Journal of Organic Chemistry*, **2022**, 87(13): 8469-8479.
13. Liu C, Chen H N, Xiao T F, et al. Organic photoredox catalyzed dealkylation/acylation of tertiary amines to access amides[J]. *Chemical Communications*, **2023**, 59(14): 2003-2006.
14. Song G, Sun G, Tang Y, et al. The n Bu<sub>4</sub>NI Catalysed Oxidative Benzoic Acid Amide Formation from Aryl Acetaldehydes and Amines in Aqueous Solution[J]. *Journal of Chemical Research*, **2013**, 37(10): 630-632.
15. Crabb T A, Soilleux S L. Microbiological transformations, part 6. Microbiological transformations of acyl derivatives of indoline, 1, 2, 3, 4-tetrahydroquinoline, 1, 2, 3, 4-tetrahydroisoquinoline and 2, 3, 4, 5-tetrahydro-1 H-1-benzazepine with the fungus *Cunninghamella elegans*[J]. *Journal of the Chemical Society, Perkin Transactions 1*, **1985**: 1381-1385.
16. Santiago A J G, Brown C A, Sommer R D, et al. Identification of key functionalization species in the Cp\* Ir (III)-catalyzed-ortho halogenation of benzamides[J]. *Dalton Transactions*, **2020**, 49(45): 16166-16174.

17. Huang J, Sun F, Liu W. Manganese-catalyzed deoxygenation of secondary and tertiary amides under mild conditions[J]. *Journal of Catalysis*, 2023, 423: 19-25.
18. Park J K, Shin W K, An D K. New and Efficient Synthesis of Amides from Acid Chlorides Using Diisobutyl (amino) aluminum[J]. *Bull. Korean Chem. Soc*, 2013, 34(5): 1592-1594.
19. Serra J, Parella T, Ribas X. Au (III)-aryl intermediates in oxidant-free C–N and C–O cross-coupling catalysis[J]. *Chemical science*, **2017**, 8(2): 946-952.
20. Correa A, Elmore S, Bolm C. Iron-Catalyzed N-Arylations of Amides[J]. *Chemistry–A European Journal*, **2008**, 14(12): 3527-3529.
21. Barragan E, Noonikara-Poyil A, Bugarin A.  $\pi$ -Conjugated Triazenes and Nitriles: Simple Photoinduced Synthesis of Anilides Using Mild and Metal-Free Conditions[J]. *Asian Journal of Organic Chemistry*, **2020**, 9(4): 593-599.
22. Sweet J S, Wang R, Manesiotis P, et al. Atropselective synthesis of N-aryl pyridones via dynamic kinetic resolution enabled by non-covalent interactions[J]. *Organic & Biomolecular Chemistry*, **2022**, 20(12): 2392-2396.
23. Hodgkinson J T, Galloway W R J D, Wright M, et al. Design, synthesis and biological evaluation of non-natural modulators of quorum sensing in *Pseudomonas aeruginosa*[J]. *Organic & Biomolecular Chemistry*, **2012**, 10(30): 6032-6044.
24. Wang L, Lu C, Yue Y, et al. Visible-light-promoted oxo-sulfonylation of ynamides with sulfonic acids[J]. *Organic letters*, **2019**, 21(10): 3514-3517.
25. Schoepf A M, Salcher S, Obexer P, et al. Overcoming imatinib resistance in chronic myelogenous leukemia cells using non-cytotoxic cell death modulators[J]. *European Journal of Medicinal Chemistry*, **2020**, 185: 111748.
26. Vijayasankar A V, Kathyayini H, Tumma H, et al. Mesoporous Iron Aluminophosphate: An Efficient Catalyst for One Pot Synthesis of Amides by Ester-Amide Exchange Reaction[J]. *Advances in Inorganic Phosphate Materials: Ceramic Transactions*, **2012**, 233: 127-140.
27. Maj A, Kudelko A, Świątkowski M. Novel Conjugated s-Tetrazine Derivatives Bearing a 4 H-1, 2, 4-Triazole Scaffold: Synthesis and Luminescent Properties[J]. *Molecules*, **2022**, 27(2): 459.
28. Silva R H N, Machado T Q, da Fonseca A C C, et al. Molecular Modeling and In Vitro Evaluation of Piplartine Analogs against Oral Squamous Cell Carcinoma[J]. *Molecules*, **2023**, 28(4): 1675.
29. Chen H, Xu X, Liu L L, et al. Phosphorus oxychloride as an efficient coupling reagent for the synthesis of esters, amides and peptides under mild conditions[J]. *RSC advances*, **2013**, 3(37): 16247-16250.
30. Mamidi N, Manna D. Zn (OTf)<sub>2</sub>-promoted chemoselective esterification of hydroxyl group bearing carboxylic acids[J]. *The Journal of Organic Chemistry*, **2013**, 78(6): 2386-2396.
31. Whittaker A M, Dong V M. Nickel-Catalyzed Dehydrogenative Cross-Coupling: Direct Transformation of Aldehydes into Esters and Amides[J]. *Angewandte Chemie International Edition*, **2015**, 54(4): 1312-1315.
32. Lynch K R, Kharel Y, Santos W L, et al. Inhibitors of spinster homolog 2 (spns2) for use in therapy: U.S. Patent Application 17/310,179[P]. **2022**-3-24.
33. Le P, Kunold E, Maccsics R, et al. Repurposing human kinase inhibitors to create an antibiotic active against drug-resistant *Staphylococcus aureus*, persisters and biofilms[J]. *Nature chemistry*, **2020**, 12(2): 145-158.
34. Arkaitz C, Ruben M. Ni-Catalyzed Direct Reductive Amidation via C–O Bond Cleavage[J]. **2014**.
35. Guo Z, Dowdy E D, Li W S, et al. A novel method for the mild and selective amidation of diesters

- and the amidation of monoesters[J]. *Tetrahedron Letters*, **2001**, 42(10): 1843-1845.
36. Buchstaller H P, Ebert H M, Anlauf U. Efficient procedure for the preparation of amides using polymer-bound reagents[J]. *Synthetic Communications*, **2001**, 31(7): 1001-1005.
37. Ito Y, Kobayashi K, Takeo S. Reactions of o-tolyl isocyanide with isocyanate and isothiocyanate syntheses of n-substituted indole-3-carboxamides and indole-3-thiocarboxamides[J]. *Tetrahedron Letters*, **1979**, 20(12): 1039-1042.
38. Kinsella M, Duggan P G, Muldoon J, et al. Synthesis and NMR Binding Studies towards Rational Design of a Series of Electron-Withdrawing Diamide Receptors/Organocatalysts[J]. **2011**.
39. Ramesh P, Fadnavis N W. Ammonium nitrate: A biodegradable and efficient catalyst for the direct amidation of esters under solvent-free conditions[J]. *Chemistry Letters*, **2015**, 44(2): 138-140.
40. Jiang H, Hu Z, Gan C, et al. Visible-light induced one-pot hydrogenation and amidation of nitroaromatics with carboxylic acids over 2D MXene-derived Pt/N-TiO<sub>2</sub>/Ti<sub>3</sub>C<sub>2</sub>[J]. *Molecular Catalysis*, **2021**, 504: 111490.
41. Zhang L, Wang W, Wang A, et al. Aerobic oxidative coupling of alcohols and amines over Au–Pd/resin in water: Au/Pd molar ratios switch the reaction pathways to amides or imines[J]. *Green chemistry*, **2013**, 15(10): 2680-2684.
42. Kang S, Yim H, Won J, et al. Effective Amidation of Carboxylic Acids Using (4, 5-Dichloro-6-oxo-6H-pyridazin-1-yl)-phosphoric Acid Diethyl Ester[J]. *BULLETIN-KOREAN CHEMICAL SOCIETY*, **2008**, 29(5): 1025.
43. Caiuby C A D, de Jesus M P, Burtoloso A C B.  $\alpha$ -Imino iridium carbenes from imidoyl sulfoxonium ylides: application in the one-step synthesis of indoles[J]. *The Journal of Organic Chemistry*, **2020**, 85(11): 7433-7445.
44. Zuo D, Wang Q, Liu L, et al. Highly Chemoselective Transamidation of Unactivated Tertiary Amides by Electrophilic N–C (O) Activation by Amide-to-Acyl Iodide Re-routing[J]. *Angewandte Chemie International Edition*, **2022**, 61(24): e202202794.
45. Xiong N, Dong Y, Xu B, et al. Mild Amide Synthesis Using Nitrobenzene under Neutral Conditions[J]. *Organic Letters*, **2022**, 24(26): 4766-4771.
46. Azeez S, Sureshababu P, Sabiah S, et al. Controlled reduction of activated primary and secondary amides into aldehydes with diisobutylaluminum hydride[J]. *Organic & Biomolecular Chemistry*, **2022**, 20(10): 2048-2053.
47. Yang C H, Li G J, Gong C J, et al. N, N-Dialkylaniline-assisted thionation of carboxylic amides and esters[J]. *Tetrahedron*, **2015**, 71(4): 637-642.
48. Ramachandran K L. Synthesis and Characterization of 2-and 4-Substituted Pyridine Carbothionamides and 2-and 4-Pyridinethio Carbonyl Ureas[J]. *Asian Journal of Chemistry*, **2005**, 17(3): 1559.
49. Sheng H, Zeng R, Wang W, et al. An Efficient Heterobimetallic Lanthanide Alkoxide Catalyst for Transamidation of Amides under Solvent-Free Conditions[J]. *Advanced Synthesis & Catalysis*, **2017**, 359(2): 302-313.
50. Charette A B, Grenon M. Mild method for the conversion of amides to thioamides[J]. *The Journal of Organic Chemistry*, **2003**, 68(14): 5792-5794.
51. Li G, Ji C L, Hong X, et al. Highly chemoselective, transition-metal-free transamidation of unactivated amides and direct amidation of alkyl esters by N–C/O–C cleavage[J]. *Journal of the American Chemical Society*, **2019**, 141(28): 11161-11172.
52. Tang J, Huber A D, Pineda D L, et al. 5-Aminothiophene-2, 4-dicarboxamide analogues as hepatitis

B virus capsid assembly effectors[J]. European journal of medicinal chemistry, **2019**, 164: 179-192.

53. Niggli N E, Vollgraff T, Winter C, et al. Synthesis of Anilides by Aminolysis of Unactivated Esters using MnCl<sub>2</sub> in Combination with strong Bases as Catalyst[J]. Advanced Synthesis & Catalysis, **2023**, 365(11): 1794-1800.
